# **A quantitative principle to understand 3D cellular connectivity in epithelial tubes**

Pedro Gómez-Gálvez<sup>1,2,†</sup>, Pablo Vicente-Munuera<sup>1,2,†</sup>, Samira Anbari<sup>3,†</sup>, Antonio Tagua<sup>1,2,†</sup>, Carmen Gordillo-Vázquez<sup>1,2</sup>, Ana M. Palacios<sup>1,2</sup>, Antonio Velasco<sup>1</sup>, Carlos Capitán-Agudo<sup>1</sup>, Clara Grima<sup>5</sup>, Valentina Annese<sup>1,2</sup>, Rafael Robles<sup>5</sup>, Alberto Márquez<sup>5</sup>, Javier Buceta<sup>3,4,\*</sup>, Luis M. Escudero<sup>1,2,\*</sup>

1: Instituto de Biomedicina de Sevilla (IBiS), Hospital Universitario Virgen del Rocío/CSIC/Universidad de Sevilla and Departamento de Biología Celular, Universidad de Sevilla. 41013 Seville, Spain.

2: Biomedical Network Research Centre on Neurodegenerative Diseases (CIBERNED), Madrid, Spain.

3: Chemical and Biomolecular Engineering Department, Lehigh University. Bethlehem, PA 18018, USA.

4: Bioengineering Department, Lehigh University. Bethlehem, PA 18018, USA.

5: Departamento de Matemática Aplicada I, Universidad de Sevilla. 41012 Seville, Spain.

†: These authors contributed equally to this work.

\*: Corresponding authors

# 1 ABSTRACT

2 Apico-basal cell intercalations (scutoids) optimize packing and energy  
 3 expenditure in curved epithelia. Further consequences of this new paradigm of  
 4 tissue packing remain uncharacterized. In particular, how scutoids modify the  
 5 3D cellular connectivity is an open question. This property is crucial for  
 6 understanding epithelial architecture and is instrumental for regulating the  
 7 biological function of tissues. Here, we address this problem by means of a  
 8 computational model of epithelial tubes and a biophysical approach that links  
 9 geometrical descriptors with the energetic cost required to increase the cellular  
 10 connectivity. Our results predict that epithelial tubes satisfy a novel  
 11 quantitative principle: the “Flintstones’ law”. In short, cellular connectivity  
 12 increases with tissue thickness/curvature in a logistic way. We confirm  
 13 experimentally the existence of this principle using *Drosophila*’s salivary  
 14 glands. Our study provides methodological advances to analyze tissue  
 15 packing in 3D and, more importantly, unveils a morphogenetic principle with  
 16 key biological consequences.

# 17 KEYWORDS

18 Epithelial architecture, Tubulogenesis, Mathematical/Biophysical modeling,  
 19 Computational geometry, Developmental systems biology, Cellular  
 20 connectivity.

21

22

# 1 INTRODUCTION

2 During the last decades much progress has been achieved in the  
 3 understanding of the emergence of self-organization in tissues. This problem  
 4 has been addressed from the viewpoint of energetics considerations (Alt et al.,  
 5 2017; Canela-Xandri et al., 2011; Fletcher et al., 2014; Misra et al., 2017;  
 6 Nelson et al., 2005; Siedlik et al., 2017; Sugimura et al., 2016; Trepatt et al.,  
 7 2009), material-like properties (Bi et al., 2015; Campàs et al., 2014; Latorre et  
 8 al., 2018; Mongera et al., 2018; Pérez-González et al., 2019; Yang et al.,  
 9 2017), and the analysis of the packing properties. As for the latter, the analysis  
 10 of epithelial surfaces as tessellations of convex polygons has been  
 11 successfully used to quantitatively understand different biological aspects such  
 12 as tissue patterning, cell division, and growth (Box et al., 2019; Curran et al.,  
 13 2017; Farhadifar et al., 2007; Gibson et al., 2006, 2011; Honda, 1978; Lewis,  
 14 1928; Mao et al., 2013; Sánchez-Gutiérrez et al., 2016; Thompson, 1945).  
 15 Importantly, these studies have also revealed the validity of mathematical  
 16 principles with biological consequences. One relevant example are the  
 17 implications of Euler's formula (Reinhardt, 1918; Wetzel, 1926) about cellular  
 18 connectivity. This formula implies that polygonal cells in packed tissues, on  
 19 average, have six neighbors (i.e., the average 2D cellular connectivity reads  
 20  $\langle n_{2D} \rangle = 6$ ). As for its biological consequences, the degree of cellular  
 21 connectivity determines, for example, the strength of the cell-cell juxtracrine  
 22 signaling (Tung *et al*, 2012; Sharma *et al*, 2019; Perrimon *et al*, 2012). Not  
 23 surprisingly, the validity of this connectivity principle to the third dimension has  
 24 been taken for granted since the role played by apico-basal cell intercalations  
 25 has been disregarded and cells have been assumed to have prismatic-like  
 26 shapes in either planar or bent epithelia.

27 However, the recent discovery of more complex cellular geometries in  
 28 epithelial cells, i.e., scutoids, to reach an efficient three-dimensional (3D)  
 29 tissue packing has set a new paradigm that has not been yet fully explored  
 30 (Gómez-Gálvez et al., 2018; Mughal et al., 2018; Rupprecht et al., 2017).  
 31 Scutoids imply spatial changes in the neighboring relationship between cells  
 32 (**Fig. 1A**). This phenomenon is then a spatial version of the T1 transitions that  
 33 produce cell rearrangements with time in numerous developmental processes

1 (Bertet et al., 2004; Irvine and Wieschaus, 1994; Spencer et al., 2017). Thus,  
 2 the presence of scutoids necessarily modifies the connectivity and the  
 3 biophysical properties of tissues. Still, the analysis of tissue organization in a  
 4 3D context, and the corresponding biological repercussions, have been  
 5 hindered by the technical difficulties to accurately segment and reconstruct  
 6 cells from apical to basal surfaces. In addition, very few computational models  
 7 account for the presence of apico-basal transitions to investigate 3D self-  
 8 organization in tissues (Gómez-Gálvez et al., 2018; Mughal et al., 2018;  
 9 Okuda et al., 2019; Rupprecht et al., 2017).

10 The realistic analysis of 3D packing is in turn utterly relevant in epithelial  
 11 tubes, where scutoids appear more frequently (Gómez-Gálvez et al., 2018;  
 12 Iruela-Arispe and Beitel, 2013; Sanchez-Corrales et al., 2018). Epithelial tubes  
 13 are in fact the primary developmental structures in all organisms with bilateral  
 14 symmetry (Gilbert and Barresi, 2016) and tubulogenesis is fundamental in a  
 15 broad variety of key developmental processes, including gastrulation and  
 16 neurulation (Colas and Schoenwolf, 2001; Iruela-Arispe and Beitel, 2013;  
 17 Leptin and Grunewald, 1990; Nelson, 2009; Pilot and Lecuit, 2005; Swanson  
 18 and Beitel, 2006). Furthermore, epithelial tubes are the essential functional  
 19 unit of many mammalian organs, including glands, components of the  
 20 digestive apparatus, lungs, and kidney (Huebner and Ewald, 2014). Hence,  
 21 the faithful formation and function of tubes requires the precise coordination of  
 22 dynamic changes in the tissue architecture, i.e., packing, during development  
 23 (Röper, 2018).

24 Here, we study the packing and the 3D cellular connectivity properties of  
 25 epithelial tubes. We show that the presence of scutoids implies a breakdown  
 26 of the principle  $\langle n_{3D} \rangle = 6$  and reveal a novel law that quantitatively links the 3D  
 27 cellular connectivity, geometrical descriptors (e.g., tissue curvature/thickness),  
 28 and energetics. Our findings are supported by i) a computational model that  
 29 realistically render the 3D cellular organization of tubular epithelia (including  
 30 the appearance of scutoids); ii) a biophysical model, supported by  
 31 mathematical calculations, that connects the tissue energetics with the 3D  
 32 organization of epithelial tubes; and iii) experimental data of epithelial tubes

1 (*Drosophila*'s salivary gland) whose 3D cellular structure has been accurately  
2 characterized by means of a novel computer-aided image analysis method.

3 Altogether, by realistically capturing the organization of cells in tubular  
4 epithelia, we shed light on the important issue of how tissues are 3D shaped  
5 and we open the door to understand quantitatively key morphogenetic events  
6 that ultimately depends on the 3D cellular connectivity.

7

## 8 RESULTS

### 9 A computational model unveils the connectivity properties of tubular 10 epithelia

11 To understand how the geometry of tubular epithelia affects the 3D cellular  
12 packing and connectivity, we designed and implemented a computational  
13 Voronoi tubular model (Gómez-Gálvez et al., 2018) (**Materials and Methods**).  
14 We analyzed tubes with an increasing surface ratio (radial expansion),  
15  $s_b = R_b/R_a$  (**Fig. 1B**). This parameter quantifies the ratio of the non-trivial  
16 curvatures of apical and basal tubular surfaces,  $\kappa_a/\kappa_b = R_b/R_a = s_b$ , and it is  
17 a proxy for the dimensionless tissue thickness,  $(R_b - R_a)/R_a = (s_b - 1)$ . In  
18 addition, we explored the cellular organization of tubes by using a Centroidal  
19 Voronoi Tessellation (CVT) scale (**Fig. 1C**). The CVT scale accounts for the  
20 number of iterations of the homogenizing Lloyd's algorithm and makes  
21 possible to analyze the effect of the topological order of the tissue (**Materials**  
22 **and Methods**) (Gómez-Gálvez et al., 2018; Sánchez-Gutiérrez et al., 2016).

23 Our results showed that the average number of apico-basal intercalations  
24 per cell,  $\langle i(s_b) \rangle$ , (**Fig. 1D**), and therefore the percentage of cells adopting the  
25 scutoidal shape (**Fig. S1**), increases with  $s_b$  and decreases as tubes become  
26 more ordered (i.e., as the CVT index increases). To further uncover the 3D  
27 organization of tissues, we implemented a benchmark able to reveal  
28 simultaneously the existence of apico-basal intercalations (scutoids) and the  
29 polygonal distributions of cells. To that end, we computed the probability that  
30 cells change their polygonal class between the apical and basal surfaces.  
31 Thus, the components (i.e., bins) of this distribution along the diagonal  
32 account for prismatic cells (**Fig. 2A**) whereas the spreading away from the  
33 diagonal reveals the existence of scutoids (cells that exchange neighbors due

1 to apico-basal intercalations) and, consequently, changes in the cellular 3D  
2 connectivity in the tissue (**Fig. 2B**). In agreement with the results shown in **Fig.**  
3 **1D**, our data indicates that the degree of spreading of the distribution (as  
4 quantified by the parameter,  $\eta^2$ , **Materials and Methods**) increases with the  
5 surface ratio and decreases when the initial (i.e., apical) Voronoi diagram  
6 became more ordered, that is, as the CVT increases (**Fig. 2C**).

7 Moreover, we computed the average of the total number of contacts of the  
8 cells,  $\langle n_{3D} \rangle$ , as a function of the surface ratio and the initial Voronoi diagram  
9 (**Fig. 2D**). Our data are quantitatively consistent with a mathematical derivation  
10 that shows that  $\langle n_{3D} \rangle$  is linearly proportional to the number of apico-basal  
11 intercalations (**Materials and Methods** and **Fig. S1**). Also, these results  
12 indicated that the average cellular connectivity grows as the tissue thickness  
13 and the randomness of cellular organization increases.

14 In summary, our computational model suggests a relation between the  
15 tissue geometry (i.e., cell thickness/curvature), the cellular planar topological  
16 order (CVT index), and the 3D cellular connectivity in epithelial tubes.

17

## 18 **The 3D neighbor's accumulation follows a “poor get richer” principle**

19 In order to shed light on the underlying mechanisms that determine the  
20 degree of 3D cellular connectivity in our model of tubular epithelia, we  
21 computed the net gain of cellular neighbors as a function of the radial  
22 expansion (thickness/curvature of tubes) and the topological properties of cells  
23 (CVT index and polygonal class at the apical surface). As a general trend, we  
24 observed that, independently of the radial expansion, the smaller the number  
25 of neighbors at the apical surface the larger the net gain of 3D cellular  
26 contacts (**Fig. 3A and B** and **Fig. S2**). Additionally, we also checked that this  
27 tendency is satisfied when estimating the net gain of neighbors accumulated  
28 from the basal to the apical surface (**Fig. S2**). These results suggest that in the  
29 Voronoi tubular model the 3D cell packing follows a “poor get richer” principle  
30 driven by apico-basal intercalations: the less neighbors a cell has in a surface  
31 (apical or basal), the larger the net increase of cellular contacts. Interestingly,  
32 this result is akin to the behavior found in planar geometries that indicates that

1 the probability of undergoing a T1 transition increases as the number of  
2 neighbors decreases (Bi et al., 2014), see Discussion.

### 3 **An energetics model suggests that cellular connectivity satisfies a** 4 **logistic-like law**

5 In light of this evidence, and in order to better understand the dependence  
6 of the tissue self-organization on the radial expansion,  $s = R/R_a$ , we  
7 developed a biophysical model (a Kolmogorov rate equation) that accounts for  
8 the probability of cells to increase their 3D connectivity (**Fig. 4A and B** and  
9 **Materials and Methods**):

$$10 \quad \frac{dP_m(s)}{ds} = P_{m-1}(s)r_{m-1,m} - P_m(s)r_{m,m+1} \quad (1)$$

11 where,  $P_m$ , is the probability of having  $m$  accumulated 3D neighbors (i.e.,  
12  $m = n_{3D}$ ) as the surface ratio changes from  $s$  to  $s + ds$ , and  $r_{i,i+1}$  accounts for  
13 the rate per unit of surface ratio of undergoing an apico-basal intercalation. By  
14 drawing parallels between apico-basal intercalations and planar T1 transitions  
15 (Gómez-Gálvez et al., 2018; Sanchez-Corrales et al., 2018) we assumed that  
16 cells need to overcome an energy barrier to gain a 3D neighbor, that is,  
17  $r_{i,i+1} \sim e^{-\Delta E_i}$  (**Fig. 4A and B**). The “poor get richer” principle suggests that  $\Delta E_i$   
18 grows as  $i$  increases. In addition, our mathematical calculations proved that  
19 the apico-basal intercalation rate becomes null for a finite value of  $i$  (**Box** and  
20 **Materials and Methods**): neighbors’ gaining is necessarily bounded or,  
21 energetically speaking, the energy barrier to undergo an apico-basal transition  
22 becomes eventually infinite. All these facts led to the following expression for  
23 the apico-basal intercalation rate:  $r_{i,i+1} = \alpha(N_{max} - i)e^{-i\beta}$ , where  $\alpha$  is a ‘bare’  
24 transition rate,  $\beta$  is the dimensionless energy (in units of the four-fold vertex  
25 energy configuration) per 3D neighbor that a cell needs to increase its  
26 connectivity to an additional cell, and  $N_{max}$  is the maximum 3D cellular  
27 connectivity (**Materials and Methods**).

28 The fitting of the *in silico* data about the average tissue connectivity,  
29  $\langle n_{3D}(s) \rangle = \sum_m m P_m(s)$ , to this biophysical model showed an excellent  
30 agreement and confirmed that  $\langle n_{3D} \rangle > 6$  as long as the tissue is subjected to  
31 some level of anisotropic curvature (**Fig. 4C, Fig. S3** and **Materials and**  
32 **Methods**). We also observed that the energy required per 3D neighbor to

1 undergo an intercalation,  $\beta$ , quickly reached a plateau,  $\beta \simeq 5 \cdot 10^{-2}$ , as the  
 2 tissue became more ordered (i.e., as the CVT index increases). Our results  
 3 also indicate that in Voronoi tubes the scutoidal geometry enables a  
 4 theoretically increase of the average 3D cellular connectivity up to  
 5  $\langle N_{max} \rangle \sim 12 - 15$  cells (**Table S1**). In addition, the plausibility of the Kolmogorov  
 6 approach was further assessed by predicting the 3D neighbor distribution,  
 7  $P_m(s)$ , thus confirming that a link between geometrical and energetic traits  
 8 determines the cellular connectivity in the Voronoi tubular model (**Fig. 4C**).

9 We also obtained theoretically an analytical formula that characterizes the  
 10 average 3D cellular connectivity,  $\langle n_{3D} \rangle$  (**Box** and **Materials and Methods**).  
 11 We concluded that in the Voronoi tubular model  $\langle n_{3D} \rangle$  can be described by a  
 12 logistic-like behavior,

$$13 \quad \langle n_{3D}(s) \rangle \approx \langle N_{max} \rangle \frac{1 + b e^{-\frac{s}{c}}}{1 + d e^{-\frac{s}{c}}}, \quad (2)$$

14 where  $b$ ,  $c$ , and  $d$  are non-independent parameters that are functions of  $\alpha$ ,  $\beta$ ,  
 15 and  $\langle N_{max} \rangle$  (**Table S1** and **Materials and Methods**). We refer to this logistic-  
 16 like principle as the “Flintstones’ law” after the Stone-Age cartoon characters.  
 17 We argue that this organizing principle is as ancient as the first organized  
 18 tissue found in evolution: epithelia (hereby the name).

19 The analysis of computational tubes revealed the validity of the Flintstones’  
 20 law as an effective way to determine the cellular connectivity in a model of  
 21 tubular epithelia as a function of the radial expansion (**Fig. 4C** and **Fig. S3**).  
 22 More importantly, it provides a straightforward way to estimate/predict the  
 23 value of the underlying energetic properties regulating apico-basal  
 24 intercalations and the limiting average 3D cellular connectivity (**Table S1**).

25

## 26 **Experiments confirm that the 3D cellular connectivity in tubular epithelia** 27 **satisfies the Flintstones’ law**

28 In order to confirm our computational and theoretical predictions, we  
 29 implemented a novel methodological pipeline that combines several  
 30 computational image analysis techniques to accurately segment cells of *in vivo*  
 31 epithelial tubes (Arganda-Carreras et al., 2017; Machado et al., 2019)



1 **(Materials and Methods)**. We used the *Drosophila* larval salivary gland as a  
2 model due to its ideal characteristics to study complex tubular architectures  
3 (Girdler and Röper, 2014) (**Fig. 5A-C**).

4 Our methodology allowed to determine the average surface ratio of the  
5 salivary glands ( $s_b = 4.0 \pm 0.4$ ),  $\langle n_{3D}(s_b) \rangle = 6.7 \pm 0.2$ , the average percentage  
6 of scutoids ( $76 \pm 11\%$ ), and the average number of apico-basal intercalations  
7 per cell,  $\langle i(s_b) \rangle = 1.4 \pm 0.4$ , thus confirming the validity of the formula that  
8 relates apico-basal intercalations per cell and the average connectivity:  
9  $\langle n_{3D} \rangle = 6 + \langle i \rangle / 2$  (**Materials and Methods** and **Fig. S1**). We also calculated  
10 the polygonal class distribution in the apical and basal surfaces (**Fig. S4**).  
11 Interestingly, in spite of the prevalence of scutoids, the polygonal organization  
12 of apical and basal surfaces was found to be the same and equivalent to that  
13 obtained in *in silico* V8 tubes with a radial expansion  $s_b = 1.75$  (**Fig. S4**). This  
14 V8 model ( $s_b = 1.75$ ) also displayed a similar scutoidal prevalence ( $79 \pm 5\%$ ),  
15 average number of 3D neighbors, average number of apico-basal  
16 intercalations per cell, and  $\eta^2$  spreading that *in vivo* tubes (**Fig. 5D** and **Fig.**  
17 **S4**). We additionally confirmed that the apical and basal surfaces of the V8  
18 model and the salivary glands fulfilled, as expected, that  $\langle n_{2D} \rangle \approx 6$  (Reinhardt,  
19 1918; Wetzel, 1926) (**Fig. S4**). Thus, we concluded that the *in silico* V8 model  
20 with a radial expansion of  $s_b = 1.75$  faithfully recapitulates the 3D packing  
21 properties of *in vivo* salivary glands.

22 As for the 3D cellular connectivity of *in vivo* tubes, our analyses confirmed  
23 that the “poor get richer” principle was satisfied, thus supporting the idea that  
24 the smaller the number of neighbors of a cell in a surface, the larger the  
25 probability to increase its connectivity (**Fig. S4**). Additionally, by implementing  
26 an un-rolling (i.e., peel-off) algorithm (Yang et al., 2019) (**Materials and**  
27 **Methods**), we obtained concentric radial sections and quantified the number  
28 of 3D neighbors as a function of the radial expansion. The fitting of the data to  
29 the Kolmogorov model showed an excellent agreement and allowed to  
30 estimate the energetic properties as summarized by the parameter  $\beta$  (**Fig. 5E**  
31 and **Table S1**). Our results suggested that the energy per 3D cell required to  
32 undergo an apico-basal intercalation is larger in *in vivo* tubes than in the  
33 computational V8 model, see Discussion. Importantly, the 3D cellular

1 connectivity data confirmed the applicability of the Flintstones' law in *in vivo*  
2 tubular epithelia (**Fig. 5E** and **Table S1**).

3

## 4 **DISCUSSION**

5 Here we have shown how mathematical and physical principles underlie the  
6 emergence of functionally complex 3D developmental structures, e.g., glands.  
7 Our analyses have uncovered for the first time how a 2D organizational trait,  
8 i.e., the cellular connectivity, can be extended to the third spatial dimension  
9 when the novel paradigm of epithelial cells' shapes and packing, the scutoid,  
10 is considered. In that regard, we have revealed how the 3D cellular  
11 connectivity and tissue energetics are coupled, and we have stated a novel  
12 principle, the so-called Flintstones' law. The latter links the activation energy  
13 needed to recruit additional neighbors with geometrical descriptors (i.e., tissue  
14 thickness/curvature). Our results provide new biological insight into the  
15 spatiotemporal regulation of cell-cell connectivity, a property that ultimately  
16 regulates juxtracrine signaling and is pivotal for primordia patterning and cell  
17 fate determination (Sharma et al., 2019; Tung et al., 2012). In this context, our  
18 study points towards an effect of scutoids on the regulation of the physiological  
19 properties of tissues. Therefore, our findings, on top of being fundamental to  
20 understand self-organization of epithelia in 3D, open new ways to investigate,  
21 and draw implications about, primary developmental processes in which  
22 epithelial bending is essential such as tubulogenesis, gastrulation, or  
23 neurulation.

24 Our study also provides important methodological advances. Previous  
25 software developed to identify the outlines of the epithelial cells does not work  
26 on 3D or lacks enough precision to extract the geometrical and topological  
27 data needed to quantify tissue packing in 3D (Bassel et al., 2014; Gómez-  
28 Gálvez et al., 2018; Heller et al., 2016; Khan et al., 2014). Here we have  
29 shown that our methodological pipeline (**Materials and Methods**) allows to  
30 implement a 3D segmentation and the precise reconstruction of cells in  
31 epithelia subjected to curvature. We stress that this level of detail is necessary  
32 to be able to quantify the apico-basal intercalation phenomenon and,  
33 therefore, compare the results with the computational models and extract

1 biological consequences. We then argue that our methodology, by enabling  
2 the analysis of 3D packing in a realistic way, will benefit the field of  
3 morphogenesis by bringing understanding about the cellular and mechanical  
4 basis of self-organization in curved tissues (Ambrosini et al., 2017; Hirashima  
5 and Adachi, 2019; Inoue et al., 2019) or even whole embryos (Shahbazi et al.,  
6 2019). In addition, our analysis indicates that the Flintstones' law can be used  
7 quantitatively to estimate key connectivity-related parameters, e.g.,  $\beta$  and/or  
8  $\langle N_{max} \rangle$ . This avoids the burden of solving the optimization problem associated  
9 with the Kolmogorov model that is computationally demanding (**Material and**  
10 **Methods**). Thus, the values obtained by means of fittings to the Flintstones'  
11 law are, at the very least, within the same order of magnitude with respect to  
12 the 'exact' Kolmogorov calculations (**Table S1**). This reveals the usability of  
13 the Flintstones' law not just as a principle that is satisfied by tubular epithelia,  
14 but as a practical way to connect packing properties, geometrical descriptors,  
15 and biophysical traits due to its predictive character.

16 As a matter of discussion, the connectivity law that we have introduced  
17 herein, depends on a prediction obtained from the Voronoi computational  
18 model that was confirmed in experiments: the "poor get richer" principle.  
19 Roughly speaking, we have shown that the fewer neighbors a cell has on a  
20 surface, the larger is the probability of a connectivity increase. Interestingly, a  
21 similar idea has been reported in T1 dynamical processes during the  
22 remodeling of planar epithelia (Bi et al., 2014). Since the scutoidal geometry  
23 can be related to planar T1 transitions by exchanging the concepts of space  
24 and time, this result reinforces the idea of the existence of universal principles  
25 driving the organization of tissues.

26 In our study we have found that in real tissues the energy cost per 3D  
27 neighbor that a cell requires to increase its connectivity,  $\beta$ , is larger than in  
28 Voronoi models. We hypothesize that it is due to the purely geometrical  
29 description used in the latter. That is, while in *in silico* models the apico-basal  
30 transitions develop just a result of a topological constraint (Voronoi  
31 tessellation), in the salivary glands, on top of topological constraints, the cells  
32 must actively remodel their cytoskeleton to make the transitions possible. That  
33 component would explain the larger effective cost of gaining new neighbors in

1 real tissues. The reduced energetic cost for gaining neighbors in the Voronoi  
 2 computational approach also explains why *in silico* tubes led to a larger  
 3 limiting average 3D cellular connectivity,  $\langle N_{max} \rangle$ , and the V8 model with the  
 4 same surface ratio that the salivary gland,  $s_b = 4$ , developed more apico-basal  
 5 transitions than the real samples (**Fig. 5E**, **Fig. S4**, and **Table S1**). These data  
 6 ultimately explain why it is necessary to rescale appropriately  $s_b$  to obtain a  
 7 computational model with packing, topological, and connectivity properties  
 8 similar to those of the salivary glands. In that regard, our results suggest that  
 9 salivary glands are optimized to reach a high cellular connectivity. While the *in*  
 10 *silico* V8 model with a radial expansion of  $s_b = 1.75$  or  $s_b = 4$  are far for  
 11 reaching their maximum average connectivity (i.e.,  $\langle n_{3D} \rangle$ 's are, respectively,  
 12  $\sim 47\%$  and  $\sim 61\%$  of  $\langle N_{max} \rangle$ ), in the salivary glands  $\langle n_{3D}(s_b) \rangle$  is  $\sim 87\%$  of  
 13  $\langle N_{max} \rangle$  (**Fig. 5E**, **Fig. S4**, and **Table S1**). This optimization could be related to  
 14 a functionality improvement of the gland, similarly to what has been suggested  
 15 in pituitary growth hormone secretory cells, where the increase of 3D cellular  
 16 connectivity has been proposed to better coordinate the pulses of hormone  
 17 secretion (Bonnetfont et al., 2005).

18 As for the broader implications of our findings, we argue that, while our  
 19 analyses focus on static tissues from the point of view of tissue architecture,  
 20 our results can also be relevant to understand active 3D tissue remodeling  
 21 (e.g., fluidization). Recent studies have revealed that active remodeling  
 22 involves changes in the material-like properties of tissues that can be  
 23 connected to an increased activity of neighbor exchanges (Mongera et al.,  
 24 2018; Tetley et al., 2019). In that regard, here we have shown that the physical  
 25 basis of 3D self-organization (i.e., 3D cellular packing and connectivity) in  
 26 tubular epithelia effectively relies on a constant amount of energy,  $\beta$ . Thus,  
 27 arguably, active 3D tissue remodeling would imply dynamical changes on the  
 28 value of  $\beta$  that would modify the apico-basal intercalation propensity and  
 29 therefore the material-like properties: the larger  $\beta$  the more solid-like the tissue  
 30 would behave. Finally, with respect to the applicability of our results to other  
 31 areas, we expect that the emerging field of organoids will benefit from our  
 32 discoveries. A precise quantification of 3D connectivity could then help to  
 33 understand the lack of reproducibility in organoid production, one of the

1 biggest challenges of the field (Clevers, 2016; Huch et al., 2017; Schutgens et  
2 al., 2019). Also, from a medical point of view, it has been recently shown that  
3 tissue curvature affects tumor progression due to the imbalance of tensions in  
4 apical and basal surfaces of epithelial tubes (Messal et al., 2019). The  
5 Flintstones' law explains how cell energetics affect the 3D packing of these  
6 cells and therefore may shed light on the mechanism of tumorigenic  
7 morphogenesis in tubular organs.

## 8 **MATERIALS AND METHODS**

### 9 **Immunohistochemistry and confocal imaging of salivary glands**

10 Flies were grown at 25 °C using standard culture techniques. We dissected  
11 the salivary glands from third instar larvae of the wild type *Oregon R* strain.  
12 After PBS dissection, the glands were fixed using 4% paraformaldehyde in  
13 PBS for 20 min. The samples were washed three times for 10 min with PBT  
14 (PBS, 0.3% Triton) and then incubated for 1 hr 45 minutes at room  
15 temperature with Cy3-labeled phalloidin (Sigma) to label the cell contours of  
16 the epithelial cells. Stained larval salivary glands were mounted using  
17 Fluoromount-G (Southern Biotech). We used two pieces of double-sided  
18 adhesive tape (one on top of each other) as a spacer (Aldaz et al., 2013), so  
19 the salivary glands preserve their shape. Images were taken using a Nikon  
20 Eclipse Ti-E laser scanning confocal microscope. The images were captured  
21 using a ×20 dry objective and 2.5 μm steps between slices. The image stacks  
22 were exported as 1024 × 1024 pixels TIFF files.

### 23 **3D glands segmentation**

24 To segment the salivary gland stacks of images and reconstruct (semi-  
25 automatically) the shape of cells in three dimensions we used the FIJI  
26 (Schindelin et al., 2012) plugin LimeSeg (Machado et al., 2019). We inferred  
27 cell outlines by using surface elements ("Surfels") obtained by placing single  
28 ellipsoidal-like seeds on every cell (see <https://imagej.net/LimeSeg> for details).  
29 Once cell outlines were found (**Fig. 5B-C**), we exported them as point clouds  
30 (output). We developed a custom-made Matlab code (2018a MathWorks) to  
31 postprocess the output of LimeSeg in order to correct errors and obtain  
32 perfectly segmented salivary glands. In addition, we manually segmented the

1 lumen of the glands from the images using Adobe Photoshop CS6 and  
2 reconstructed it using a Matlab code. To faithfully represent the gland as a  
3 cylinder, we selected a subset of cells: cells that were not ductal, neither  
4 located at the tip of the gland. For more information about the processing  
5 pipeline: <https://osf.io/nd5t6/>.

6 To obtain the cellular neighborhood relations of salivary glands for different  
7 values of the radial expansion, we proceeded as follows. We calculated the  
8 cell height by estimating the distance between the average voxel positions of  
9 the apical surface with respect to the average voxel positions of its basal  
10 surface,  $d(s_a, s_b)$ . Then, to capture a concentric radial section of the gland, we  
11 linearly extrapolated the equivalent cell height to the given surface ratio,  $s$ :

$$12 \quad d(s_a, s) = d(s_a, s_b) \frac{s}{s_b} \quad (3)$$

13 where  $d(s_a, s)$  is the Euclidean distance between the position of the centroid of  
14 the cell at the apical surface,  $s_a = 1$ , and the position of the centroid at a value  
15  $s = R/R_a$  of the radial expansion. Finally, to obtain the gland cylindrical radial  
16 section for a given value of the radial expansion,  $s$ , we collected all voxels  
17 between apical and the upper bound of the calculated distance  $d(s_a, s)$ . Those  
18 cylindrical surfaces of the salivary gland were mapped in the Cartesian plane  
19 for analysis using a cylindrical coordinates transformation.

## 20 **Salivary glands measurements**

21 We quantified the following geometrical and topological descriptors of the  
22 segmented salivary glands using a custom-made Matlab code:

- 23 - Surface ratio expansion ( $s$ ): Assuming a cylindrical shape for glands,  
24 we estimated  $s$  by dividing the area of the basal surface of glands by  
25 area of the apical surface.
- 26 - Polygonal Class. We estimated the number of sides of each cell using  
27 the unrolled images (radial cylindrical sections) projected in the  
28 Cartesian plane.

29 Likewise, we carried out the calculations of the percentage of scutoids and  
30 the number of apico-basal transitions.

## 31 **Voronoi tubular model**

1 Using custom-made Matlab code (R2018a) we generated a Voronoi model  
2 that simulates the surface of a cylinder unfolded over the Cartesian plane, see  
3 details in Gomez-Galvez et al. ((Gómez-Gálvez et al., 2018), **Material and**  
4 **Methods**). The only difference with the cited methodology, is that in this work  
5 the Voronoi diagrams has been constructed by means of the Delaunay  
6 triangulation technique. Therefore, we just considered the cells' vertices  
7 information (cartesian coordinates and connections) for a much faster  
8 computation. For each realization, we used an initial set of 200 randomly  
9 located seeds on a rectangular domain of 512 (X axis; transverse axis of  
10 cylinder) per 4096 (Y axis; longitudinal axis of cylinder). In total, we  
11 implemented 20 different realizations (i.e., tubes). We performed this  
12 procedure for 10 different initial Voronoi diagrams (Voronoi 1 (V1, random  
13 seeds) to Voronoi 10 (V10, more ordered and homogeneous cells). These  
14 diagrams represent the apical (inner) surfaces of computational tubes, and  
15 they were obtained by applying N-1 times the Lloyd's algorithm (Lloyd, 1982)  
16 to the random seeds, where N is then the resulting Voronoi model. For  
17 instance, to compute a V1, we use purely random seeds, while to obtain a V4  
18 diagram, it would be required to apply 3 times the Lloyd's algorithm to random  
19 seeds. V8 diagrams provide a polygonal organization in apical surfaces as  
20 experimentally observed (Main Text and **Fig. S4**). Subsequent radial sections  
21 that define computational tubes with different surface ratios were obtained by  
22 implementing a radial projection of the Voronoi seeds. For each apical surface  
23 of the tube, we generated 40 expansions by incrementing the surface ratios  
24 ( $s_b$ ) using 0.25 steps: 1 (apical), 1.25, 1.5, ... ,10 (maximum basal surface).

25 As for the 3D reconstruction of cells in Voronoi tubes, each set of seeds that  
26 characterizes cells on a given cylindrical section defines a unique 2D Voronoi  
27 diagram at every surface and hence the corresponding 2D cellular domains.  
28 The set of 2D Voronoi regions that belong to the same radially projected seed  
29 from the apical to the basal surface then define each 3D cellular shape. Each  
30 of the obtained 3D Voronoi cells was further processed using the Matlab  
31 function '*alphaShape*' to transform the set of voxels into a compact, solid,  
32 object. This reconstruction pipeline was implemented using Matlab (2018a).  
33 Code available at <https://osf.io/nd5t6/>.



# 1     **Voronoi tubular model measurements.**

2     We measured the following properties of cells in Voronoi tubular models:  
3     number of sides of cells for a given radial section, and total number neighbors.  
4     Additionally, we computed the percentage of scutoids, the number of apico-  
5     basal transitions, the polygon distribution of every surface (radial sections). In  
6     these quantifications, we disregarded cells at the boundaries (tips of tubes) to  
7     avoid 'border effects'.

## 8     **In Voronoi tubes the net gain of 3D neighbors is bounded**

9     Assuming a cylindrical geometry (e.g., epithelial tubes), each point at a given  
10    radial surface can be represented into the Cartesian plane; where coordinate  $x$   
11    accounts for the cylindrical transversal coordinate and coordinate  $y$  for the  
12    longitudinal one (see **Box**). Thus, if the coordinates of a point (e.g., a Voronoi  
13    seed) at the apical surface are given by  $(x, y)$ , the coordinates of that point at  
14    a surface with a value of the cylindrical radial expansion  $s \in [1, \infty)$  can be  
15    found by defining the function  $f_s: \mathbb{R}^2 \rightarrow \mathbb{R}^2$   $f_s(x, y) = (sx, y)$ . Under these  
16    conditions, we aim to characterize the seeds that generate scutoids  
17    (exchanges in the neighboring relations of seeds) as  $s$  changes.

18    *Lemma 1.* Given three non-colinear points  $\{A, B, C\}$  that define a circle (a  
19    nearest-neighbors relation), and another exterior point  $D$ , if  $s > 1$  exists such  
20    that  $f_s(D)$  is interior to the circle defined by  $\{f_s(A), f_s(B), f_s(C)\}$ , then  $D$  is inside  
21    of the vertical parabola containing  $\{A, B, C\}$  (**Box**).

22    *Remark.* If two of the three points  $\{A, B, C\}$  are on the same vertical line, then  
23    the parabola considered in Lemma 1 degenerates as a vertical strip. Even in  
24    this case, the thesis of the Lemma is true if we replace the interior of the  
25    parabola by the inside of the strip.

26    *Proof.* Without loss of generality, we can suppose that  $\{A, B, C\}$  are  
27    counterclockwise oriented and that they have Cartesian coordinates  $(a_1, a_2)$ ,  
28     $(b_1, b_2)$  and  $(c_1, c_2)$  respectively.

29    Thus, the point  $D(x, y)$  is outside the circle defined by  $\{A, B, C\}$  if, and only if,  
30    the sign of the following determinant is negative:



$$\begin{vmatrix} a_1 & a_2 & a_1^2 + a_2^2 & 1 \\ b_1 & b_2 & b_1^2 + b_2^2 & 1 \\ c_1 & c_2 & c_1^2 + c_2^2 & 1 \\ x & y & x^2 + y^2 & 1 \end{vmatrix} = \begin{vmatrix} a_1 & a_2 & a_1^2 & 1 \\ b_1 & b_2 & b_1^2 & 1 \\ c_1 & c_2 & c_1^2 & 1 \\ x & y & x^2 & 1 \end{vmatrix} + \begin{vmatrix} a_1 & a_2 & a_2^2 & 1 \\ b_1 & b_2 & b_2^2 & 1 \\ c_1 & c_2 & c_2^2 & 1 \\ x & y & y^2 & 1 \end{vmatrix} < 0 \quad (4)$$

For the sake of simplicity, we represent the previous equation as:

$$\det(\mathcal{A}) = \det(\mathcal{B}) + \det(\mathcal{C}) < 0 \quad (5)$$

On the other hand, by considering  $x$  and  $y$  as variables, the equation  $\det(\mathcal{A}) = 0$  corresponds to the circle defined by  $\{A, B, C\}$ , and  $\det(\mathcal{B}) = 0$  corresponds to the vertical parabola defined by the same three points. Consequently, the inequality  $\det(\mathcal{B}) > 0$  defines the locus of interior points to that parabola.

Now, assuming that  $s > 1$  exists such that  $f_s(D)$  is interior to the circle defined by  $\{f_s(A), f_s(B), f_s(C)\}$ . Then,

$$\begin{vmatrix} sa_1 & a_2 & s^2 a_1^2 + a_2^2 & 1 \\ sb_1 & b_2 & s^2 b_1^2 + b_2^2 & 1 \\ sc_1 & c_2 & s^2 c_1^2 + c_2^2 & 1 \\ sx & y & s^2 x^2 + y^2 & 1 \end{vmatrix} = s^3 \det(\mathcal{B}) + s \det(\mathcal{C}) > 0 \quad (6)$$

Or, equivalently,  $s^2 \det(\mathcal{B}) + \det(\mathcal{C}) > 0$ , so,  $s^2 \det(\mathcal{B}) > -\det(\mathcal{C})$ . If  $\det(\mathcal{B}) < 0$ , then  $1 < s^2 < -\frac{\det(\mathcal{C})}{\det(\mathcal{B})}$  and therefore  $\det(\mathcal{B}) > -\det(\mathcal{C})$ . The latter is in contradiction with  $\det(\mathcal{B}) + \det(\mathcal{C}) < 0$ . As a result,  $\det(\mathcal{B}) > 0$ , and the following inequality holds,

$$s^2 > -\frac{\det(\mathcal{C})}{\det(\mathcal{B})} > 1 \quad (7)$$

Notice that if the circle defined by  $\{A, B, C\}$  is surrounded by a set of points and we change continuously the parameter  $s$  in the interval  $[1, \infty)$ , it is possible to detect the first point touching the circle defined by  $\{f_s(A), f_s(B), f_s(C)\}$ . That point can be obtained by computing all the points at  $s = \sqrt{-\frac{\det(\mathcal{C})}{\det(\mathcal{B})}}$ . Hence, the first point contacting the circle will be that with the minimum value of  $s$ .

1 As for proving that the average of the number of neighbours of a cell induced  
2 by a seed grows is bounded as a function of the surface ratio, we state the  
3 following proposition:

4 *Proposition 1.* Given a Voronoi seed representing a cell, if  $n_{3D}(s)$  is the total  
5 number of accumulated cell neighbors as  $s$  increases from  $s = 1$  (apical  
6 surface) to a given value of  $s$ , then  $\langle n_{3D}(s) \rangle$  is a bounded function for a finite  
7 cylinder.

8

9 *Proof.* We model the apical surface as the cylinder  $2\pi r \times h$ , where  $r$   
10 represents the inner radius and  $h$  the length of the cylinder. Given a seed  $A$   
11 in that surface, in the corresponding Delaunay triangulation it appears as a  
12 point surrounded by triangles defining the neighbourhood of  $A$ . By Lemma 1,  
13 each triangle defines a vertical parabola and a circle. So, any other seed  
14 touching  $A$  in other layer must be inside of one of the parabolas and outside of  
15 all circles (see **Box**). Let's denote  $\mathcal{R}_{s,A}$  the feasible region for a new neighbour  
16 of  $A$  in the layer represented by  $s$ , i.e., all points inside one of the parabolas  
17 and outside all the circles. Thus, if  $\#(\mathcal{R}_{s,A})$  is the number of seeds in that  
18 region that are not neighbours of  $A$  in the apical surface, obviously, an upper  
19 bound to the number of new neighbours to  $A$  is given by  $\#(\mathcal{R}_{s,A}) \leq \#(\mathcal{R}_{1,A})$ .

20

21 On the other hand, that number of seeds is, in average, proportional to the  
22 density of seeds times the area of  $\mathcal{R}_{s,A}$ , therefore, the average number of  
23 accumulated neighbours of  $A$ , denoted as  $\langle n_{3D}(A) \rangle$ , will be bounded by the  
24 change of the density of points when growing  $s$ , this is to say,

25

$$26 \quad d\langle n_{3D}(A) \rangle \leq M \cdot \frac{\mathcal{R}_{s,A}}{2\pi sr \cdot h} ds \quad (8)$$

27

28 where  $M$  represents the total number of seeds (i.e., the total number of cells  
29 that is a constant) and the quotient is the area of  $\mathcal{R}_{s,A}$  divided by the area of a  
30 given radial layer. In general, it is not possible to integrate equation (4), since  
31 the area of  $\mathcal{R}_{s,A}$  is known only in very few, particular, cases.

32

1 If the case of a finite cylinder,  $\langle n_{3D}(A) \rangle \leq \#(\mathcal{R}_{s,A}) \leq \#(\mathcal{R}_{1,A})$  leads, suming up  
2 to all the seeds and dividing by  $M$ , to the upper bound

$$3 \quad \langle n_{3D}(s) \rangle \leq \frac{1}{M} \cdot \sum_A \#(\mathcal{R}_{1,A}) \quad (9)$$

5  
6 thus,  $\langle n_{3D}(s) \rangle$  is necessarily a bounded function. This expression indicates  
7 that the number of new neighbours when increasing  $s$  exhausts since the  
8 number of cells is a resource shared by all the layers. It is possible to obtain  
9 an upper bound to  $\langle N_{max} \rangle = \lim_{s \rightarrow \infty} \langle n_{3D}(s) \rangle$  since, after a flip in the Delaunay  
10 triangulation, the edge disappearing (i.e., a cell contact loss) can never be  
11 recovered in a cylindrical geometry. Thus,  $M \cdot (\langle N_{max} \rangle - n_{3D}(1))$  is bounded  
12 by the number of edges that complement the original Delaunay triangulation  
13 on the apical surface, that is,

$$14 \quad \langle N_{max} \rangle - \langle n_{3D}(1) \rangle \leq \frac{1}{M} \cdot \left( \frac{M(M-1)}{2} - M \frac{\langle n_{3D}(1) \rangle}{2} \right) = \frac{M-1}{2} - \frac{\langle n_{3D}(1) \rangle}{2} \quad (10)$$

16 leading to

$$17 \quad \langle N_{max} \rangle \leq \frac{M-1}{2} + \frac{\langle n_{3D}(1) \rangle}{2} \leq \frac{M-1}{2} + 3 = \frac{M+5}{2} \quad (11)$$

18 Where we have assumed that  $\langle n_{3D}(1) \rangle = 6$ . The simulations of the  
19 computational Voronoi model and the data of the salivary gland show that  
20  $\langle N_{max} \rangle$  is in fact much smaller that the theoretical bound  $\frac{M+5}{2}$ .

21

## 22 **Relation between total accumulated 3D neighbors and the number of** 23 **intercalation events**

24 Scutoids have a Euler characteristic  $\chi = 2$  such that  $V - E + F = 2$ , where  $V$ ,  
25  $E$ , and  $F$  accounts for the number of vertexes, edges, and faces respectively.  
26 We assumed that the apical,  $a$ , and basal,  $b$ , faces of scutoids tesellating a  
27 cylindrical space have radial coordinates  $R_a$  and  $R_b$  respectively. Then, for any  
28 value of the surface ratio expansion,  $s = R/R_a$ , these solids can be mapped  
29 into a connected plane graph with the same Euler characteristic (a sort of  
30 projection of the vertexes and connectors into the plane, see **Fig. S5**. Thus, as  
31 a function of  $s$ , the accumulated number of 3D neighbors reads  $n_{3D}(s) =$   
32  $E(s) - V(s)$ . Since in tubular geometries the radially projected seeds from the

1 apical to the basal surface never come closer, as  $s$  increases (i.e., apico-basal  
2 intercalations are not reversible).

$$3 \quad n_{3D}(s) = \max(\{V(s)\}) = \min(\{V(s)\}) + i(s) \quad (12)$$

4 where  $\{V(s)\} = \{V(1), V(1 + ds), \dots, V(s_b)\}$  and  $i(s)$  denotes the number of  
5 intercalation points in the interval  $s \in [1, s_b]$ . In the case of a 3D tessellation  
6 with  $N$  cells, where  $M$  of them do not show any intercalation, the total number  
7 of accumulated neighbors reads,

$$\begin{aligned} 8 \quad n_{3D}(s) &= \sum_{j=1}^N n_{3D}^{(j)}(s) = \sum_{j=1}^M V^{(j)}(1) + \sum_{j=1}^{N-M} \max(\{V^{(j)}(s)\}) = \\ 9 \quad &\sum_{j=1}^M V^{(j)}(1) + \sum_{j=1}^{N-M} \{\min(\{V^{(j)}(s)\}) + i^{(j)}(s)\} \\ 10 \quad &(13) \end{aligned}$$

11 Given that each intercalation point is shared by four cells, two of them  
12 necessarily increase their number of vertices in a given  $s$ -plane and two of  
13 them decrease their number of vertices (see **Fig. 1A**). Thus, in the case of a  
14 decrease  $\max(\{V^{(j)}(s)\}) = V^{(j)}(1)$  and in the case of an increase  
15  $\min(\{V^{(j)}(s)\}) + i^{(j)}(s) = V^{(j)}(1) + i^{(j)}(s)$ . Consequently,

$$16 \quad n_{3D}(s) = \sum_{j=1}^N V^{(j)}(1) + \sum_{j=1}^{(N-M)/2} i^{(j)}(s) = \sum_{j=1}^N V^{(j)}(1) + \frac{1}{2} \sum_{j=1}^{N-M} i^{(j)}(s) \quad (14)$$

17 where we used the fact that for every intercalation event that increases by  
18 one the number of neighbors there is one that decreases the number of  
19 neighbors in the same amount; consequently, we can add up all intercalation  
20 events and divide by two. Hence the average number of accumulated 3D  
21 neighbors,  $\langle n_{3D}(s) \rangle = n_{3D}(s)/N$  reads  $\langle n_{3D}(s) \rangle = \langle V(1) \rangle + \langle i(s) \rangle/2$ ;  $\langle i(s) \rangle$   
22 being the average number of apico-basal intercalations per cell. Finally, by  
23 considering that any  $s$ -surface, and in particular the apical surface  $s = 1$ ,  
24 corresponds to a 2D tessellation of convex polygons,  $\langle V(1) \rangle = 6$  we conclude  
25 that,

$$26 \quad \langle n_{3D}(s) \rangle = 6 + \frac{1}{2} \langle i(s) \rangle \quad (15)$$

27

28 **A Kolmogorov rate equation for the 3D cellular connectivity**

1 The probability,  $P$ , of having  $m$  accumulated 3D neighbors (i.e.,  $m = n_{3D}$ ) as  
 2 the surface ratio increases from  $s$  to  $s + ds$  can be described by the following  
 3 Markov equation (**Fig. 4B**),

$$4 \quad P_m(s + ds) = P_m(s)T_{m,m} + P_{m-1}(s)T_{m-1,m} \quad (16)$$

5 where  $T_{i,j}$  is the probability of incrementing the number of neighbors from  $i$  to  $j$   
 6 due to an apico-basal intercalation. Since  $\sum_j T_{i,j} = 1$  (normalization of the  
 7 transition probabilities) and  $T_{i,j} = f(i,j)\{\delta_{i-1,j} + \delta_{i,j+1}\}$  (each intercalation can  
 8 only possibly induce to win one neighbor) then  $T_{m,m} = 1 - T_{m,m+1}$  and the  
 9 above Markov equation can be written as a Kolmogorov equation (a.k.a.  
 10 Master equation):

$$11 \quad \frac{dP_m(s)}{ds} = P_{m-1}(s)r_{m-1,m} - P_m(s)r_{m,m+1} \quad (17)$$

12 where  $r_{i,j}$  accounts for the probability of apico-basal intercalations per unit of  
 13 surface ratio, i.e.,  $T_{i,j} = r_{i,j}ds$ .

14 If we assume an Arrhenius-like kinetics (i.e., in order to win an additional  
 15 neighbor there is an energy cost, see (Bi et al., 2014)) then  $r_{i,i+1} = \hat{\alpha}e^{-\Delta E_i}$ ,  
 16 where  $\hat{\alpha}$  is the so-called pre-exponential factor that modulates the “bare”  
 17 frequency of intercalations (per unit of surface ratio expansion) and  $\Delta E_i$  is the  
 18 activation energy in some energy units. In our case in units of  $E_0$ : the value of  
 19 the energetic barrier of the four-fold vertex configuration (**Fig. 4A**). The  
 20 observed “poor get richer” behavior suggests that the activation energy,  $\Delta E_i$ ,  
 21 increases with  $i$ . For the sake of simplicity, up to first order in  $i$ :  $\Delta E_i = i \cdot \beta$  ( $\beta$   
 22 being the dimensionless activation energy of a cell per 3D neighbor in units of  
 23  $E_0$ ). On the other hand, the mathematical calculations (see Eq. (9)) indicate  
 24 that the intercalation rate  $r_{i,i+1}$  becomes null for a finite value of  $i$  or,  
 25 alternatively, that the activation energy becomes infinite for a finite value of  $i$ .  
 26 Otherwise, the net gain of new neighbors is not bounded. This fact can be  
 27 accounted for by assuming that the bare frequency is a function of the number  
 28 of neighbors,  $\hat{\alpha} = \hat{\alpha}(i)$ , such that  $\frac{d\hat{\alpha}}{di} < 0$  and becomes null for a finite value of  
 29  $i$ . Again, for the sake of simplicity, we assume that up to first order in  $i$ :  
 30  $\hat{\alpha} = \alpha(N_{max} - i)$ , where  $N_{max}$  is the asymptotic, maximum, number of 3D

1 neighbors a cell can possibly have. Summarizing, we assume that the apico-  
2 basal intercalation rate  $r_{i,i+1}$  reads,

$$3 \quad r_{i,i+1} = \alpha(N_{max} - i)e^{-i\beta} \quad (18)$$

4 Under these conditions, the Kolmogorov equation reads,

$$5 \quad \frac{dP_m(s)}{ds} = \alpha(N_{max} - (m-1))e^{-\beta(m-1)}P_{m-1}(s) - \alpha(N_{max} - m)e^{-\beta m}P_m(s) \\ 6 \quad (19)$$

7 On the other hand, the equation satisfied by the average number of  
8 accumulated 3D neighbors,  $\langle n_{3D} \rangle = \langle m \rangle$ , reads,

$$9 \quad \frac{d\langle m(s) \rangle}{ds} = \sum_m m \frac{dP_m(s)}{ds} = \sum_m r_{m,m+1}P_m(s) = \langle r_{m,m+1} \rangle \quad (20)$$

10 Alternatively, in order to obtain an analytical expression able to recapitulate,  
11 effectively, the mathematical principle that govern the net gain of 3D  
12 neighbors, we perform the following approximations. First, we perform a  
13 mean-field-like approximation, i.e.,  $\langle F(m) \rangle \approx F(\langle m \rangle)$ ,

$$14 \quad \frac{d\langle m \rangle}{ds} \approx \alpha(\langle N_{max} \rangle - \langle m \rangle)e^{-\beta\langle m \rangle} \quad (21)$$

15 Where  $\langle N_{max} \rangle$  is the limiting average cellular connectivity. Second, since  $\beta <$   
16 1,

$$17 \quad \frac{d\langle m \rangle}{ds} \approx \alpha(\langle N_{max} \rangle - \langle m \rangle)(1 - \beta\langle m \rangle) + \mathcal{O}(\beta^2) \quad (22)$$

18 Equation (21) is formally a logistic-like growth equation,

$$19 \quad \frac{d\langle m \rangle}{ds} = \frac{b}{c(b-d)} (\langle N_{max} \rangle - \langle m \rangle) \left(1 - \frac{d}{bN_{max}} \langle m \rangle\right) \quad (23)$$

20 that has as solution,

$$21 \quad \langle m(s) \rangle = \langle N_{max} \rangle \frac{1 + be^{-\frac{s}{c}}}{1 + de^{-\frac{s}{c}}} \quad (24)$$

22 Thus, if  $c > 0$  then  $\lim_{s \rightarrow \infty} \langle m(s) \rangle = \langle N_{max} \rangle$ . The parameters  $b$ ,  $c$ , and  $d$  are  
23 further constrained by the following facts:  $\frac{d\langle m \rangle}{ds} > 0$  (3D neighbors can only  
24 accumulate) and  $\frac{d^2\langle m \rangle}{ds^2} < 0$  ("poor get richer" principle). Moreover, if we impose  
25 the condition  $\langle m(1) \rangle = 6$  (the average number of neighbors in the apical  
26 surface is 6) these parameters are not independent since,

$$b = \frac{6d - (\langle N_{max} \rangle - 6)e^{\frac{1}{c}}}{\langle N_{max} \rangle} \quad (25)$$

All the above implies that the logistic-like fitting function, Eq. (24), describes, approximately but effectively, the analytical mathematical law (“Flintstone’s law”) underlying the 3D average connectivity if the following conditions hold, either  $-1 < d < 0$  or  $c \ln(-d) < 1$  if  $d < -1$ .

The relation between the fitting parameters of the logistic fitting with  $\alpha$  and  $\beta$  are,

$$\alpha = \frac{b}{c(b-d)} \quad (26)$$

$$\beta = \frac{d}{b \langle N_{max} \rangle} \quad (27)$$

For finding the parameters  $\alpha$  and  $\beta$  in *in silico* tubes and salivary glands we then implemented two possible approaches. On the one hand, we implemented an error minimization algorithm that recursively solved, numerically, Eq. (20) to obtain  $\langle m(s) \rangle = \sum_m m P_m(s)$  taking also into account the normalization condition  $\sum_{m=1}^{\infty} P_m(s) = 1$  (code available at <https://osf.io/nd5t6>).

On the other hand, we obtained values using the fitting logistic function Eq. (24). We notice that the values obtained through the first method are exact as compared to the values obtained from the fitting that are based on a series of approximations as explained above (see **Table S1**).

The values of  $\alpha$  and  $\beta$  are obtained from the exact methodology were further used to compare the predicted probability distribution of having  $m$  accumulated neighbors for a given value of  $s$ :  $P_m(s)$ . We evaluated the relative error of this prediction with respect to the actual distribution from data,  $P_m^{actual}(s)$ , by computing  $\varepsilon^2 = \frac{1}{2} \sum_m \left( P_m^{actual}(s) - P_m(s) \right)^2$ . This quantity is normalized such that in case of the following situation of full disagreement between the distributions,  $P_m^{actual}(s) = \delta_{m,i}$  and  $P_m(s) = \delta_{m,j}$  with  $i \neq j$ , provides  $\varepsilon^2 = 1$  (i.e., 100% error).

**Quantitative characterization of spreading in neighbor exchange distributions between apical and basal surfaces**

1 In order to characterize the spreading away from the diagonal in the neighbor  
2 exchange distributions between apical and basal surfaces, **Fig. 2A-B**, we  
3 followed the same approach used to quantify intrinsic noise during gene  
4 expression processes (see (Elowitz, 2002). Thus,  $\eta^2 = \frac{\langle (n_a - n_b)^2 \rangle}{2\langle n_a \rangle \langle n_b \rangle}$  where  
5  $\langle z(n_a, n_b) \rangle = \sum_{n_a, n_b} z(n_a, n_b) p(n_a, n_b)$ ;  $z$  representing any function of  $n_a$  and  $n_b$   
6 and  $p(n_a, n_b)$  being the probability of neighbor exchange events.

## 7 **Logistic data fitting**

8 To obtain the logistic function that fit best our data points, we analyzed all the  
9 possible parameters combination and achieved the global minimum solution.  
10 This ‘fit’ was based on the ‘least squares’ method and minimizes the residual  
11  $r = \sum_{i=1}^n (y_i - y'_i)^2$  where,  $y_i$  and  $y'_i$  stand for the observed values and the  
12 fitted ones, respectively. The logistic equation (Eq. (24)):

$$13 \quad f(s) = \langle N_{max} \rangle \frac{1 + b e^{-\frac{s}{c}}}{1 + d e^{-\frac{s}{c}}} \quad (28)$$

14 was then fitted to find the average 3D cell connectivity, but with a series of  
15 constraints on the parameters (as explained above):  $\langle f(s=1) \rangle = 6$ ,  $c >$   
16  $0$ ,  $d < 0$ ,  $\langle N_{max} \rangle \geq 0$ ,  $d > b$  and if  $d < -1$  then  $c \ln(-d) < 1$ . The goodness  
17 of fitting was estimated by means of the coefficient of determination,  $R^2$ .

18

## 19 **Data availability**

20 All the necessary material to reproduce this study is available at the Center for  
21 Open Science repository: <https://osf.io/nd5t6>.

22

23



# 1 REFERENCES

- 2 Aldaz, S., Escudero, L.M., and Freeman, M. (2013). Dual role of myosin II  
3 during *Drosophila* imaginal disc metamorphosis. *Nat. Commun.* **4**, 1761.
- 4 Alt, S., Ganguly, P., and Salbreux, G. (2017). Vertex models: from cell  
5 mechanics to tissue morphogenesis. *Philos. Trans. R. Soc. B Biol. Sci.* **372**,  
6 20150520.
- 7 Ambrosini, A., Gracia, M., Proag, A., Rayer, M., Monier, B., and Suzanne, M.  
8 (2017). Apoptotic forces in tissue morphogenesis. *Mech. Dev.* **144**, 33–42.
- 9 Arganda-Carreras, I., Kaynig, V., Rueden, C., Eliceiri, K.W., Schindelin, J.,  
10 Cardona, A., and Sebastian Seung, H. (2017). Trainable Weka Segmentation:  
11 a machine learning tool for microscopy pixel classification. *Bioinformatics* **33**,  
12 2424–2426.
- 13 Bassel, G.W., Stamm, P., Mosca, G., Barbier de Reuille, P., Gibbs, D.J.,  
14 Winter, R., Janka, A., Holdsworth, M.J., and Smith, R.S. (2014). Mechanical  
15 constraints imposed by 3D cellular geometry and arrangement modulate  
16 growth patterns in the *Arabidopsis* embryo. *Proc. Natl. Acad. Sci.* **111**, 8685–  
17 8690.
- 18 Bertet, C., Sulak, L., and Lecuit, T. (2004). Myosin-dependent junction  
19 remodelling controls planar cell intercalation and axis elongation. *Nature* **429**,  
20 667–671.
- 21 Bi, D., Lopez, J.H., Schwarz, J.M., and Lisa Manning, M. (2014). Energy  
22 barriers and cell migration in densely packed tissues. *Soft Matter* **10**, 1885–  
23 1890.
- 24 Bi, D., Lopez, J.H., Schwarz, J.M., and Manning, M.L. (2015). A density-  
25 independent rigidity transition in biological tissues. *Nat. Phys.* **11**, 1074–1079.
- 26 Bonnefont, X., Lacampagne, A., Sanchez-Hormigo, A., Fino, E., Creff, A.,  
27 Mathieu, M.-N., Smallwood, S., Carmignac, D., Fontanaud, P., Travo, P., et al.  
28 (2005). Revealing the large-scale network organization of growth hormone-  
29 secreting cells. *Proc. Natl. Acad. Sci.* **102**, 16880–16885.
- 30 Box, K., Joyce, B.W., and Devenport, D. (2019). Epithelial geometry regulates  
31 spindle orientation and progenitor fate during formation of the mammalian  
32 epidermis. *Elife* **8**, e47102.
- 33 Campàs, O., Mammoto, T., Hasso, S., Sperling, R.A., O’Connell, D., Bischof,  
34 A.G., Maas, R., Weitz, D.A., Mahadevan, L., and Ingber, D.E. (2014).  
35 Quantifying cell-generated mechanical forces within living embryonic tissues.  
36 *Nat. Methods* **11**, 183–189.
- 37 Canela-Xandri, O., Sagués, F., Casademunt, J., and Buceta, J. (2011).  
38 Dynamics and Mechanical Stability of the Developing Dorsoventral Organizer  
39 of the Wing Imaginal Disc. *PLoS Comput. Biol.* **7**, e1002153.
- 40 Clevers, H. (2016). Modeling Development and Disease with Organoids. *Cell*  
41 **165**, 1586–1597.
- 42 Colas, J.-F., and Schoenwolf, G.C. (2001). Towards a cellular and molecular  
43 understanding of neurulation. *Dev. Dyn.* **221**, 117–145.
- 44 Curran, S., Strandkvist, C., Bathmann, J., de Gennes, M., Kabla, A., Salbreux,  
45 G., and Baum, B. (2017). Myosin II Controls Junction Fluctuations to Guide  
46 Epithelial Tissue Ordering. *Dev. Cell* **43**, 480-492.e6.

- 1 Elowitz, M.B. (2002). Stochastic Gene Expression in a Single Cell. *Science*  
2 (80-. ). 297, 1183–1186.
- 3 Farhadifar, R., Röper, J.-C., Aigouy, B., Eaton, S., and Jülicher, F. (2007). The  
4 Influence of Cell Mechanics, Cell-Cell Interactions, and Proliferation on  
5 Epithelial Packing. *Curr. Biol.* 17, 2095–2104.
- 6 Fletcher, A.G., Osterfield, M., Baker, R.E., and Shvartsman, S.Y. (2014).  
7 Vertex models of epithelial morphogenesis. *Biophys. J.* 106, 2291–2304.
- 8 Gibson, M.C., Patel, A.B., Nagpal, R., and Perrimon, N. (2006). The  
9 emergence of geometric order in proliferating metazoan epithelia. *Nature* 442,  
10 1038–1041.
- 11 Gibson, W.T., Veldhuis, J.H., Rubinstein, B., Cartwright, H.N., Perrimon, N.,  
12 Brodland, G.W., Nagpal, R., and Gibson, M.C. (2011). Control of the mitotic  
13 cleavage plane by local epithelial topology. *Cell* 144, 427–438.
- 14 Gilbert, S.F., and Barresi, M.J.F. (2016). *Developmental biology* (Sunderland,  
15 MA Sinauer Associates).
- 16 Girdler, G.C., and Röper, K. (2014). Controlling cell shape changes during  
17 salivary gland tube formation in *Drosophila*. *Semin. Cell Dev. Biol.* 31, 74–81.
- 18 Gómez-Gálvez, P., Vicente-Munuera, P., Tagua, A., Forja, C., Castro,  
19 A.M.A.M., Letrán, M., Valencia-Expósito, A., Grima, C., Bermúdez-Gallardo,  
20 M., Serrano-Pérez-Higueras, Ó., et al. (2018). Scutoids are a geometrical  
21 solution to three-dimensional packing of epithelia. *Nat. Commun.* 9, 2960.
- 22 Heller, D., Hoppe, A., Restrepo, S., Gatti, L., Tournier, A.L.L., Tapon, N.,  
23 Basler, K., and Mao, Y. (2016). EpiTools: An Open-Source Image Analysis  
24 Toolkit for Quantifying Epithelial Growth Dynamics. 36, 103–116.
- 25 Hirashima, T., and Adachi, T. (2019). Polarized cellular mechano-response  
26 system for maintaining radial size in developing epithelial tubes. *Development*  
27 146, dev181206.
- 28 Honda, H. (1978). Description of cellular patterns by Dirichlet domains: the  
29 two-dimensional case. *J Theor Biol* 72, 523–543.
- 30 Huch, M., Knoblich, J.A., Lutolf, M.P., and Martinez-Arias, A. (2017). The hope  
31 and the hype of organoid research. *Dev.* 144, 938–941.
- 32 Huebner, R.J., and Ewald, A.J. (2014). Cellular foundations of mammary  
33 tubulogenesis. *Semin. Cell Dev. Biol.* 31, 124–131.
- 34 Inoue, Y., Tateo, I., and Adachi, T. (2019). Epithelial tissue folding pattern in  
35 confined geometry. *Biomech. Model. Mechanobiol.*
- 36 Iruela-Arispe, M.L., and Beitel, G.J. (2013). Tubulogenesis. *Development* 140,  
37 2851–2855.
- 38 Irvine, K.D., and Wieschaus, E. (1994). Cell intercalation during *Drosophila*  
39 germband extension and its regulation by pair-rule segmentation genes.  
40 *Development* 120, 827–841.
- 41 Khan, Z., Wang, Y.-C., Wieschaus, E.F., and Kaschube, M. (2014).  
42 Quantitative 4D analyses of epithelial folding during *Drosophila* gastrulation.  
43 *Development* 141, 2895–2900.
- 44 Latorre, E., Kale, S., Casares, L., Gómez-González, M., Uroz, M., Valon, L.,  
45 Nair, R. V., Garreta, E., Montserrat, N., del Campo, A., et al. (2018). Active  
46 superelasticity in three-dimensional epithelia of controlled shape. *Nature* 563,  
47 203–208.

- 1 Leptin, M., and Grunewald, B. (1990). Cell shape changes during gastrulation  
2 in *Drosophila*. *Development* 110, 73–84.
- 3 Lewis, F.T. (1928). The correlation between cell division and the shapes and  
4 sizes of prismatic cells in the epidermis of cucumis. *Anatom. Rec.* 38, 341–  
5 376.
- 6 Lloyd, S. (1982). Least squares quantization in PCM. *IEEE Trans. Inf. Theory*  
7 28, 129–137.
- 8 Machado, S., Mercier, V., and Chiaruttini, N. (2019). LimeSeg: a coarse-  
9 grained lipid membrane simulation for 3D image segmentation. *BMC*  
10 *Bioinformatics* 20, 2.
- 11 Mao, Y., Tournier, A.L., Hoppe, A., Kester, L., Thompson, B.J., and Tapon, N.  
12 (2013). Differential proliferation rates generate patterns of mechanical tension  
13 that orient tissue growth. *EMBO J.* 32, 2790–2803.
- 14 Messal, H.A., Alt, S., Ferreira, R.M.M., Gribben, C., Wang, V.M.-Y., Cotoi,  
15 C.G., Salbreux, G., and Behrens, A. (2019). Tissue curvature and apicobasal  
16 mechanical tension imbalance instruct cancer morphogenesis. *Nature* 566,  
17 126.
- 18 Misra, M., Audoly, B., and Shvartsman, S.Y. (2017). Complex structures from  
19 patterned cell sheets. *Philos. Trans. R. Soc. B Biol. Sci.* 372, 20150515.
- 20 Mongera, A., Rowghanian, P., Gustafson, H.J., Shelton, E., Kealhofer, D.A.,  
21 Carn, E.K., Serwane, F., Lucio, A.A., Giammona, J., and Campàs, O. (2018).  
22 A fluid-to-solid jamming transition underlies vertebrate body axis elongation.  
23 *Nature* 561, 401–405.
- 24 Mughal, A., Cox, S.J., Weaire, D., Burke, S.R., and Hutzler, S. (2018).  
25 Demonstration and interpretation of ‘scutoid’ cells formed in a quasi-2D soap  
26 froth. *Philos. Mag. Lett.* 98, 358–364.
- 27 Nelson, C.M. (2009). Geometric control of tissue morphogenesis. *Biochim.*  
28 *Biophys. Acta - Mol. Cell Res.* 1793, 903–910.
- 29 Nelson, C.M., Jean, R.P., Tan, J.L., Liu, W.F., Sniadecki, N.J., Spector, A.A.,  
30 and Chen, C.S. (2005). Emergent patterns of growth controlled by multicellular  
31 form and mechanics. *Proc. Natl. Acad. Sci.* 102, 11594–11599.
- 32 Okuda, S., Kuranaga, E., and Sato, K. (2019). Apical Junctional Fluctuations  
33 Lead to Cell Flow while Maintaining Epithelial Integrity. *Biophys. J.* 116, 1159–  
34 1170.
- 35 Pérez-González, C., Alert, R., Blanch-Mercader, C., Gómez-González, M.,  
36 Kolodziej, T., Bazellieres, E., Casademunt, J., and Trepát, X. (2019). Active  
37 wetting of epithelial tissues. *Nat. Phys.* 15, 79–88.
- 38 Pilot, F., and Lecuit, T. (2005). Compartmentalized morphogenesis in  
39 epithelia: from cell to tissue shape. *Dev Dyn* 232, 685–694.
- 40 Reinhardt, K. (1918). Über die Zerlegung der Ebene in Polygone.
- 41 Röper, K. (2018). Quantitative Imaging and the Effect of Tissue Topology on  
42 Morphogenesis. *Dev. Cell* 47, 537–538.
- 43 Rupprecht, J.F., Ong, K.H., Yin, J., Huang, A., Dinh, H.H.Q., Singh, A.P.,  
44 Zhang, S., Yu, W., and Saunders, T.E. (2017). Geometric constraints alter cell  
45 arrangements within curved epithelial tissues. *Mol. Biol. Cell* 28, 3582–3594.
- 46 Sanchez-Corrales, Y.E., Blanchard, G.B., and Röper, K. (2018). Radially  
47 patterned cell behaviours during tube budding from an epithelium. *Elife* 7,

1 e35717.

2 Sánchez-Gutiérrez, D., Tozluoglu, M., Barry, J.D., Pascual, A., Mao, Y., and  
3 Escudero, L.M. (2016). Fundamental physical cellular constraints drive self-  
4 organization of tissues. *EMBO J.* 35, 77–88.

5 Schindelin, J., Arganda-Carreras, I., Frise, E., Kaynig, V., Longair, M.,  
6 Pietzsch, T., Preibisch, S., Rueden, C., Saalfeld, S., Schmid, B., et al. (2012).  
7 Fiji: an open-source platform for biological-image analysis. *Nat. Methods* 9,  
8 676–682.

9 Schutgens, F., Rookmaaker, M.B., Margaritis, T., Rios, A., Ammerlaan, C.,  
10 Jansen, J., Gijzen, L., Vormann, M., Vonk, A., Viveen, M., et al. (2019).  
11 Tubuloids derived from human adult kidney and urine for personalized disease  
12 modeling. *Nat. Biotechnol.* 37, 303–313.

13 Shahbazi, M.N., Siggia, E.D., and Zernicka-Goetz, M. (2019). Self-  
14 organization of stem cells into embryos: A window on early mammalian  
15 development. *Science* (80-. ). 364, 948–951.

16 Sharma, P., Saraswathy, V.M., Xiang, L., and Furthauer, M. (2019).  
17 Delta/Notch signaling controls neuroepithelial morphogenesis in the zebrafish  
18 spinal cord. *BioRxiv* 517714.

19 Siedlik, M.J., Manivannan, S., Kevrekidis, I.G., and Nelson, C.M. (2017). Cell  
20 Division Induces and Switches Coherent Angular Motion within Bounded  
21 Cellular Collectives. *Biophys. J.* 112, 2419–2427.

22 Spencer, M.A., Jabeen, Z., and Lubensky, D.K. (2017). Vertex stability and  
23 topological transitions in vertex models of foams and epithelia. *Eur. Phys. J. E*  
24 40, 2.

25 Sugimura, K., Lenne, P.-F.F., and Graner, F. (2016). Measuring forces and  
26 stresses in situ in living tissues. *Development* 143, 186–196.

27 Swanson, L.E., and Beitel, G.J. (2006). Tubulogenesis: an inside job. *Curr Biol*  
28 16, R51-3.

29 Tetley, R.J., Staddon, M.F., Heller, D., Hoppe, A., Banerjee, S., and Mao, Y.  
30 (2019). Tissue fluidity promotes epithelial wound healing. *Nat. Phys.* 15, 1195–  
31 1203.

32 Thompson, D.W.D. (1945). *On growth and form* (Cambridge university press).

33 Treppe, X., Wasserman, M.R., Angelini, T.E., Millet, E., Weitz, D.A., Butler,  
34 J.P., and Fredberg, J.J. (2009). Physical forces during collective cell migration.  
35 *Nat. Phys.* 5, 426–430.

36 Tung, J.J., Tattersall, I.W., and Kitajewski, J. (2012). Tips, Stalks, Tubes:  
37 Notch-Mediated Cell Fate Determination and Mechanisms of Tubulogenesis  
38 during Angiogenesis. *Cold Spring Harb. Perspect. Med.* 2, a006601–a006601.

39 Wetzel, G. (1926). Zur entwicklungsmechanischen Analyse des einfachen  
40 prismatischen Epithels. *Wilhelm Roux Arch. Für Entwicklungsmechanik Der*  
41 *Org.* 107, 177–185.

42 Yang, R., Li, E., Kwon, Y.-J., Mani, M., and Beitel, G.J. (2019). QuBiT: a  
43 quantitative tool for analyzing epithelial tubes reveals unexpected patterns of  
44 organization in the *Drosophila* trachea. *Development* 146, dev172759.

45 Yang, X., Bi, D., Czajkowski, M., Merkel, M., Manning, M.L., and Marchetti,  
46 M.C. (2017). Correlating cell shape and cellular stress in motile confluent  
47 tissues. *Proc. Natl. Acad. Sci.* 114, 12663–12668.

1  
2

1 **Figure 1. Analysis of apico-basal cell intercalations in the Voronoi**  
2 **tubular model**

3 **A)** Scutoids (left) entail apico-basal intercalations among packing cells that  
4 can be envisioned as *spatial* T1 transitions to exchange neighbors (right). The  
5 green and the red cells are neighbors in basal (but not in apical) while the  
6 opposite is true for the blue and the yellow cells. **B)** Voronoi *in silico* tubes with  
7 different surface ratios,  $s_b$ :  $s_b = 2$  indigo blue;  $s_b = 5$ , dark blue (apical  
8 surface, light blue). **C)** For a given radial section (plane), cell boundaries  
9 emerge by applying a Voronoi tessellation to a number of seeds located in the  
10 plane. In the V1 (Voronoi 1) model seeds are randomly distributed. By  
11 applying iteratively the Lloyd algorithm (left to right) the topological disorder  
12 diminishes (**Materials and Methods**). **D)** The density plot shows the average  
13 number of apico-basal intercalations per cell in *in silico* tubes ( $n = 20$ ) as a  
14 function of the surface ratio and the Voronoi class.  
15

1 **Figure 2. Three-dimensional packing and connectivity properties of the**  
2 **Voronoi tubular model**

3 **A)** A schematic representation of a 3D histogram (density plot) where all cells  
4 have prismatic-like shapes (i.e., in the absence of scutoids). The histogram  
5 accounts for the probability that cells have  $n_a$  (number) of neighbors in the  
6 apical surface and  $n_b$  neighbors in the basal surface. If there are no scutoids,  
7 there are only contributions in the diagonal bins whereas if there are scutoids  
8 the distribution spreads away from the diagonal. **B)** 3D histograms of V5 tubes  
9 for increasing values of the surface ratio. The larger value of the spreading  
10 coefficient,  $\eta^2$ , (**Material and Methods**) indicates an increasing number of  
11 scutoids. **C)** and **D)** Density plots showing  $\eta^2$  (**C**) and the average number of  
12 3D neighbors,  $\langle n_{3D} \rangle$ , (**D**) as a function of the surface ratio and the Voronoi  
13 class in *in silico* tubes ( $n = 20$ ).  
14  
15

1 **Figure 3. Cells in the Voronoi tubular model follow a “poor get richer”**  
2 **principle**

3 **A)** Average net gain of neighbors (density plot) with respect to the apical  
4 surface in Voronoi tubes with a surface ratio  $s_b = 5$  as a function of the  
5 Voronoi class and the apical polygonal class ( $n = 20$ ). Cells with a smaller  
6 polygonal class are more prone to gain neighbors. **B)** “Poor get richer”  
7 principle in V5 tubes with a surface ratio  $s_b = 5$ . The size of the circle accounts  
8 for the relative data count within each apical polygon class (numbers indicate  
9 the number of cells that gained 3D neighbors). The boxes indicate the  
10 25% – 75% percentile interval, black lines the mean values, gray lines the  
11 standard deviation, and the red dotted lines the statistical median.



1 **Box. In tubular geometries the 3D cellular connectivity gain decreases as**  
2 **the surface ratio increases and it is bounded. A)** This panel shows,  
3 schematically, an apico-basal intercalation from the point of view of a Voronoi  
4 diagram and its topological dual, the Delaunay triangulation. Small solid circles  
5 indicate the seeds of Voronoi cells and large circles show the Delaunay  
6 property graphically: nearest neighbors define triangles (cells' seeds being  
7 their vertices) and circumscribed circles. For example, in the apical surface,  
8 the nearest neighbors of the red seed are those seeds at the circumscribed  
9 red circle. Likewise, the nearest neighbors of the green seed are those seeds  
10 in the green circle. Once the transition takes place, the seeds in each of the  
11 circles are nearest neighbors of the red and the green seeds. **B)** Before the  
12 apico-basal intercalation shown in **A)** occurs, the green seed is necessarily  
13 outside the circumscribed circle (otherwise it would be a nearest neighbor of  
14 the red seed). *Lemma 1 (Materials and Methods)* states that if the green  
15 seed is going to become a nearest neighbor of the red seed due to an apico-  
16 basal transition then it is contained inside the parabola. As consequence of  
17 this, the 3D cellular connectivity gain decreases as the surface ratio increases:  
18 panels **C)-E)**. In this example, **C)-E)**, the Y axis represents the longitudinal  
19 axis of tubes, while the X axis accounts for the Cartesian projection of the  
20 transversal axis of radial sections. From left to right different radial sections  
21 are represented as  $s$  increases (as indicated by the color gradient arrow: from  
22 light to dark blue). In **C)** three Voronoi seeds that correspond to neighboring  
23 cells at the apical surface,  $s = 1$ , define the triangle  $ABC$ . Panels **D)** and **E)**  
24 track changes in the neighboring relations (accumulated neighbors) of cell  $A$   
25 for two increasing values of  $s$ : 2 and 4.5 (panels **D)** and **E)** respectively). As  
26 shown in **C)**, should a new neighboring cell,  $D$ , of cell  $A$  appear due to an  
27 apico-basal intercalation, then its position must lie inside the vertical parabola  
28 defined by the points  $A$ ,  $B$  and  $C$ , but outside the circle that these points define  
29 (white region), (*Lemma 1*). Regions accessible to new neighbors are then  
30 coded by the green shading in **C)-E)**. As  $s$  increases, see **D)**, and the cells  $A$ ,  
31  $B$ ,  $C$ , and  $D$  become neighbors, then the parabolas and circles defined by  $ABD$   
32 and  $ACD$  restrict the locations of future nearest neighbors. This idea is further  
33 reinforced in panel **E)**: winning neighbor  $E$  set additional limits to the

- 1 accessible locations of new neighbors. Thus, the potentiality of a connectivity
- 2 gain by cell  $A$  due to apico-basal intercalations diminishes as the surface ratio
- 3 increases and eventually becomes null: the number of 3D neighbors of a cell
- 4 is bounded (**Materials and Methods**).

1 **Figure 4. A probabilistic model reproduces the 3D cell connectivity**  
2 **behavior of epithelial tubes.**

3 **A)** Top: in tubular geometries, cell intercalations along the apico-basal axis  
4 can be visualized as non-reversible spatial T1 transitions (once a neighbor is  
5 won it cannot be lost). Bottom: the “poor get richer” principle suggests an  
6 increasing energetic cost (i.e., a larger activation energy) for recruiting new 3D  
7 neighbors. In our model,  $\beta$  accounts for the energetic cost per 3D neighbor to  
8 recruit a new neighbor (**Materials and Methods**). **B)** The energy landscape  
9 shown in **A)** can be modeled by a stochastic dynamics (a Kolmogorov rate  
10 equation) where cells increase their 3D neighbors with a probability per unit of  
11 surface ratio,  $r_{n,m}$ , that depends on the activation energy and the maximum  
12 cell connectivity  $N_{max}$  (**Material and Methods**). **C)** Comparison between  
13 results obtained in the Kolmogorov model and simulations of V5 *in silico* tubes.  
14 The left/center density plots represent the connectivity distribution (i.e., the  
15 fraction of cells with a given number of 3D neighbors) as a function of the  
16 radial expansion obtained in the Voronoi simulation (left) and as predicted by  
17 the Kolmogorov model (center); the purple open circles (left/right) indicate the  
18 average number of 3D neighbors per cell  $\langle n_{3D} \rangle$ ; the solid red line and the  
19 dashed white line (center/right) shows  $\langle n_{3D} \rangle$  as obtained by the Kolmogorov  
20 model and the Flintstones’ law respectively. The density plot on the right  
21 shows the difference between the predicted and the actual connectivity  
22 distributions and the corresponding error,  $\varepsilon^2$  (magenta lines), see **Fig. S3** and  
23 **Material and Methods**.

1 **Figure 5. Packing and connectivity analysis of *Drosophila*'s salivary**  
2 **gland and comparison with the V8 model**  
3 **A)** Full projection of a salivary gland (cell contours stained by Cy3-labeled  
4 phalloidin, **Materials and Methods**). **B)** Computer representation of the  
5 segmented salivary gland shown in **A)** (**Material and Methods**). **C)** 3D  
6 rendering of a representative segmented salivary gland: apical surface, light  
7 green; basal surface, dark green. **D)** Density plots of the distribution of  
8 neighbor exchanges between apical and basal surfaces as a function of the  
9 number of neighbors in apical,  $n_a$ , and basal,  $n_b$ , surfaces (as in **Fig. 2B**):  
10 salivary glands (left) and V8 tubes (right) with surface ratio  $s_b = 1.75$ . **E)**  
11 Comparison between results obtained in salivary glands (top) and the  
12 simulations of the V8 model (bottom) in regards of the 3D cellular connectivity  
13 as a function of the surface ratio (see **Fig. 4C**).  
14



**A**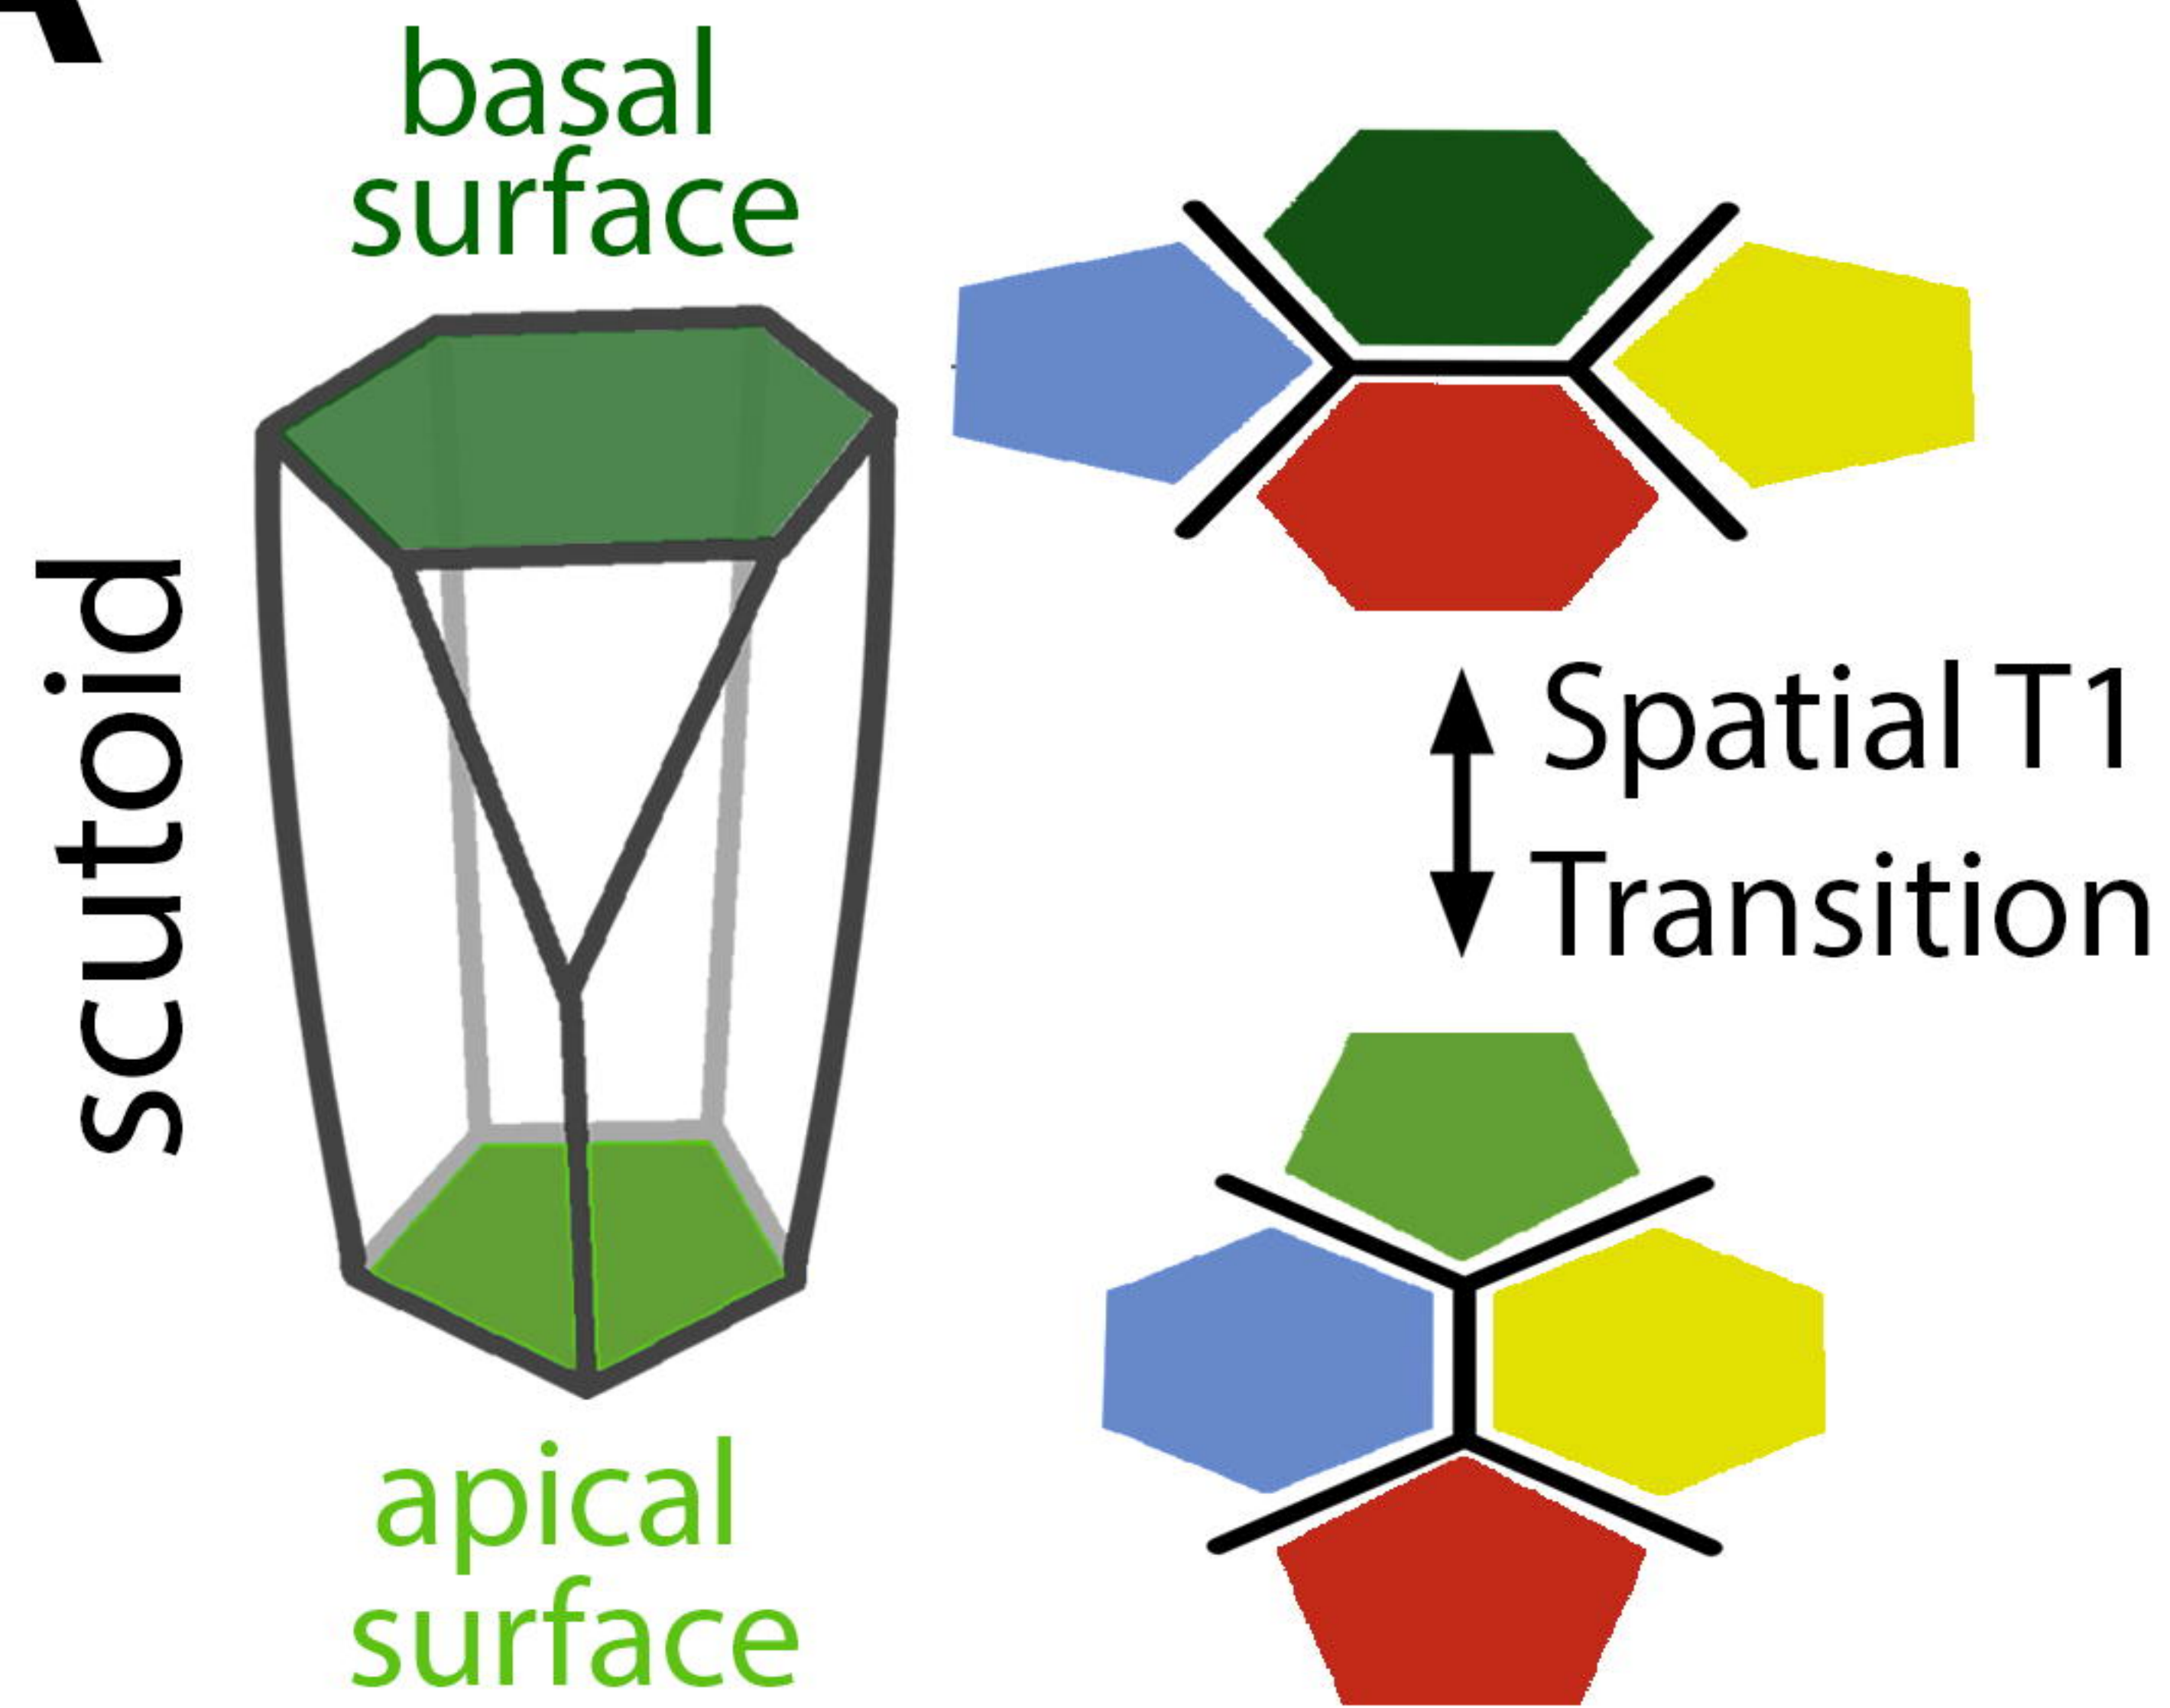**B**

Voronoi tubular model

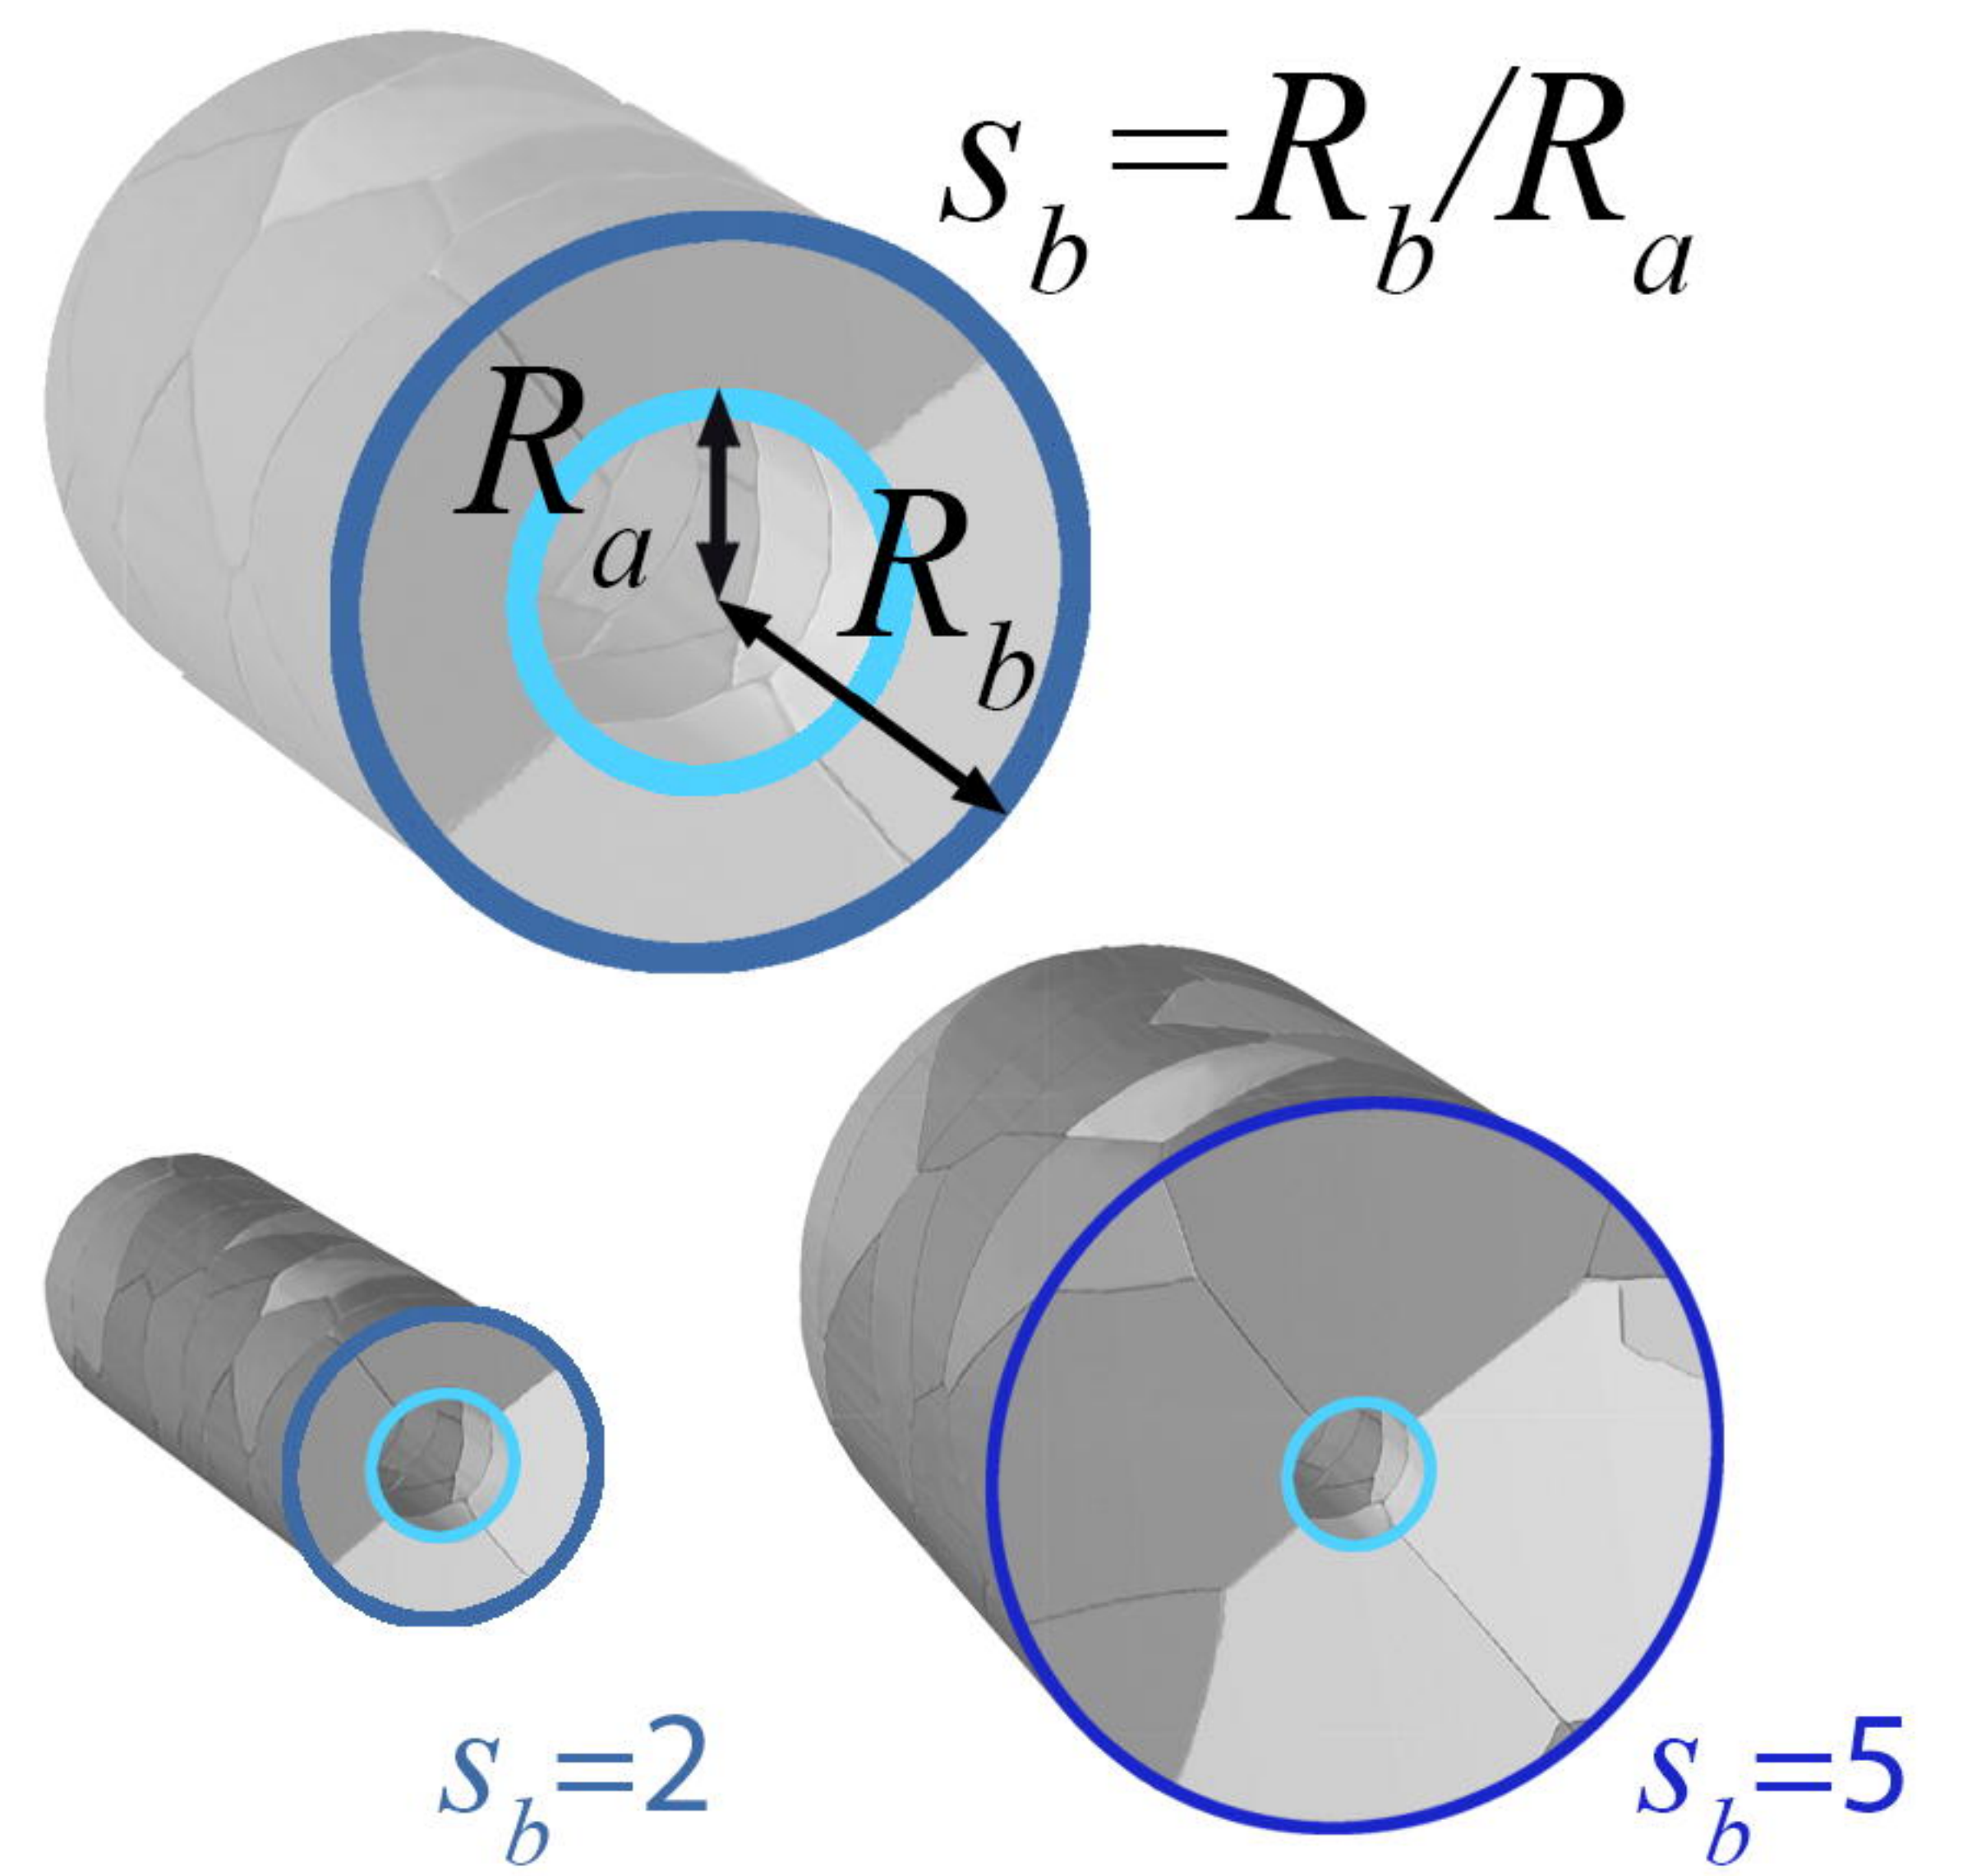**C**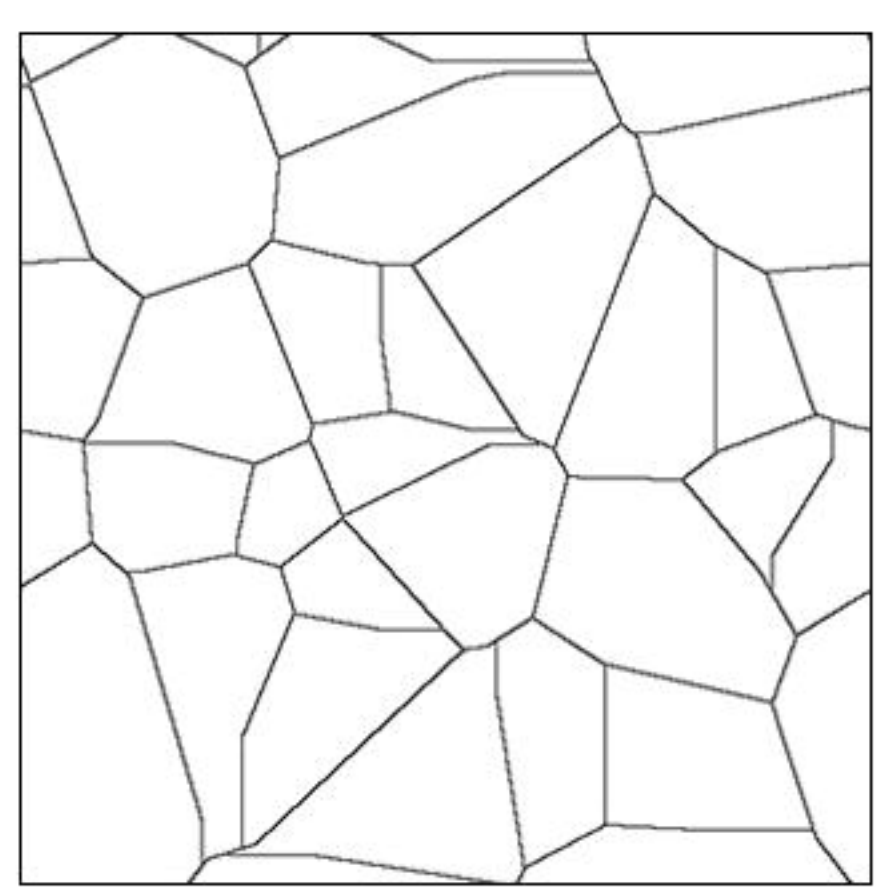

Voronoi 1

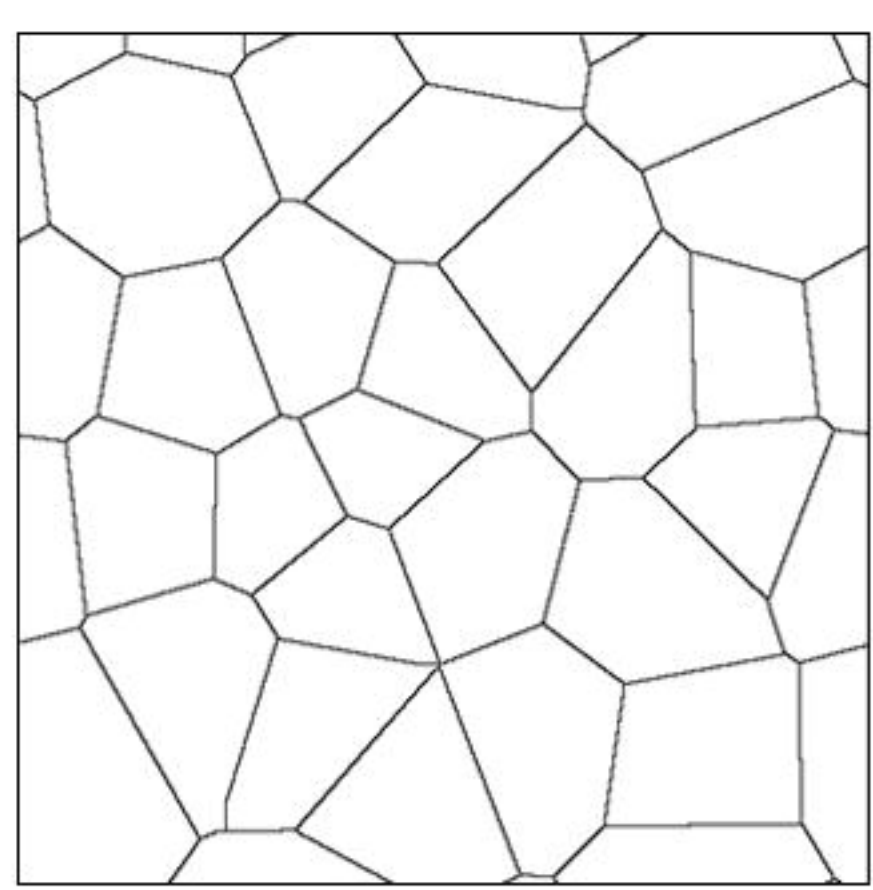

Voronoi 2

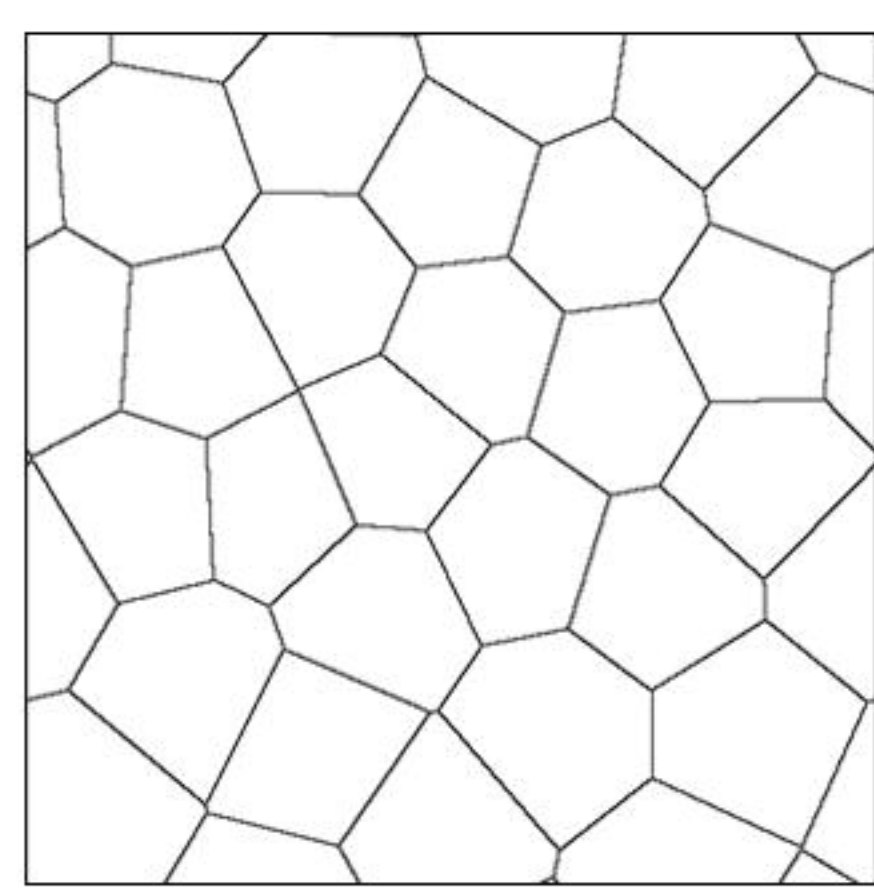

Voronoi 5

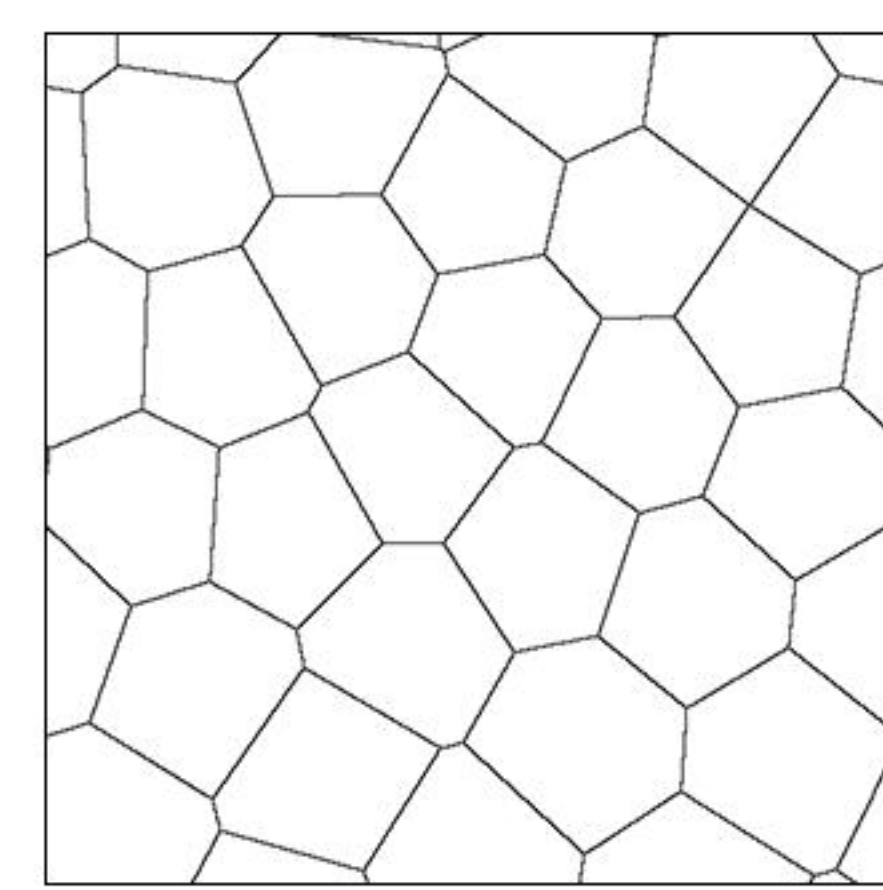

Voronoi 8

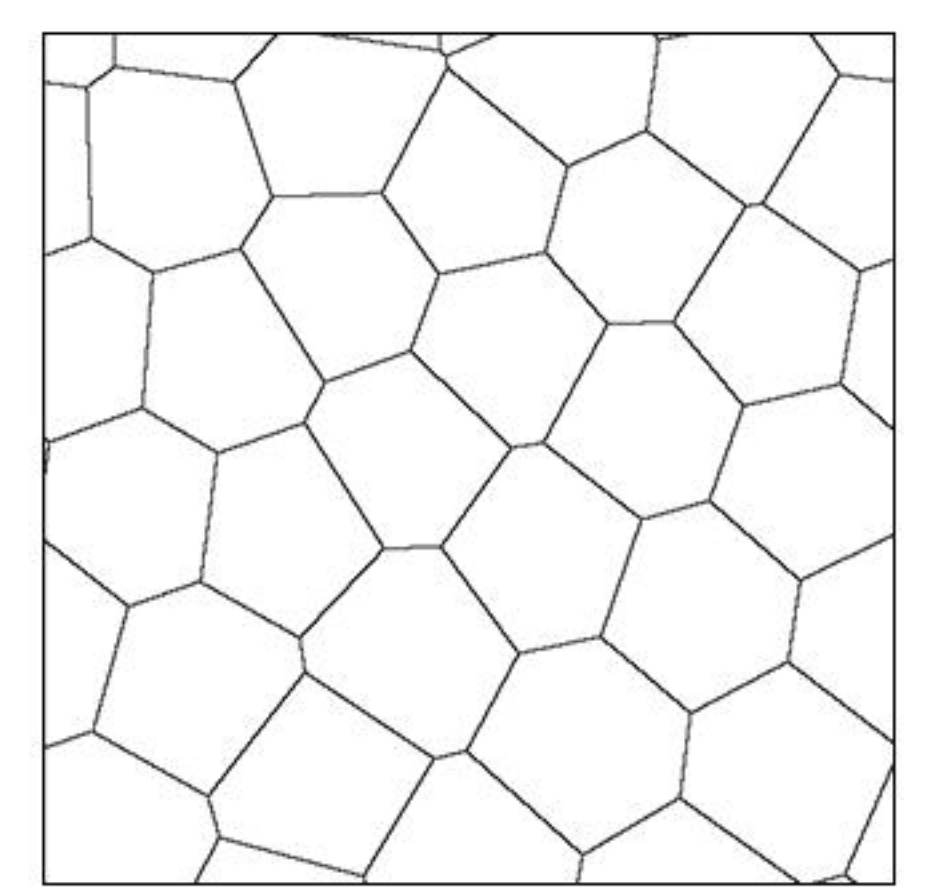

Voronoi 10

**D**

average number of apico-basal intercalations per cell

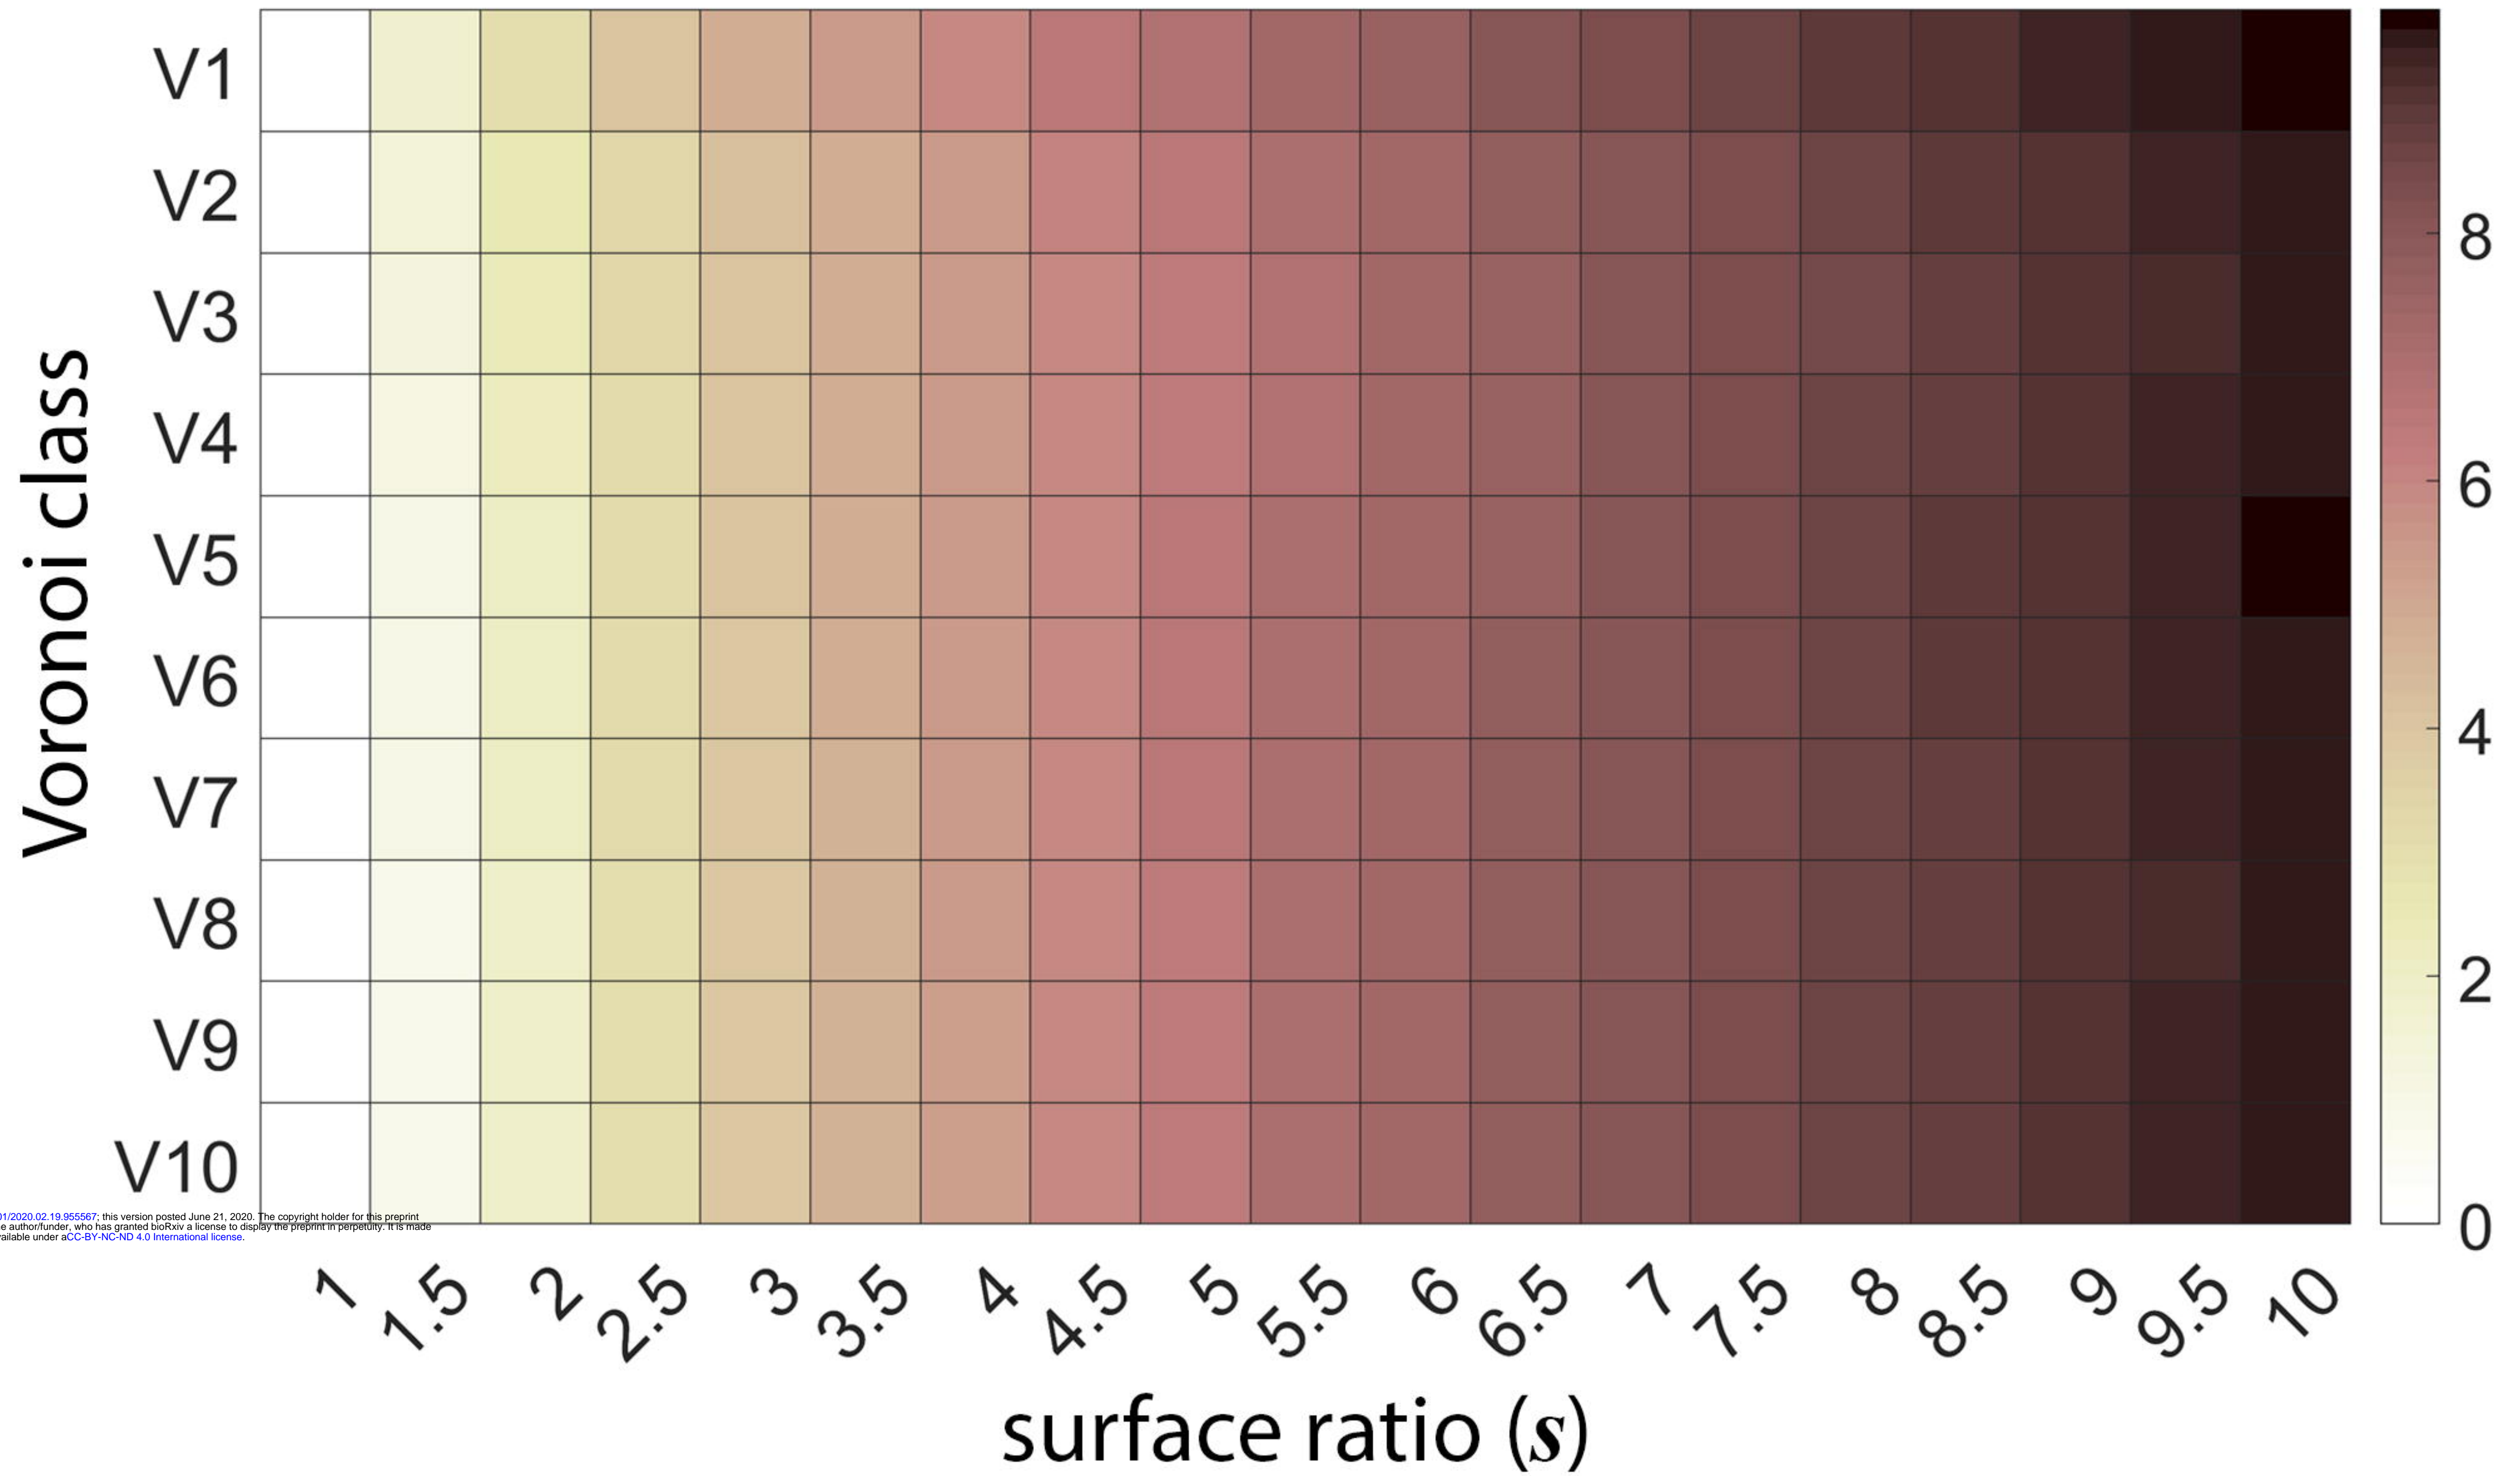



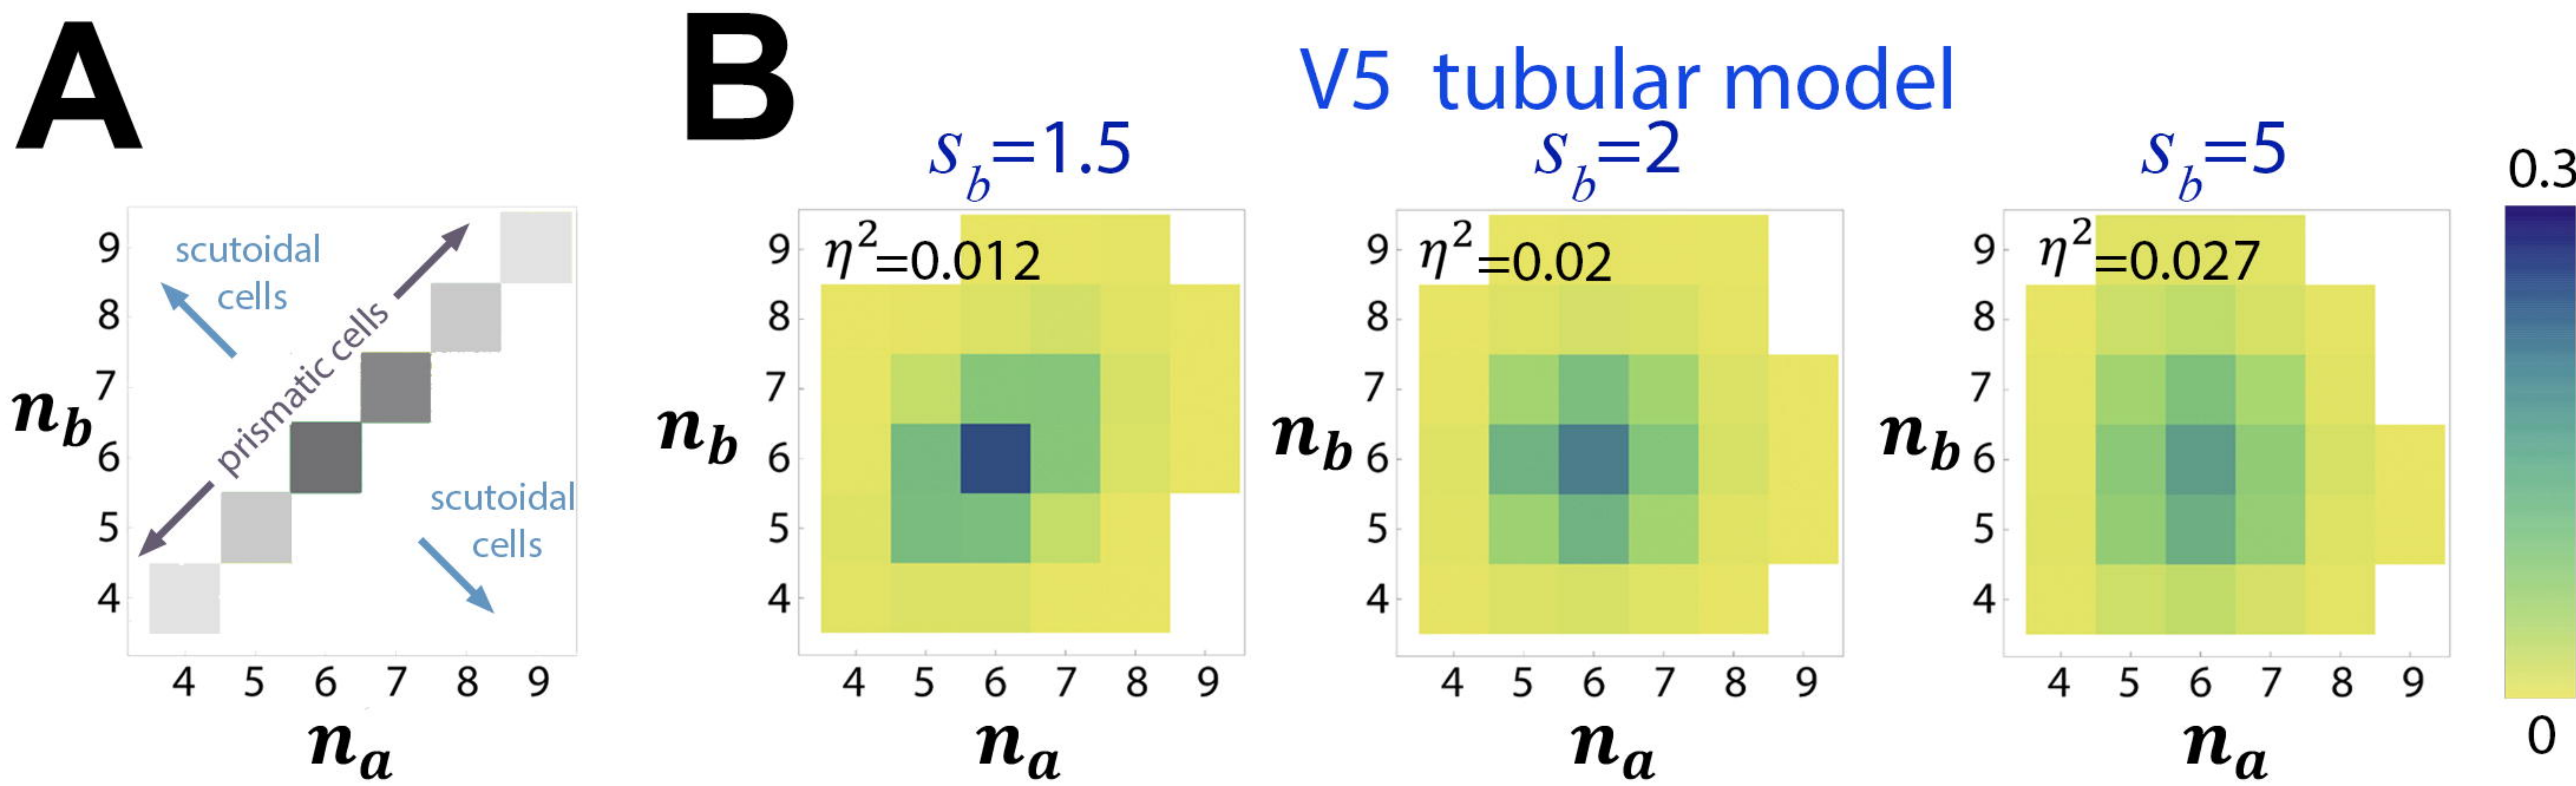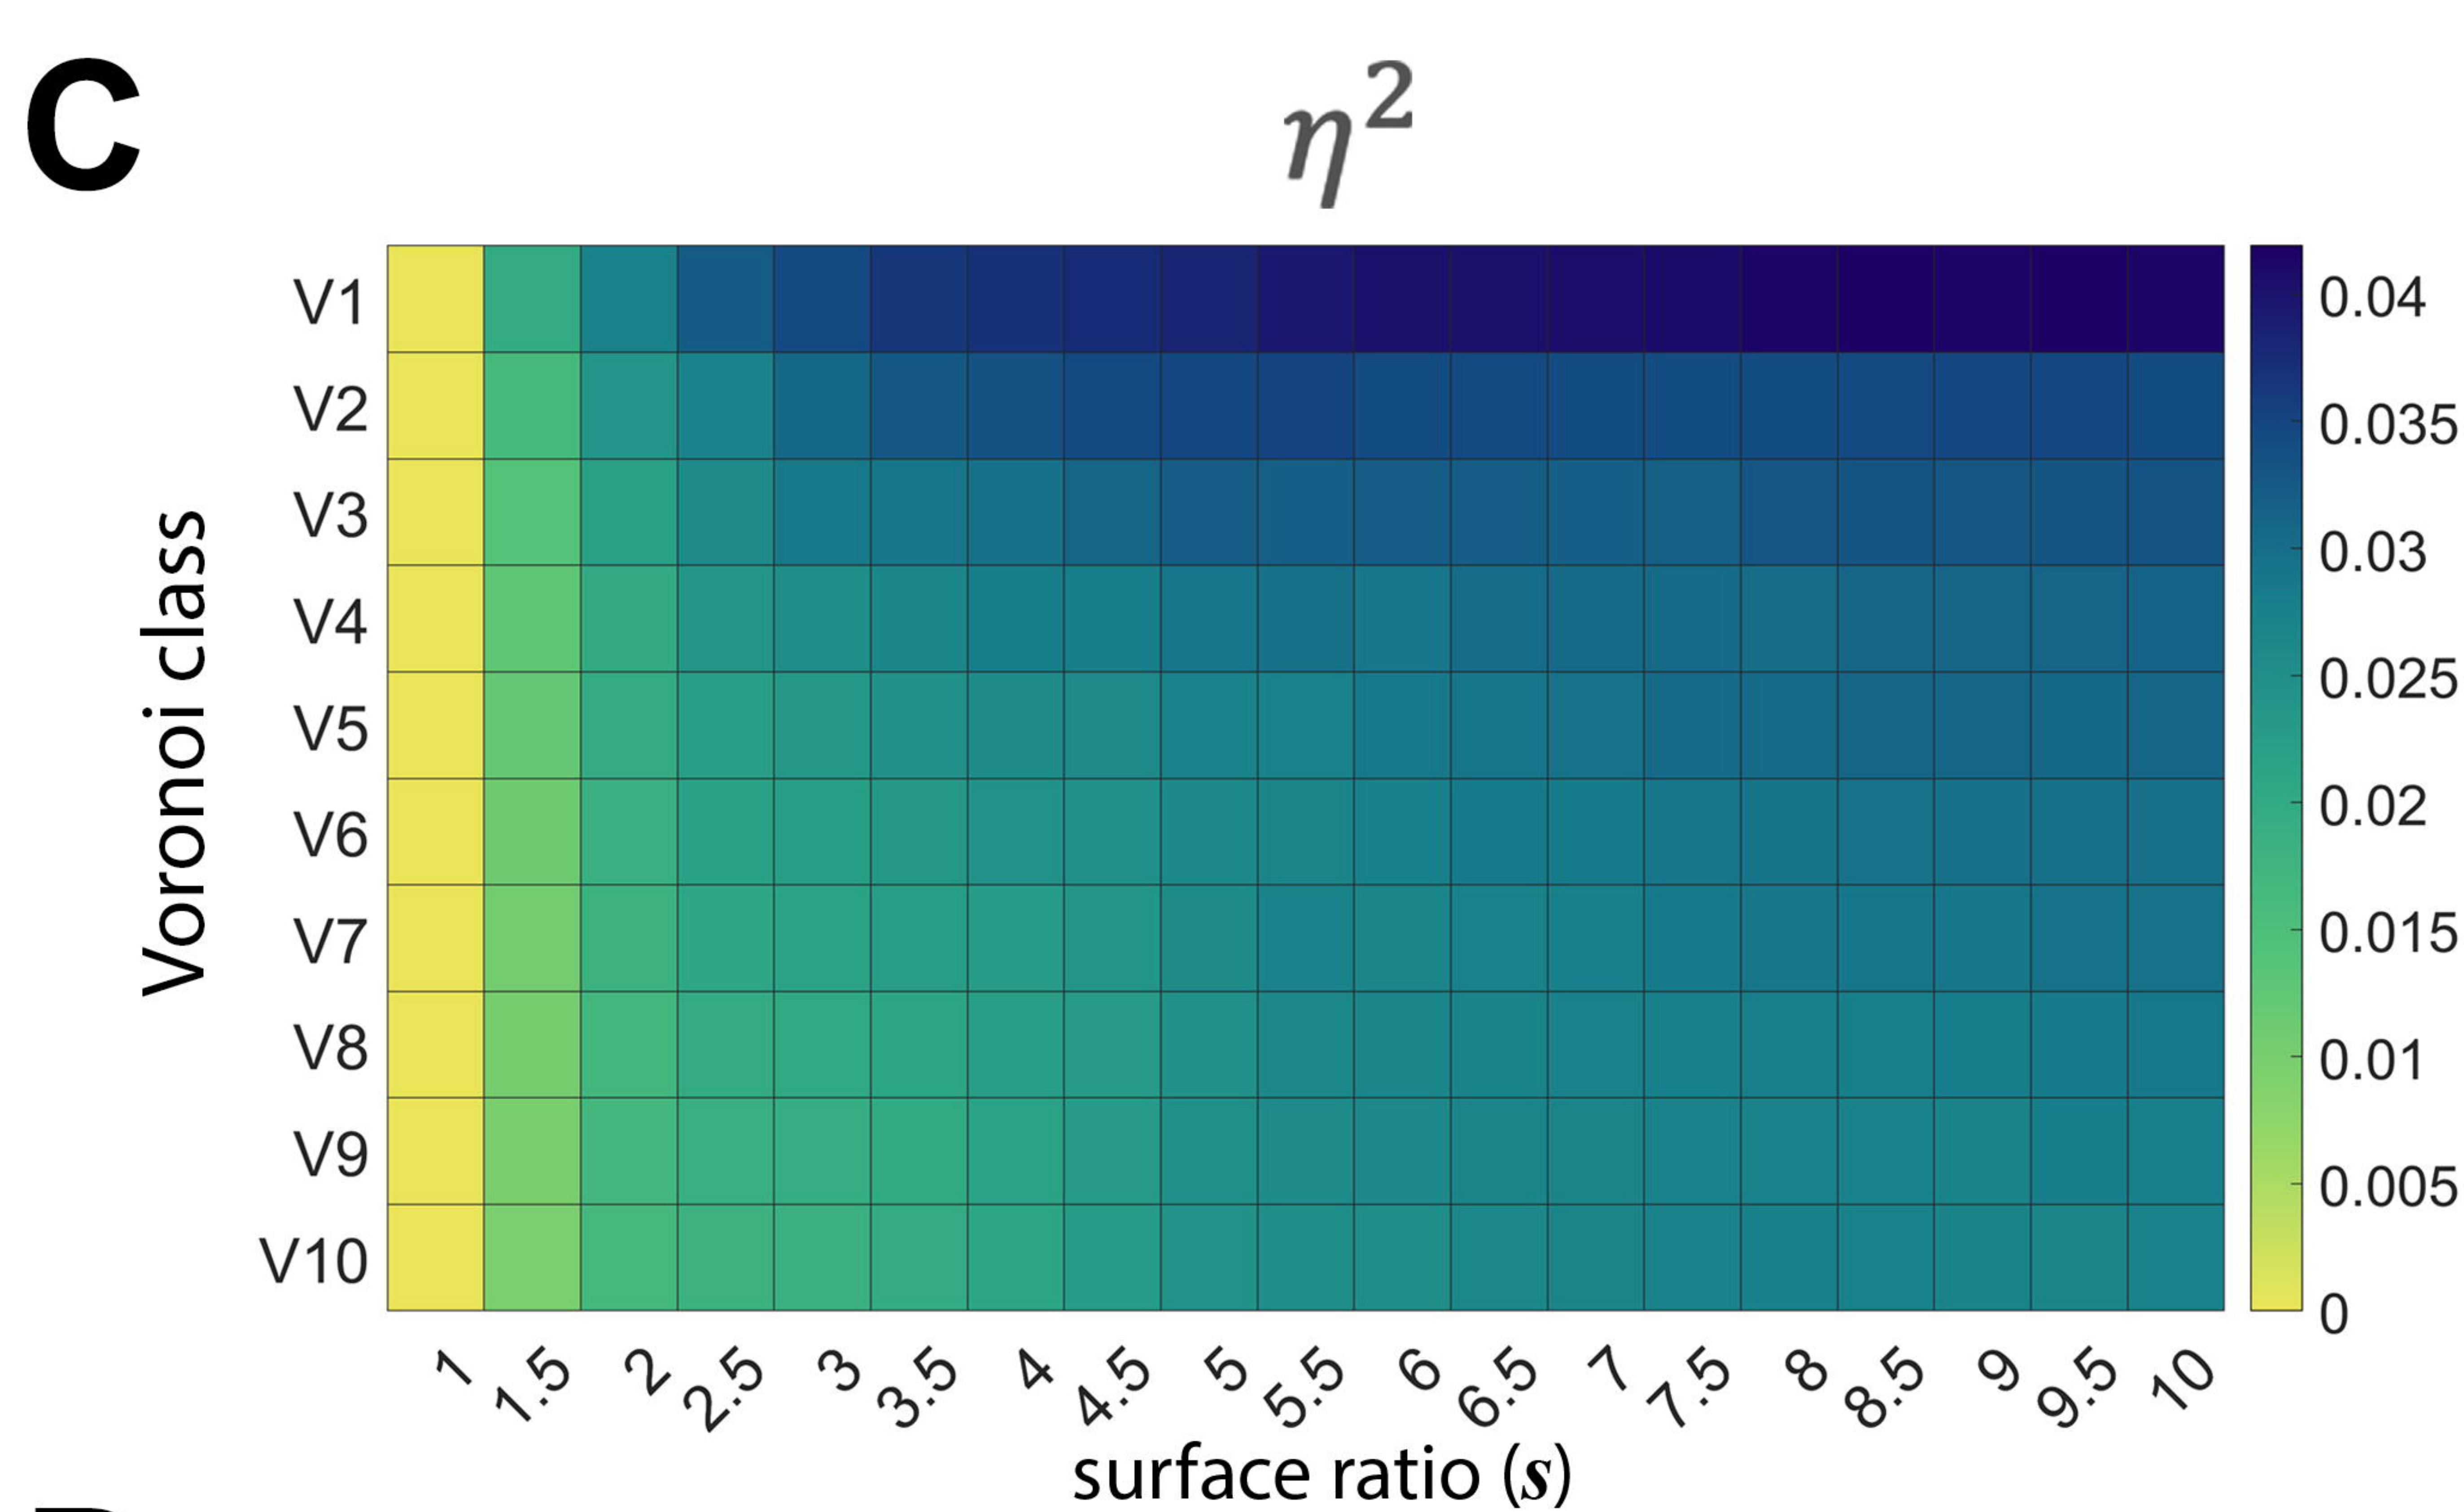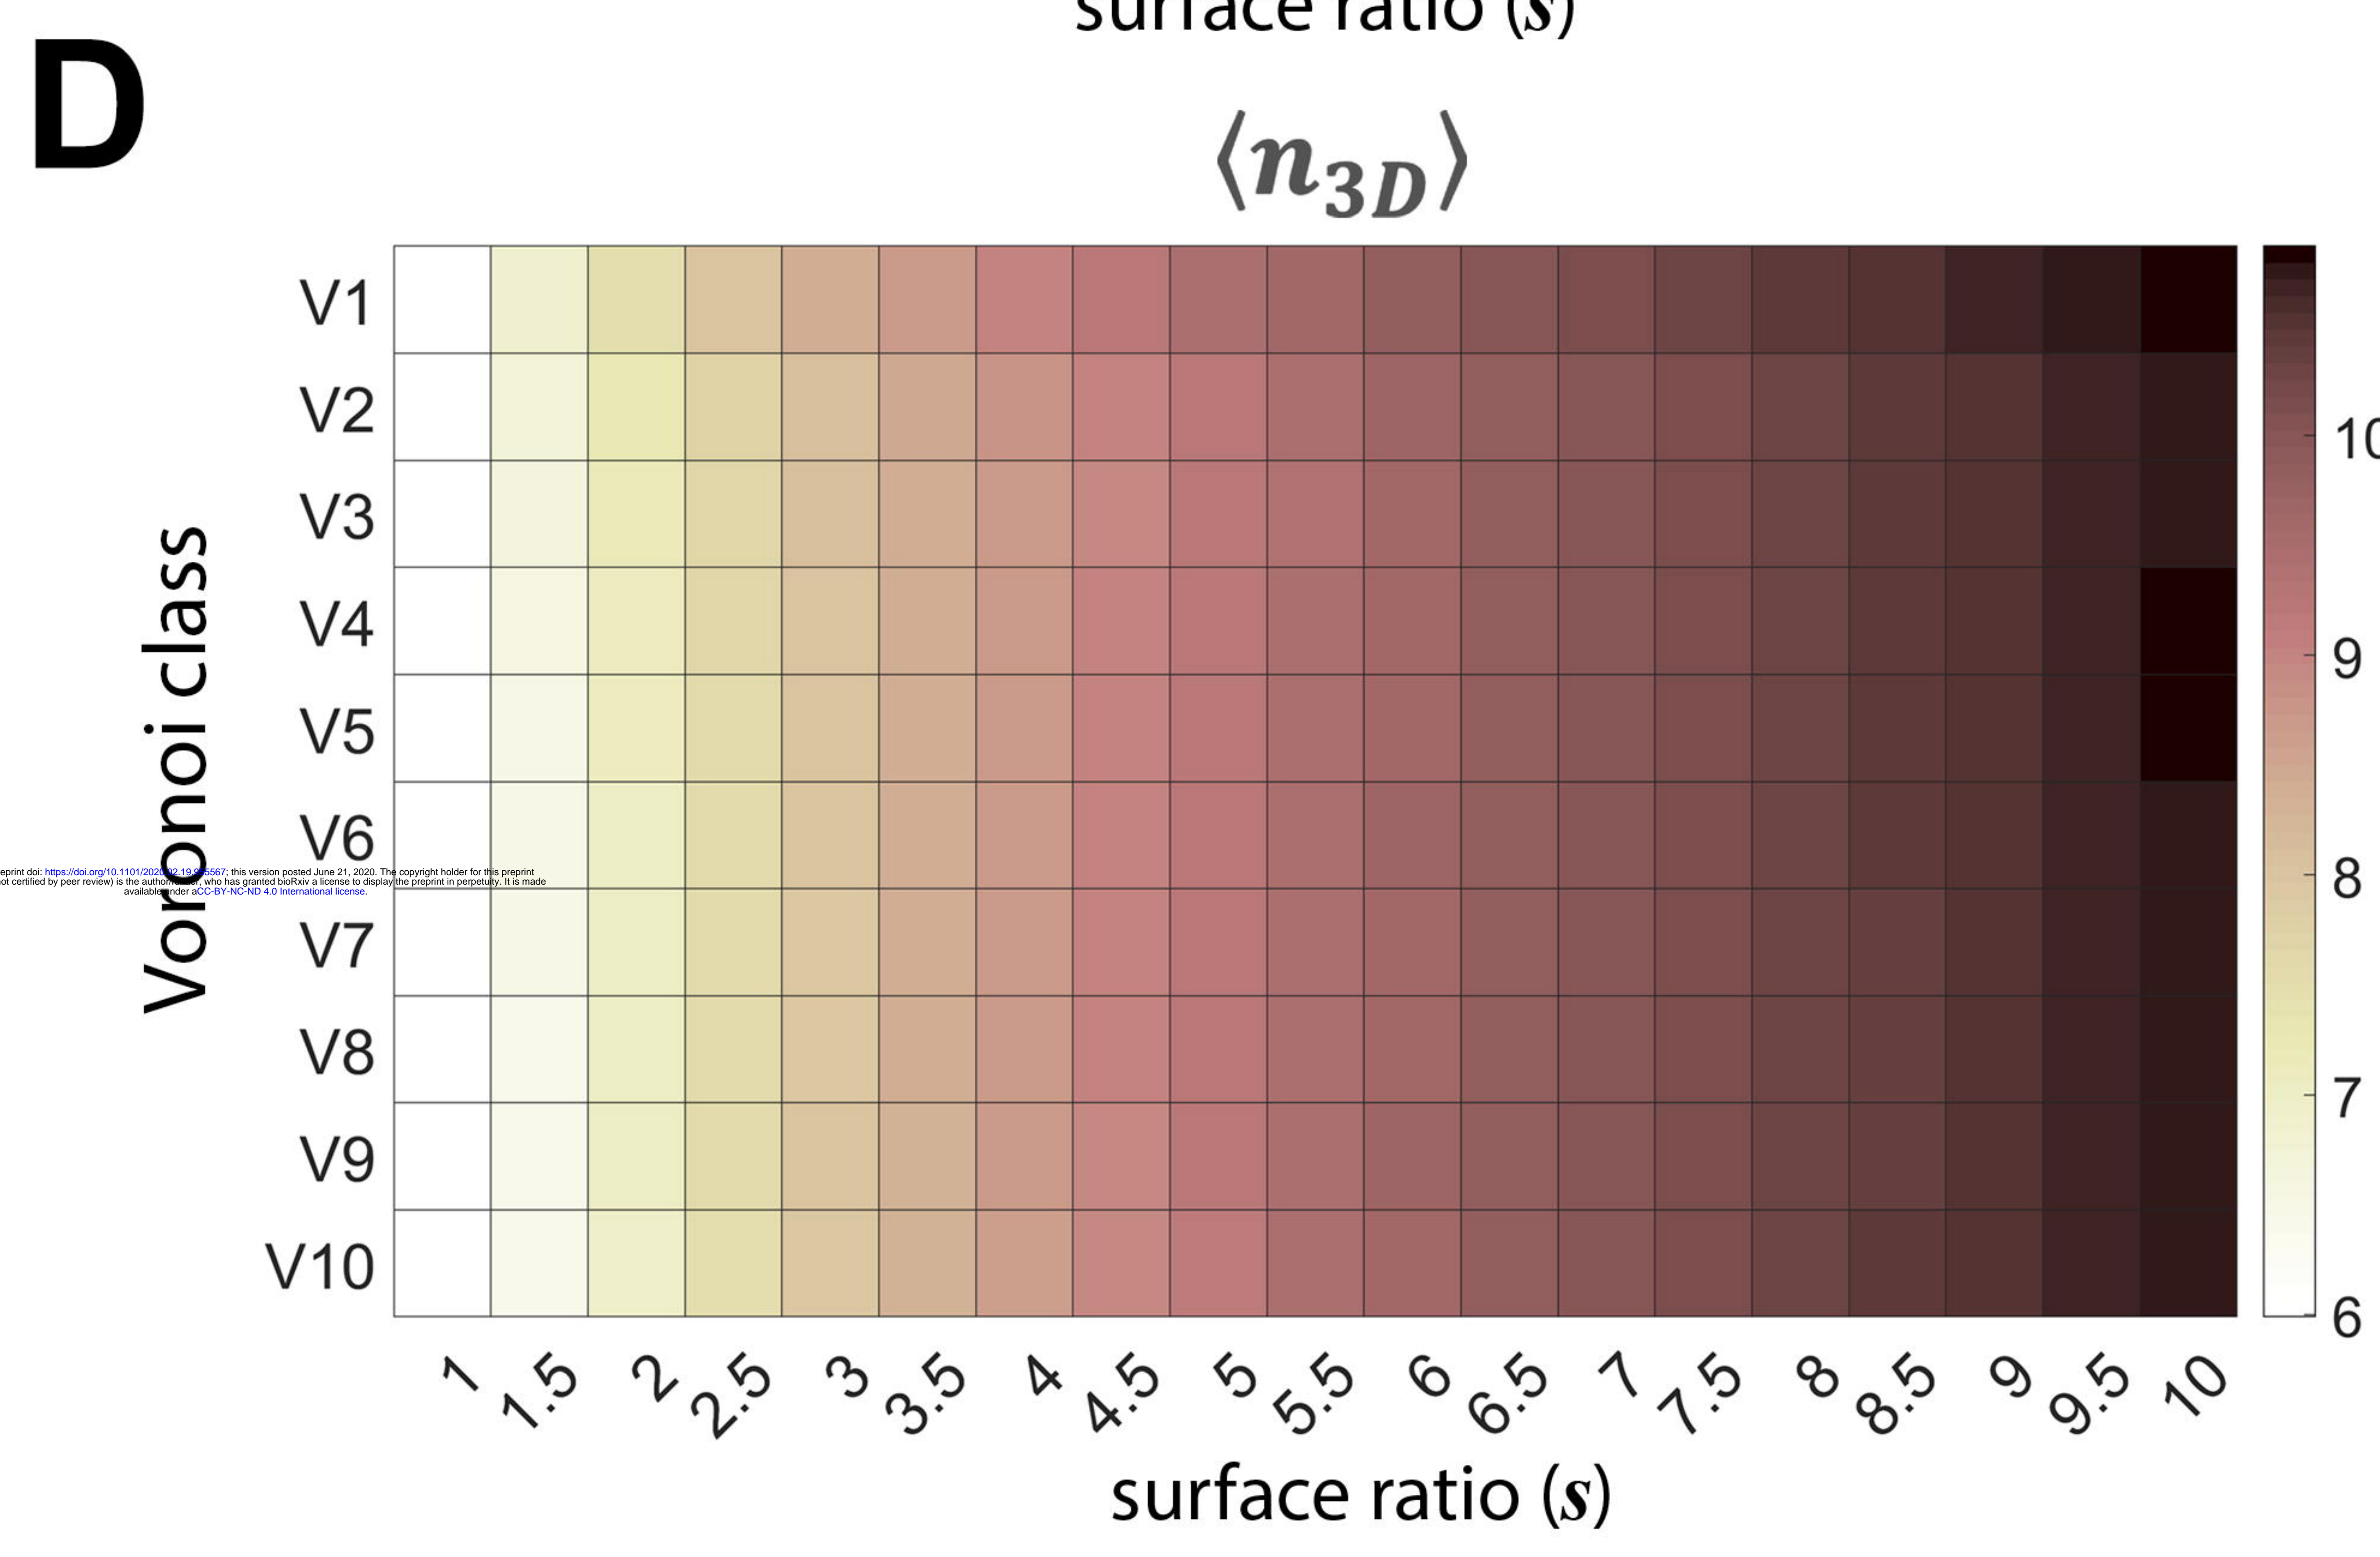



A

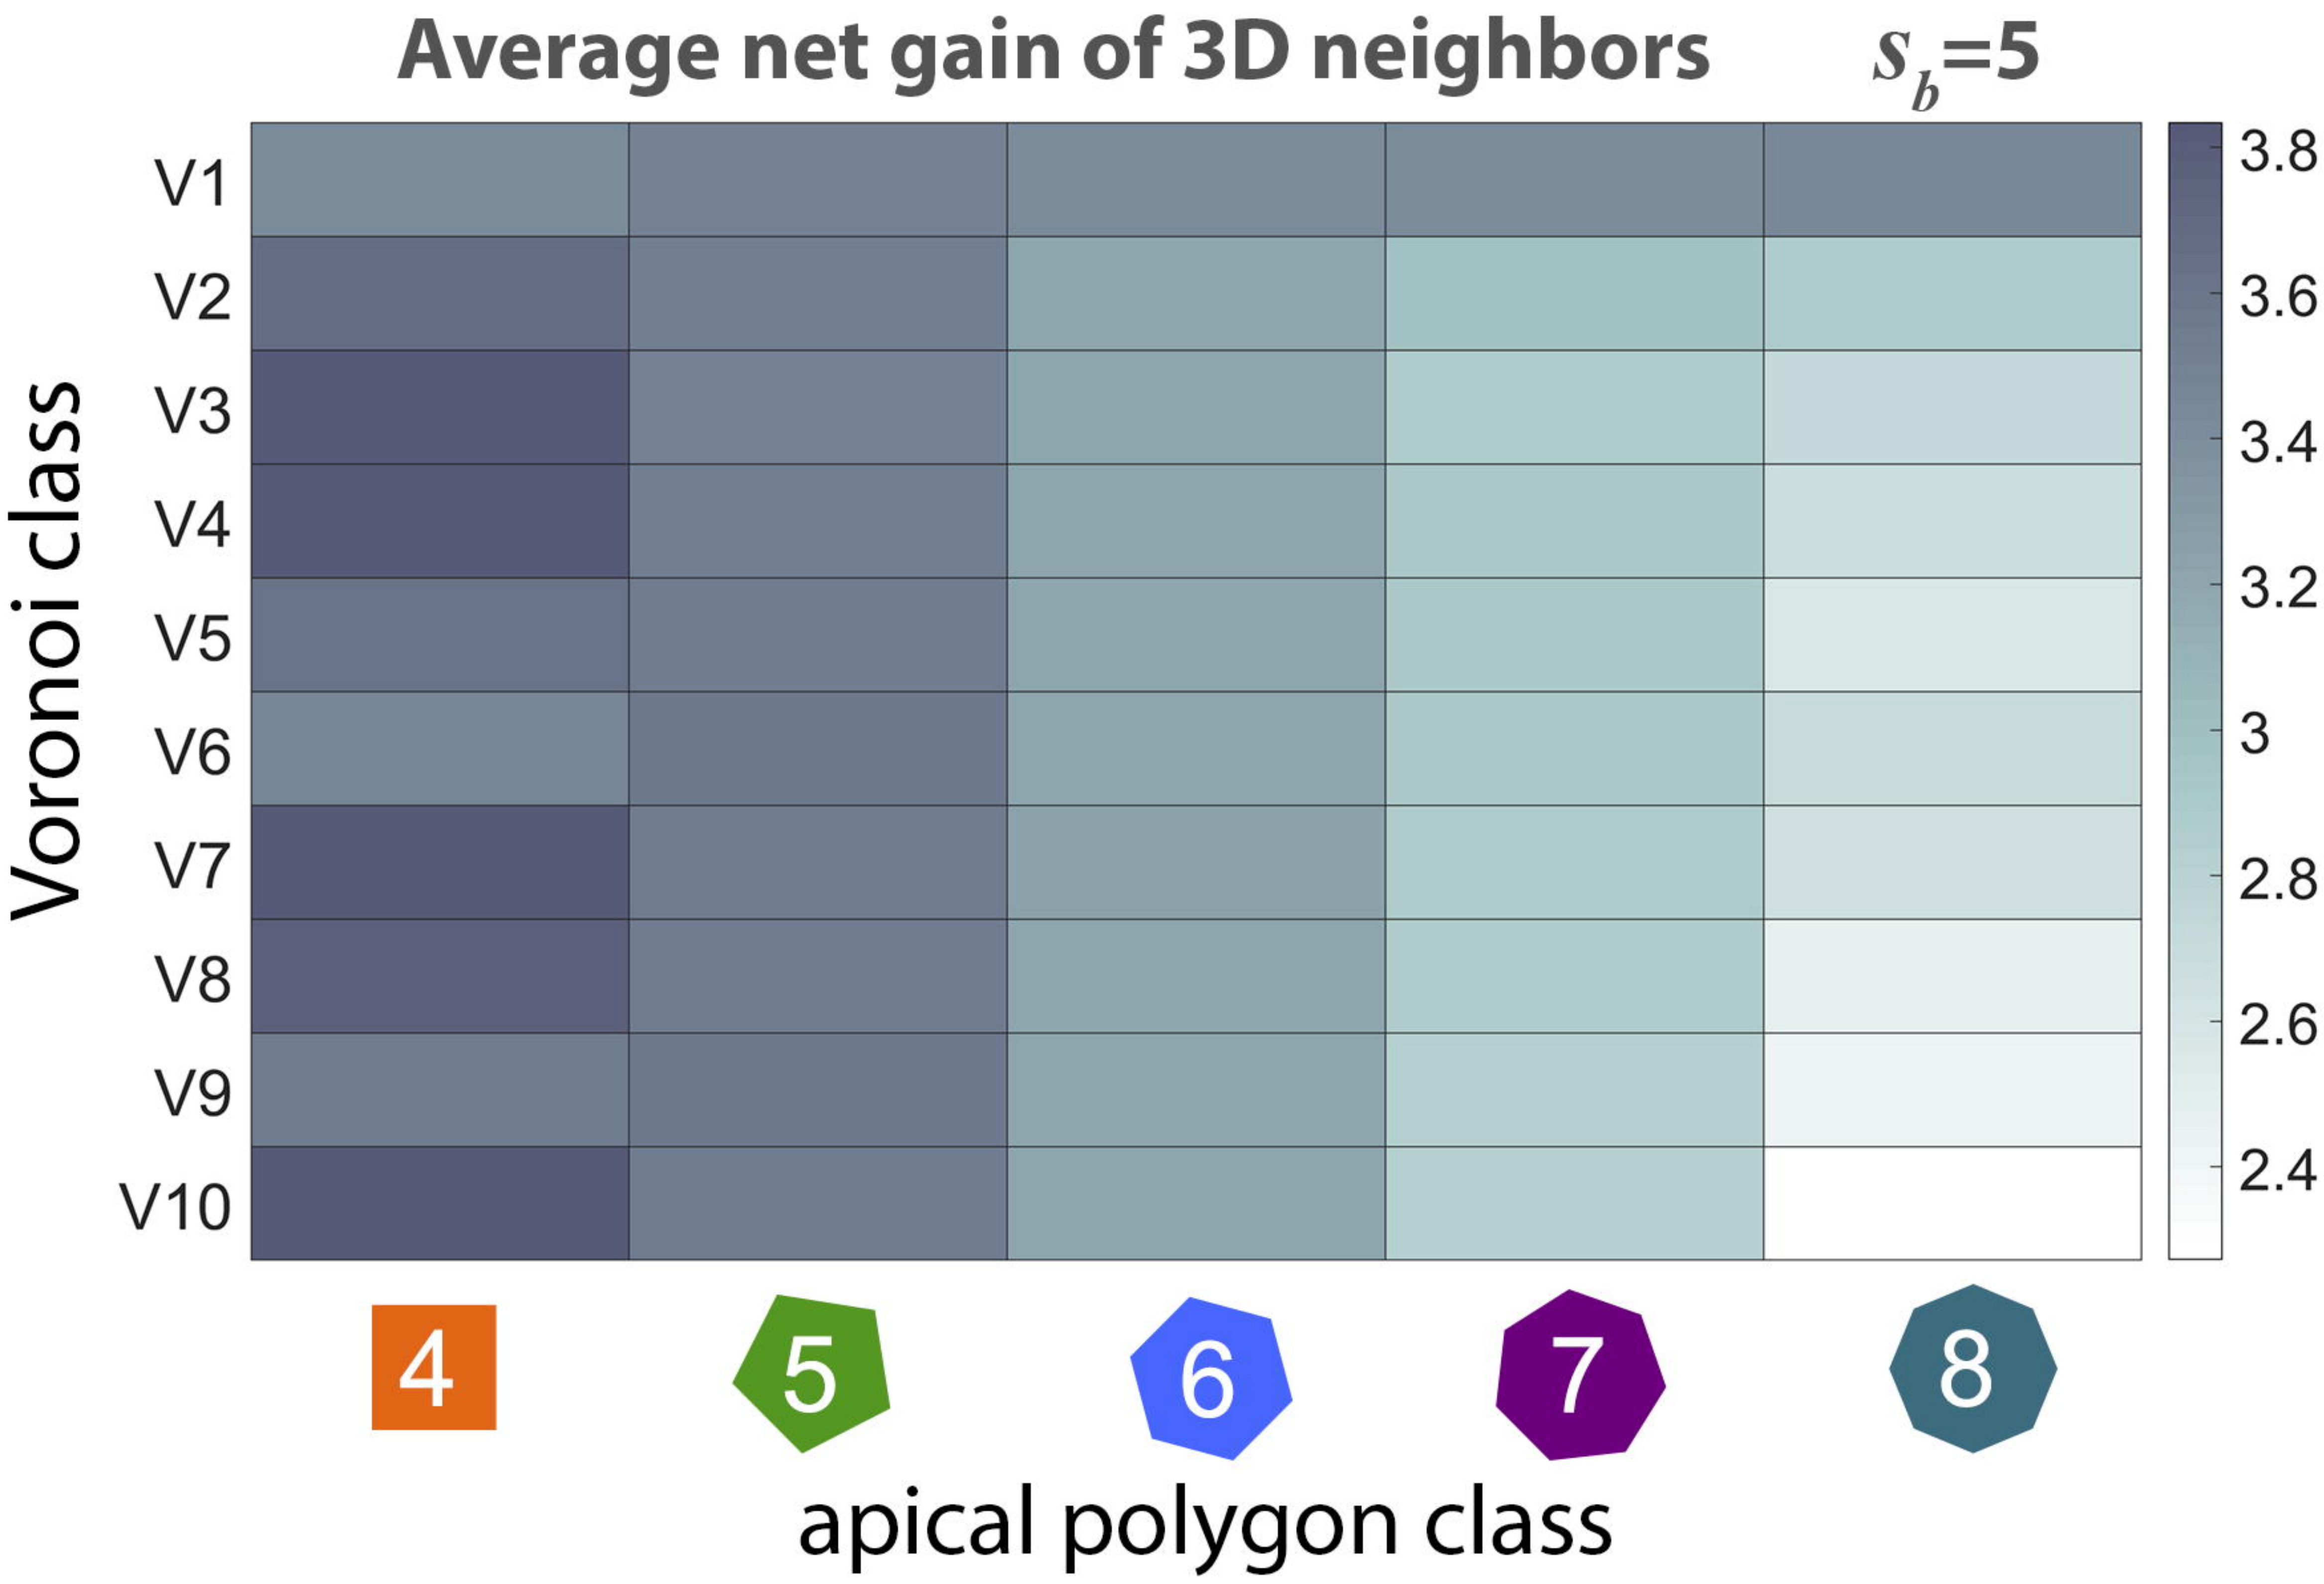

B

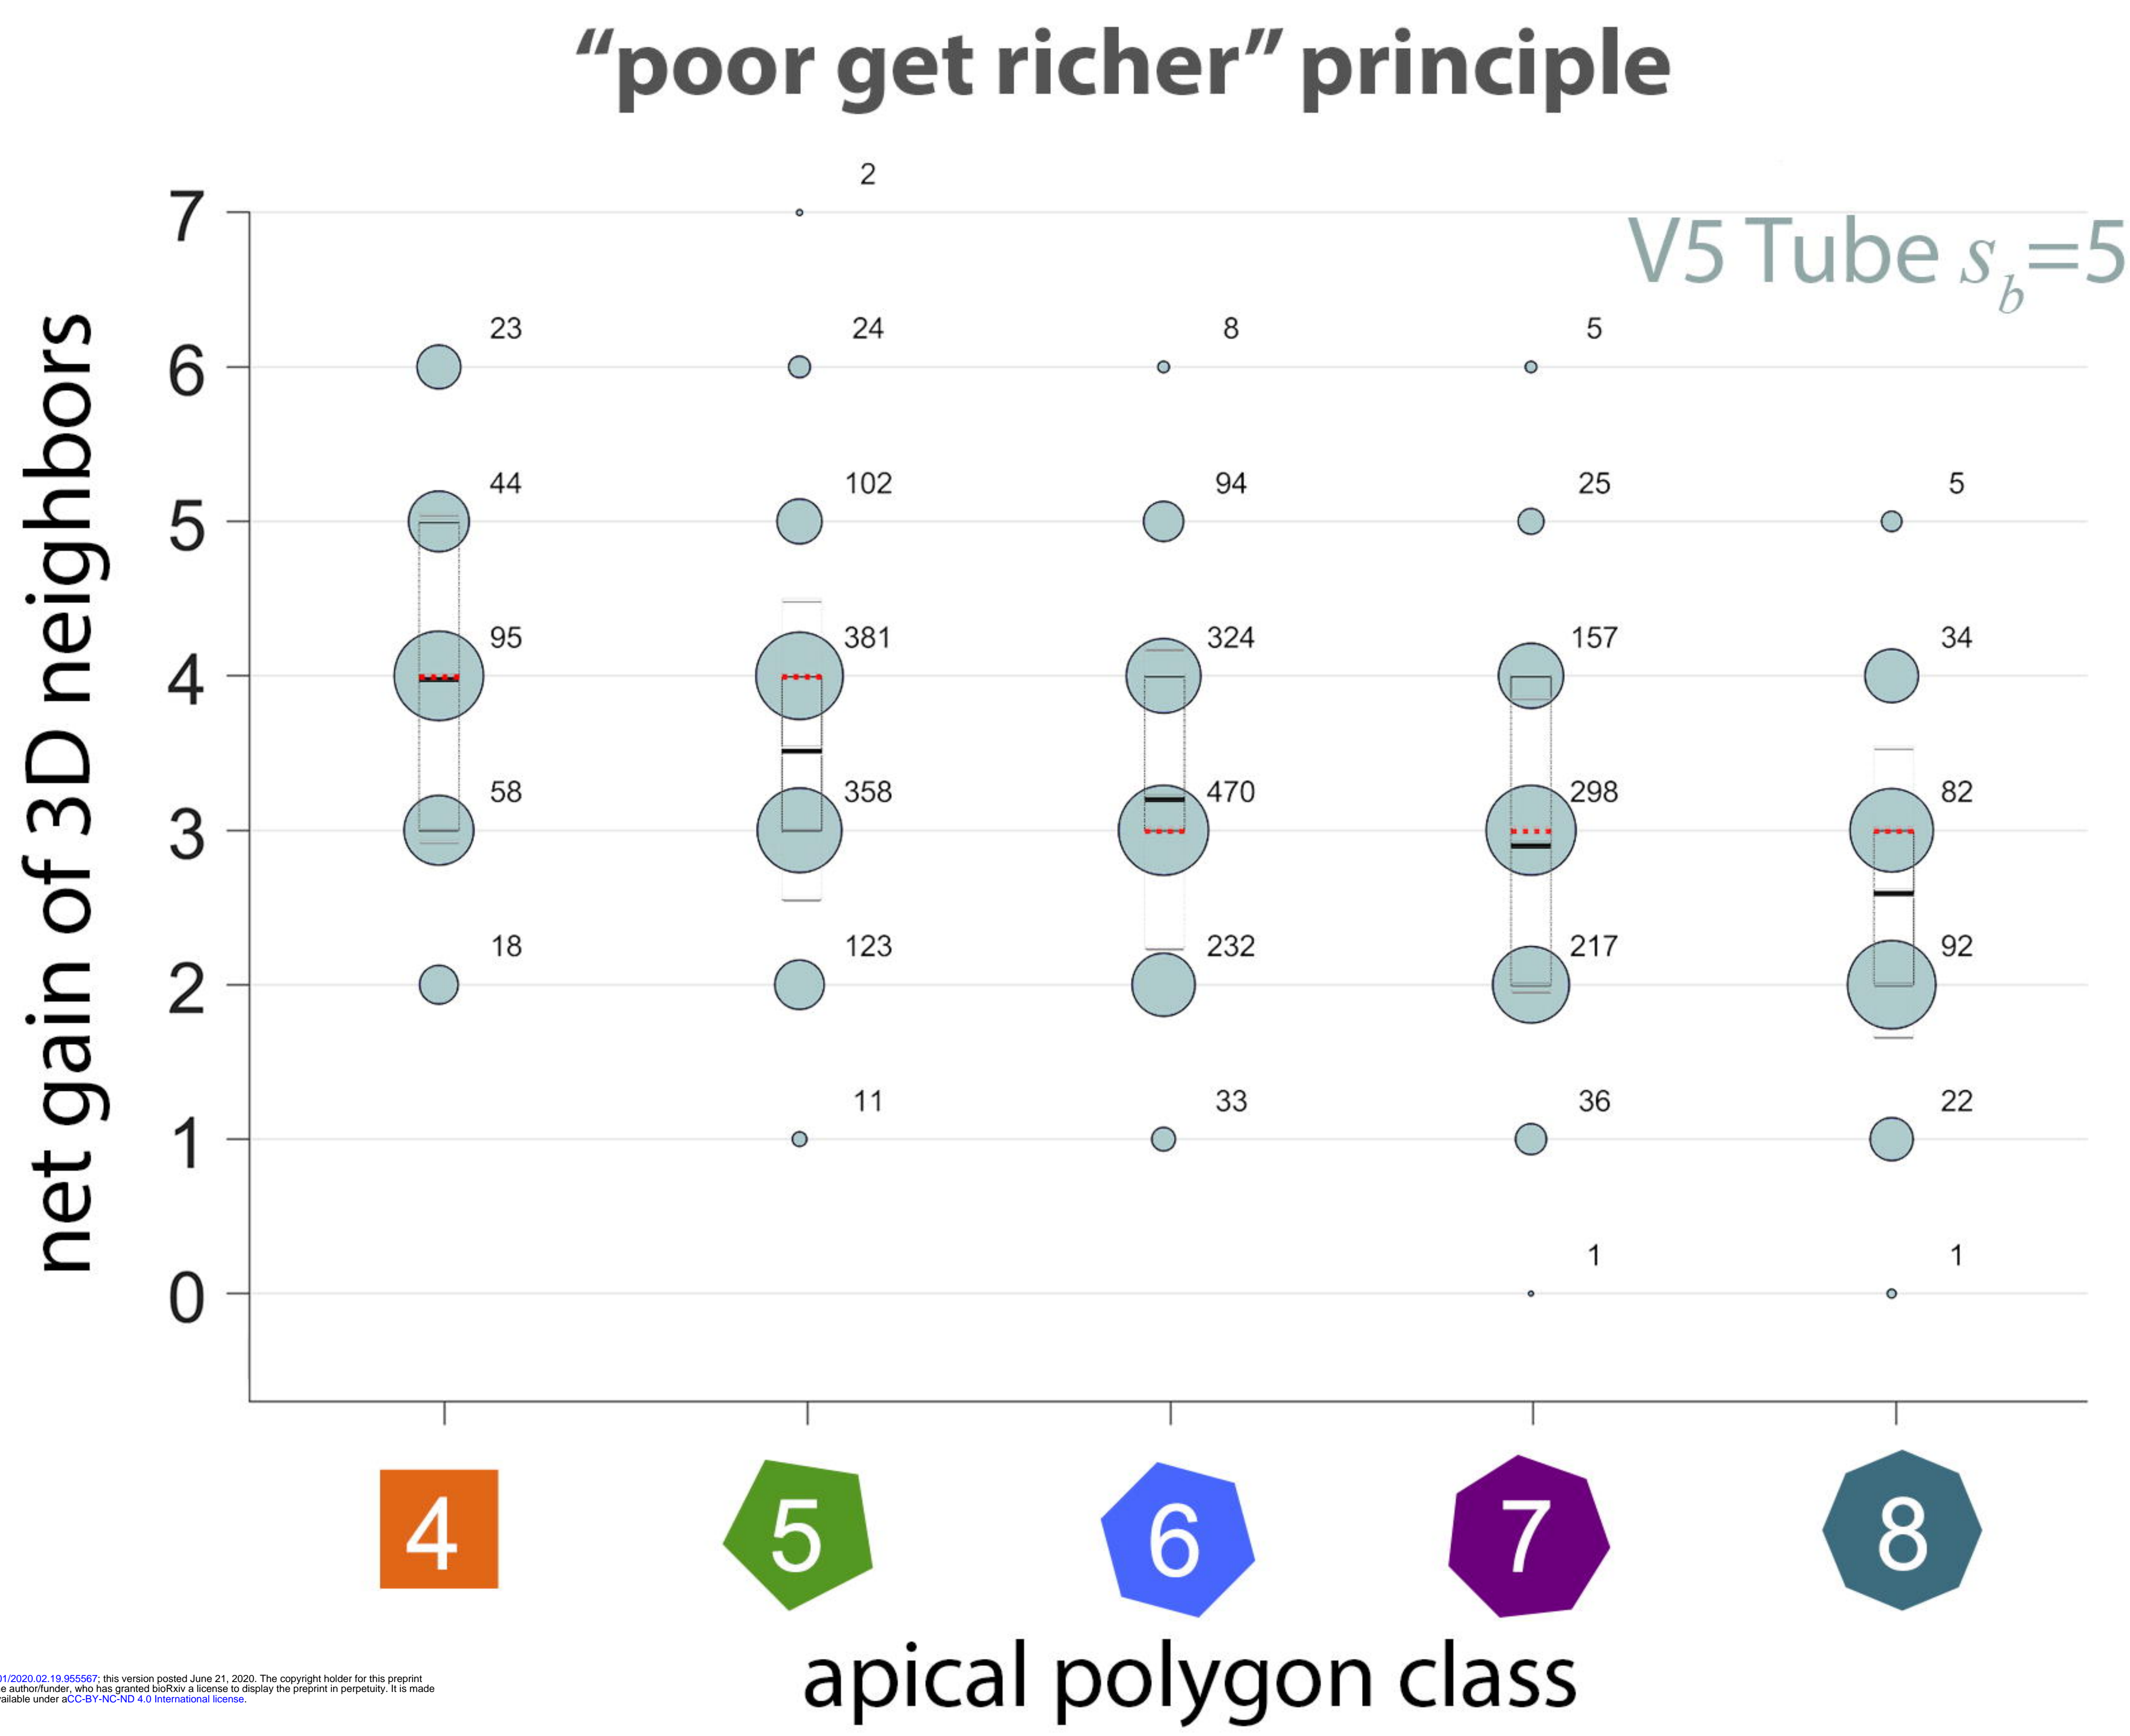



**A**

Voronoi  
Delaunay

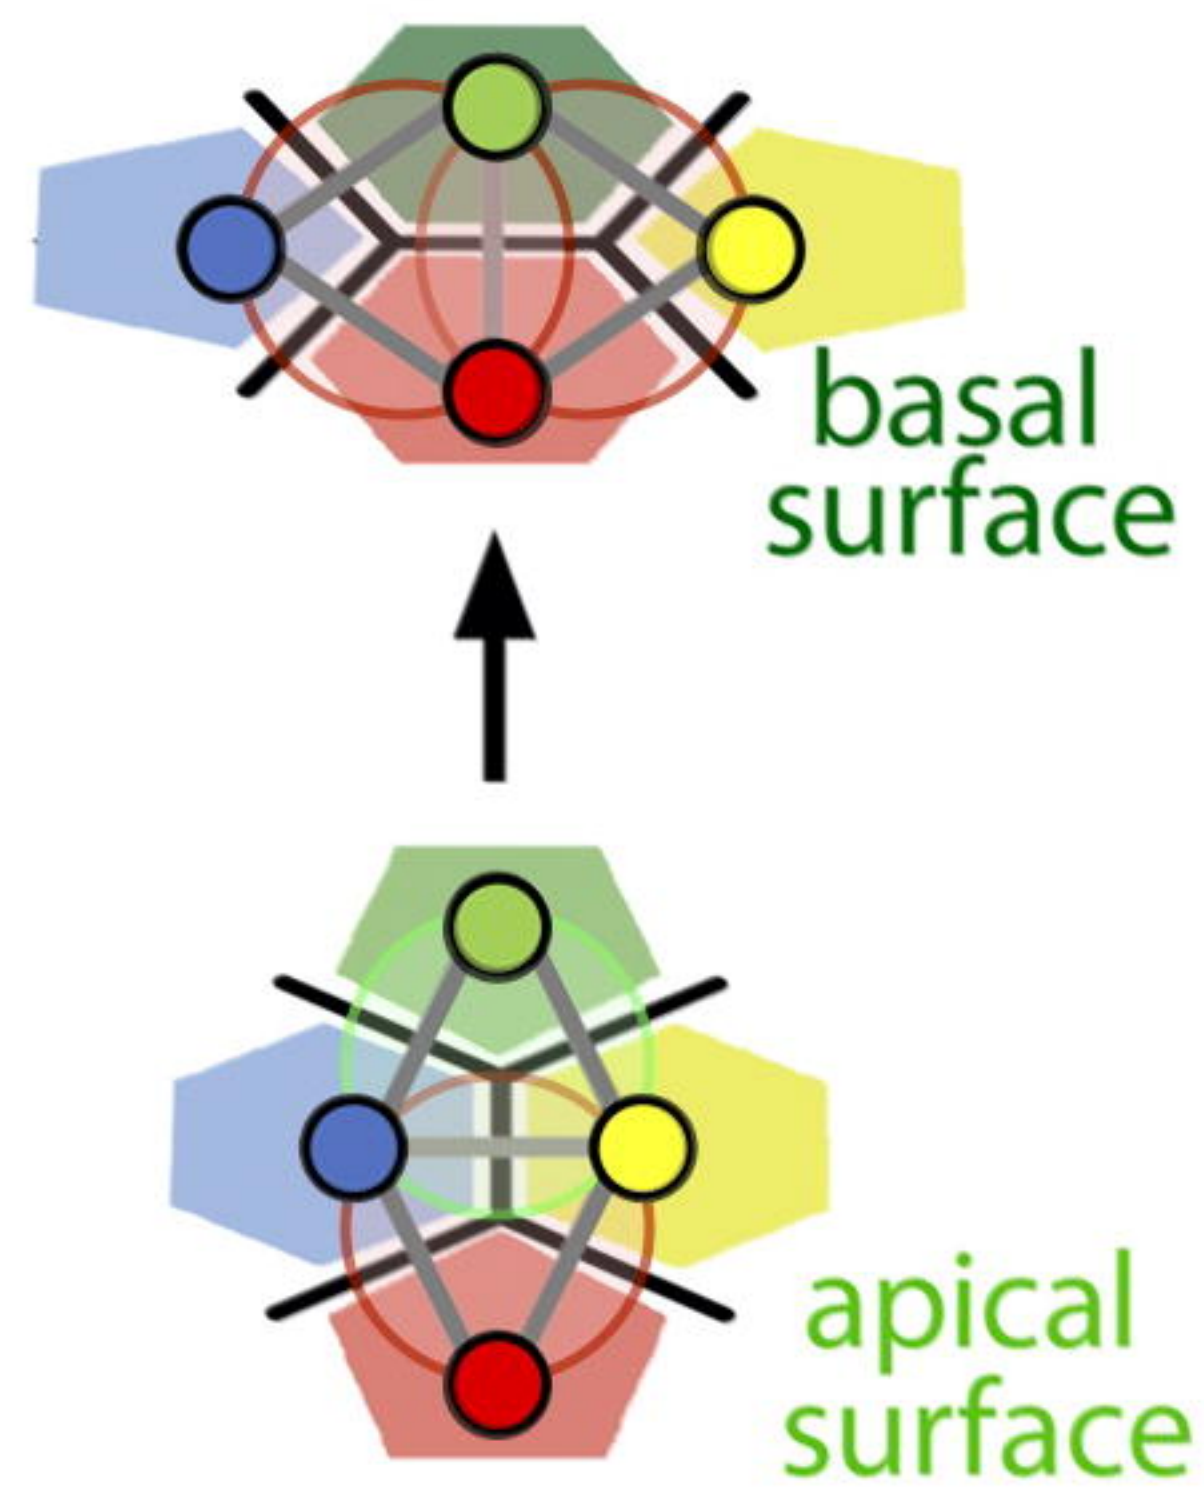

**B**

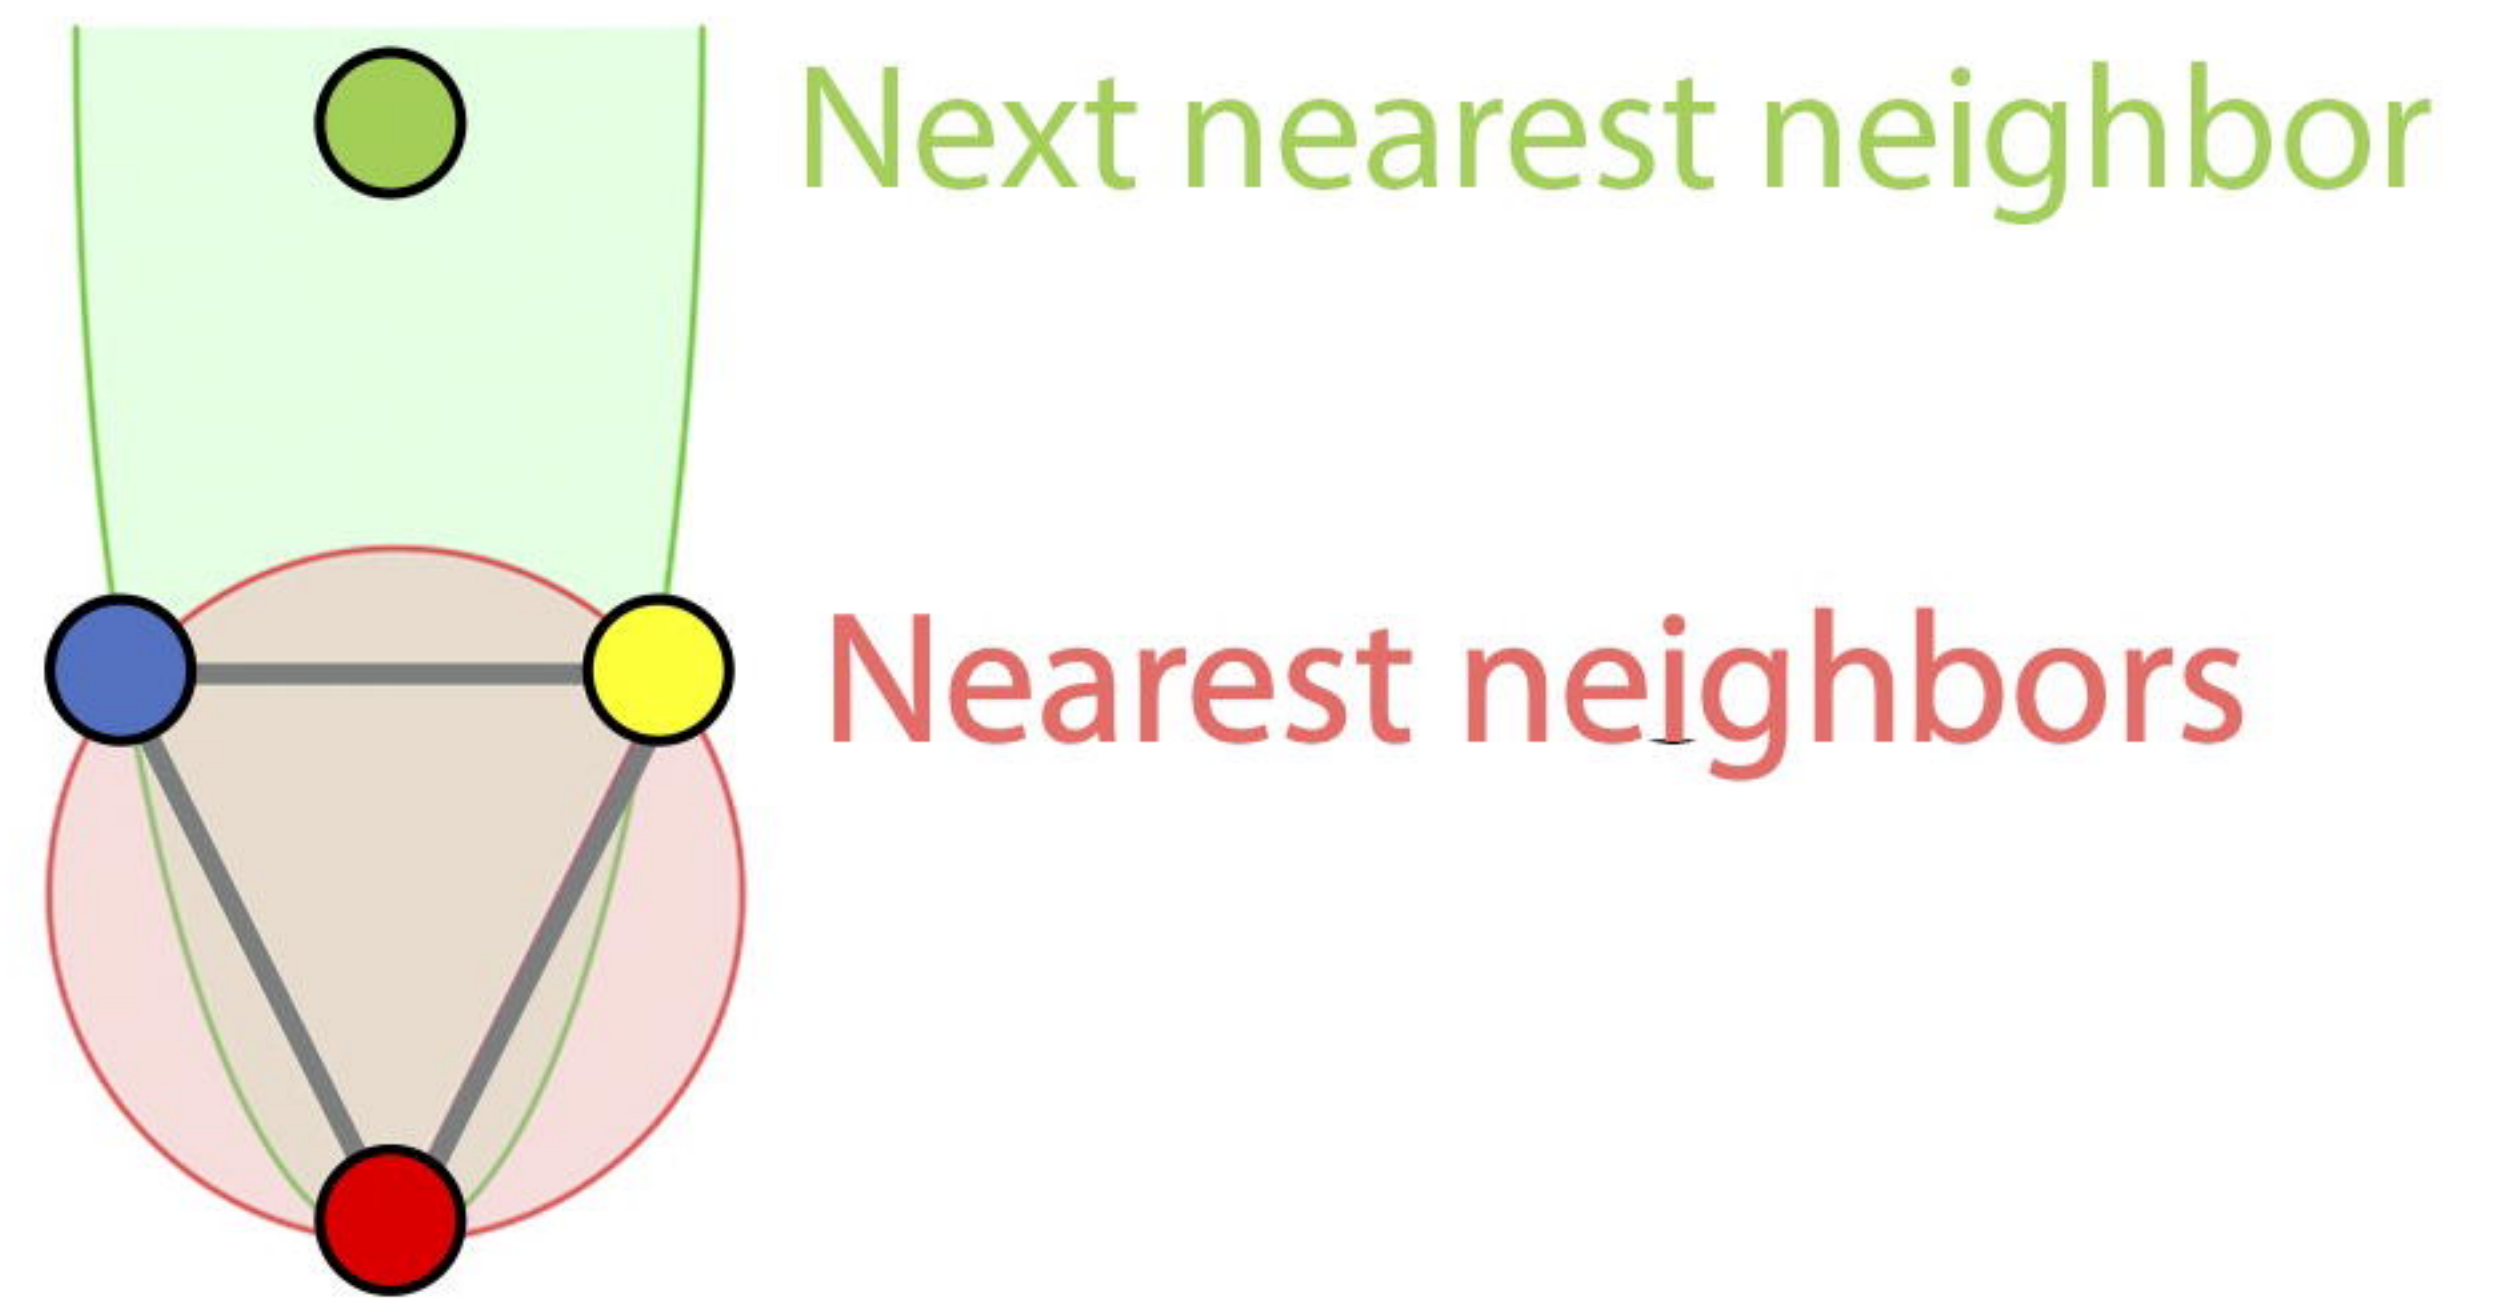

**C**

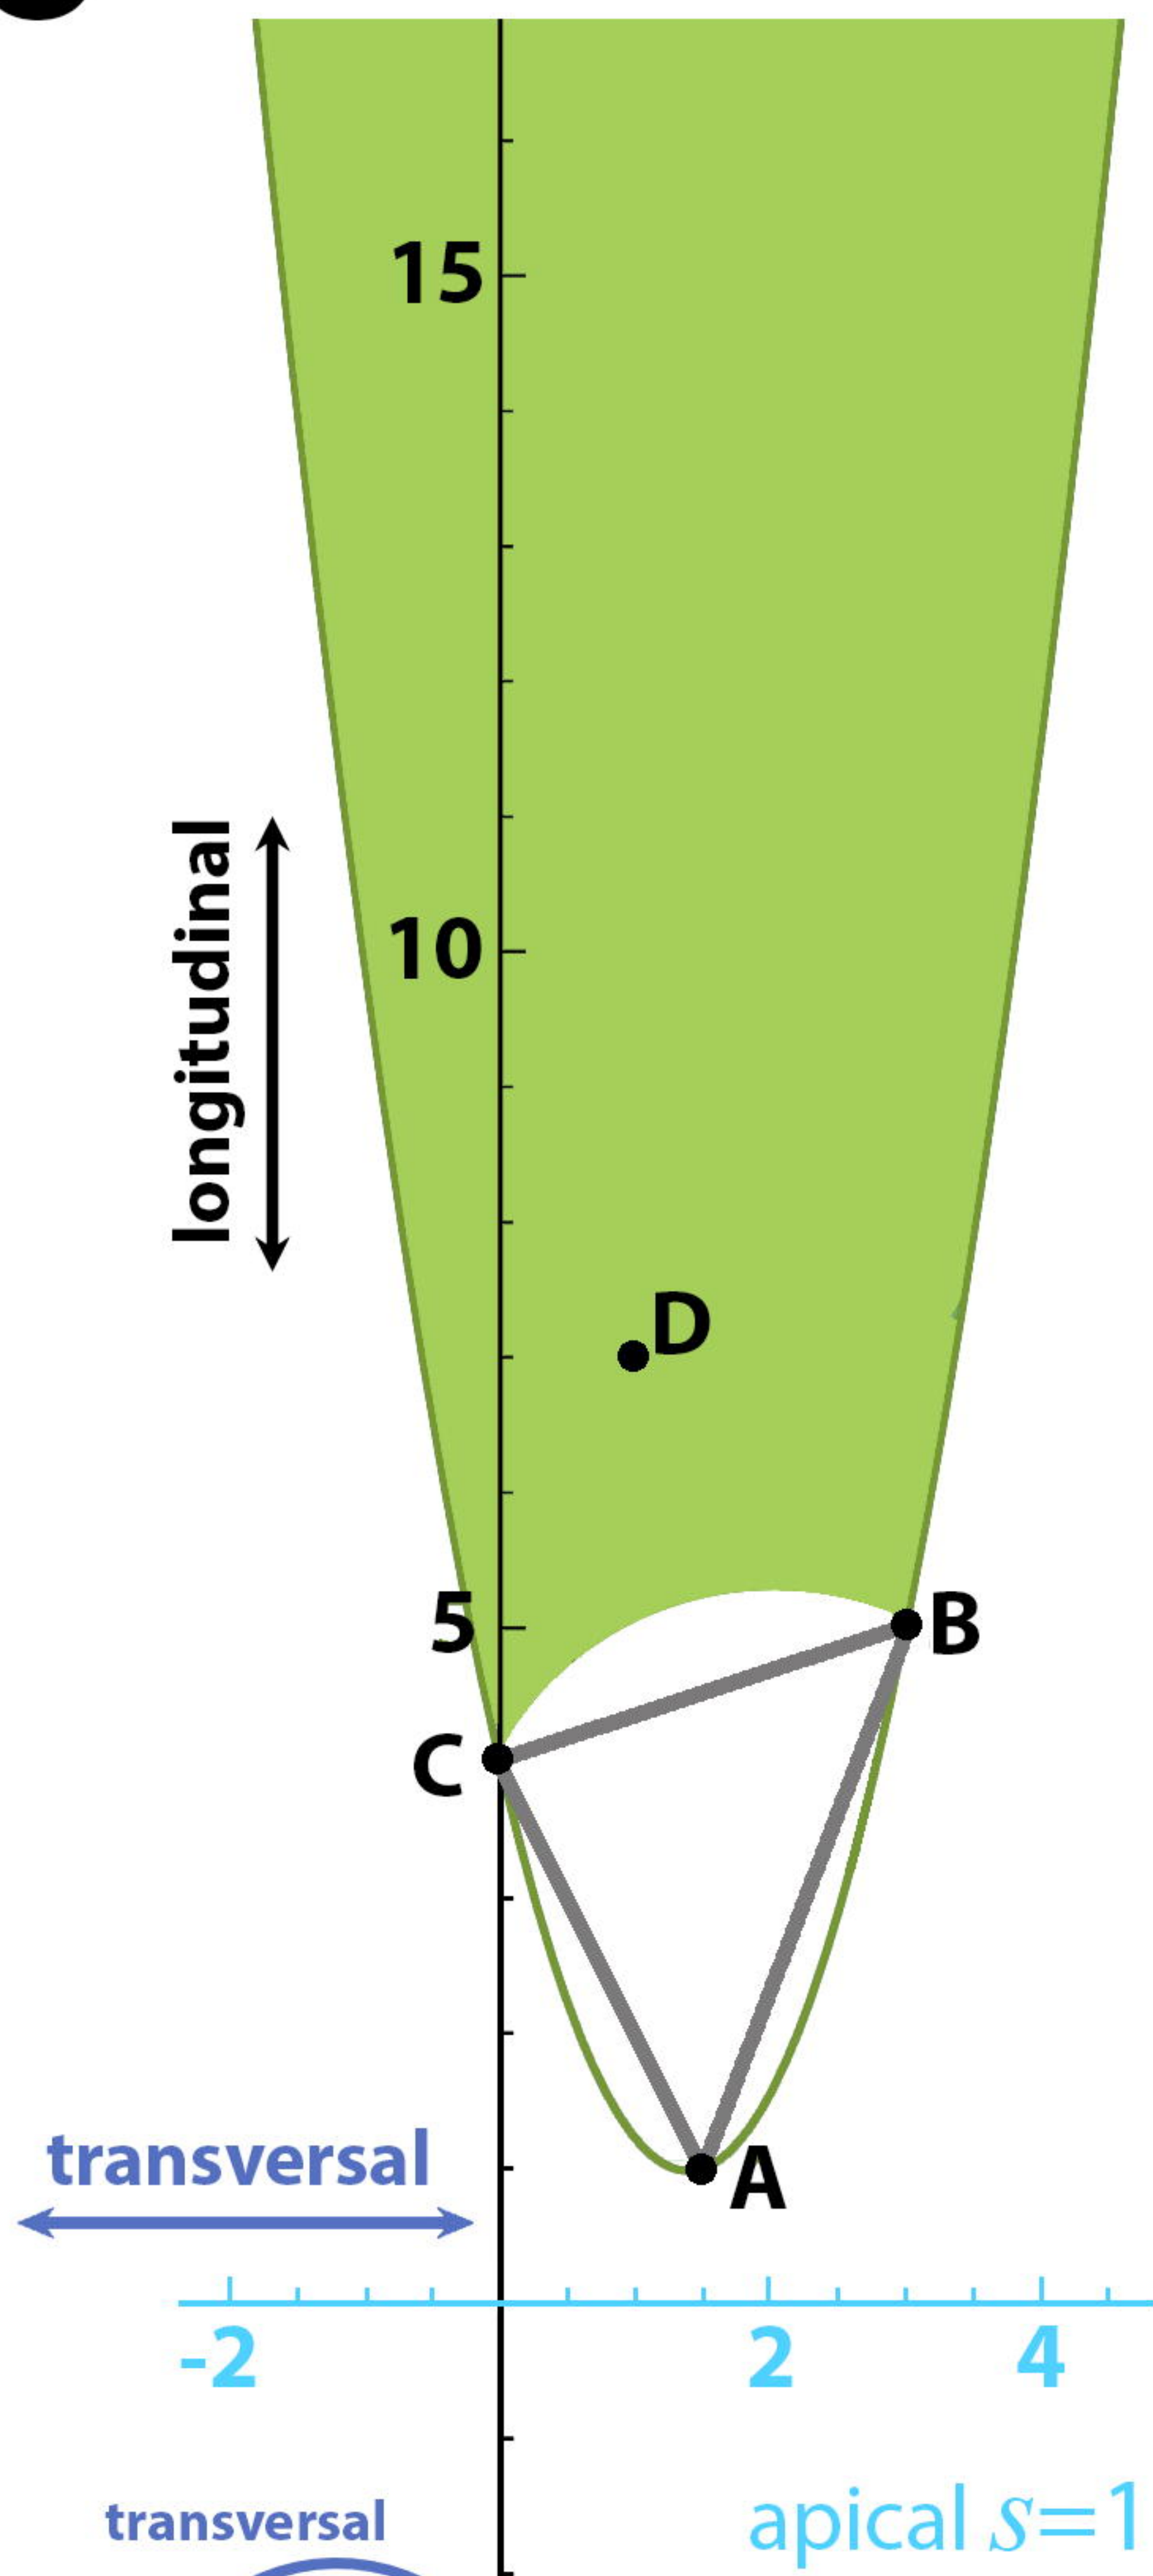

**D**

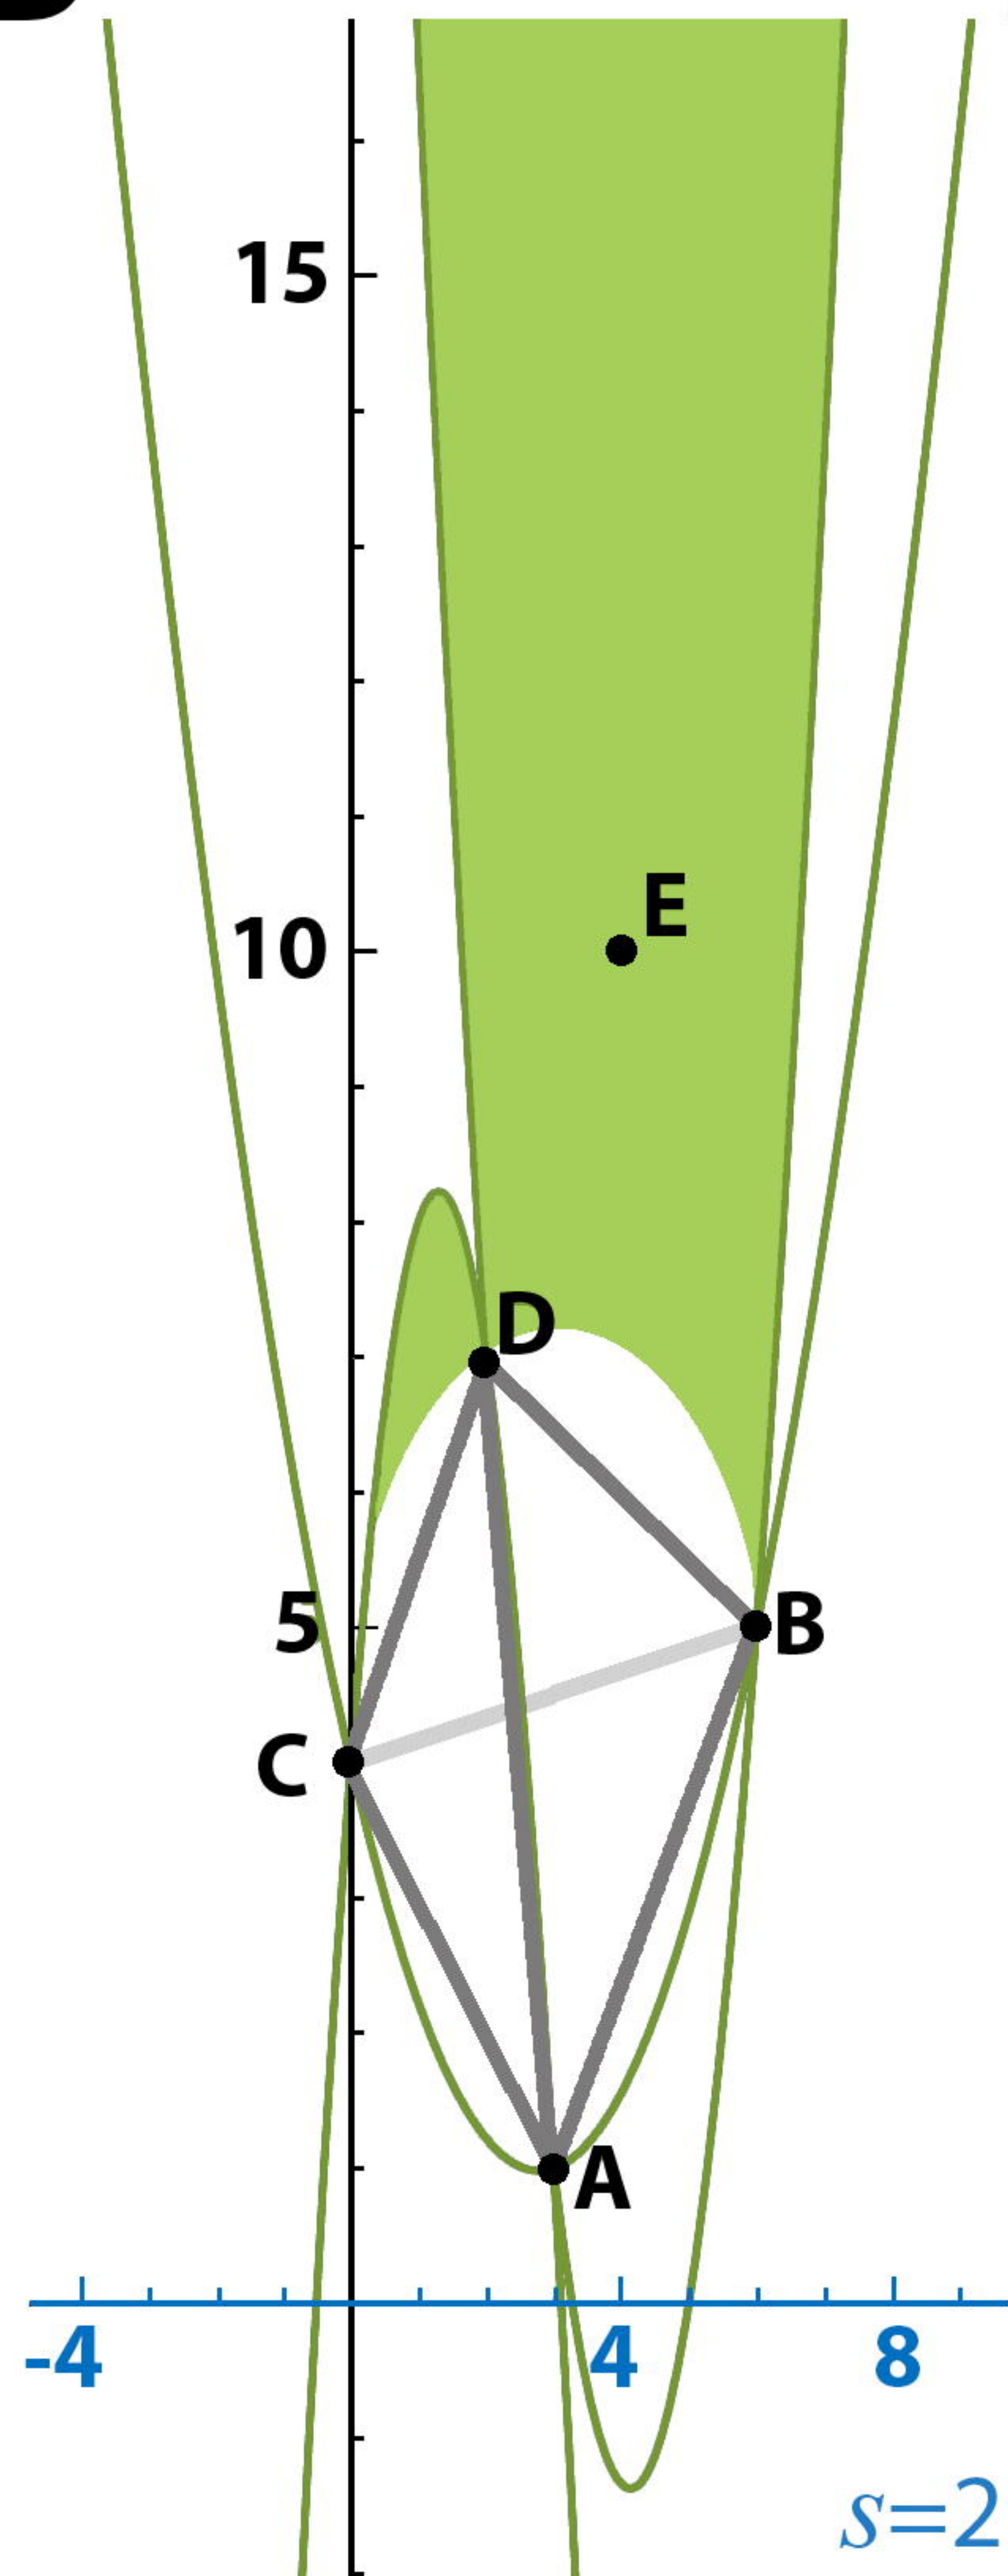

**E**

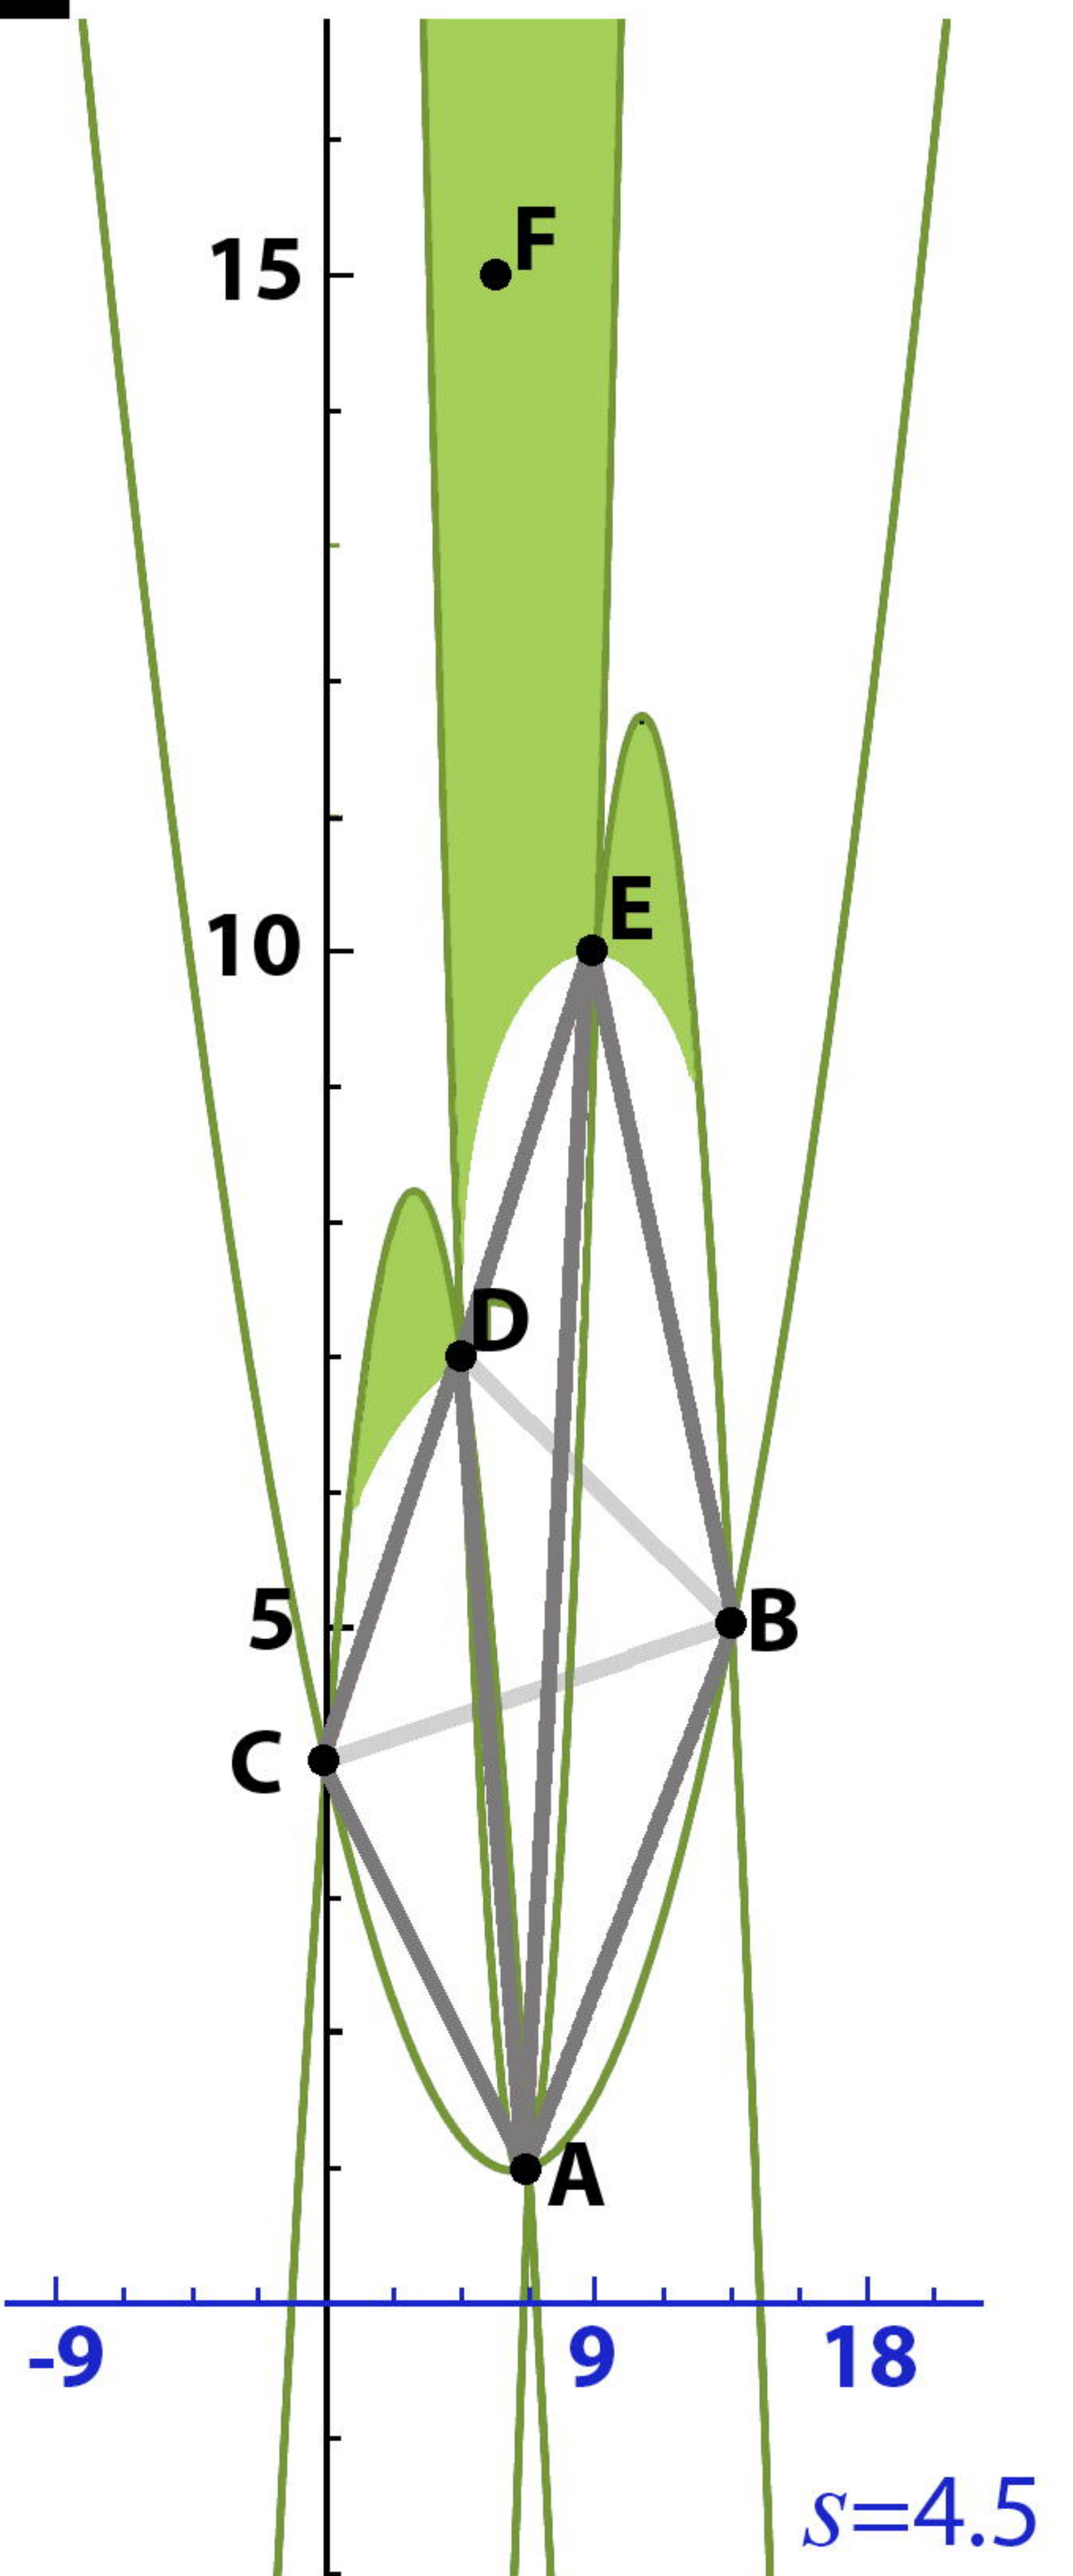

increasing surface ratio ( $s$ )



# A

spatial T1 transition

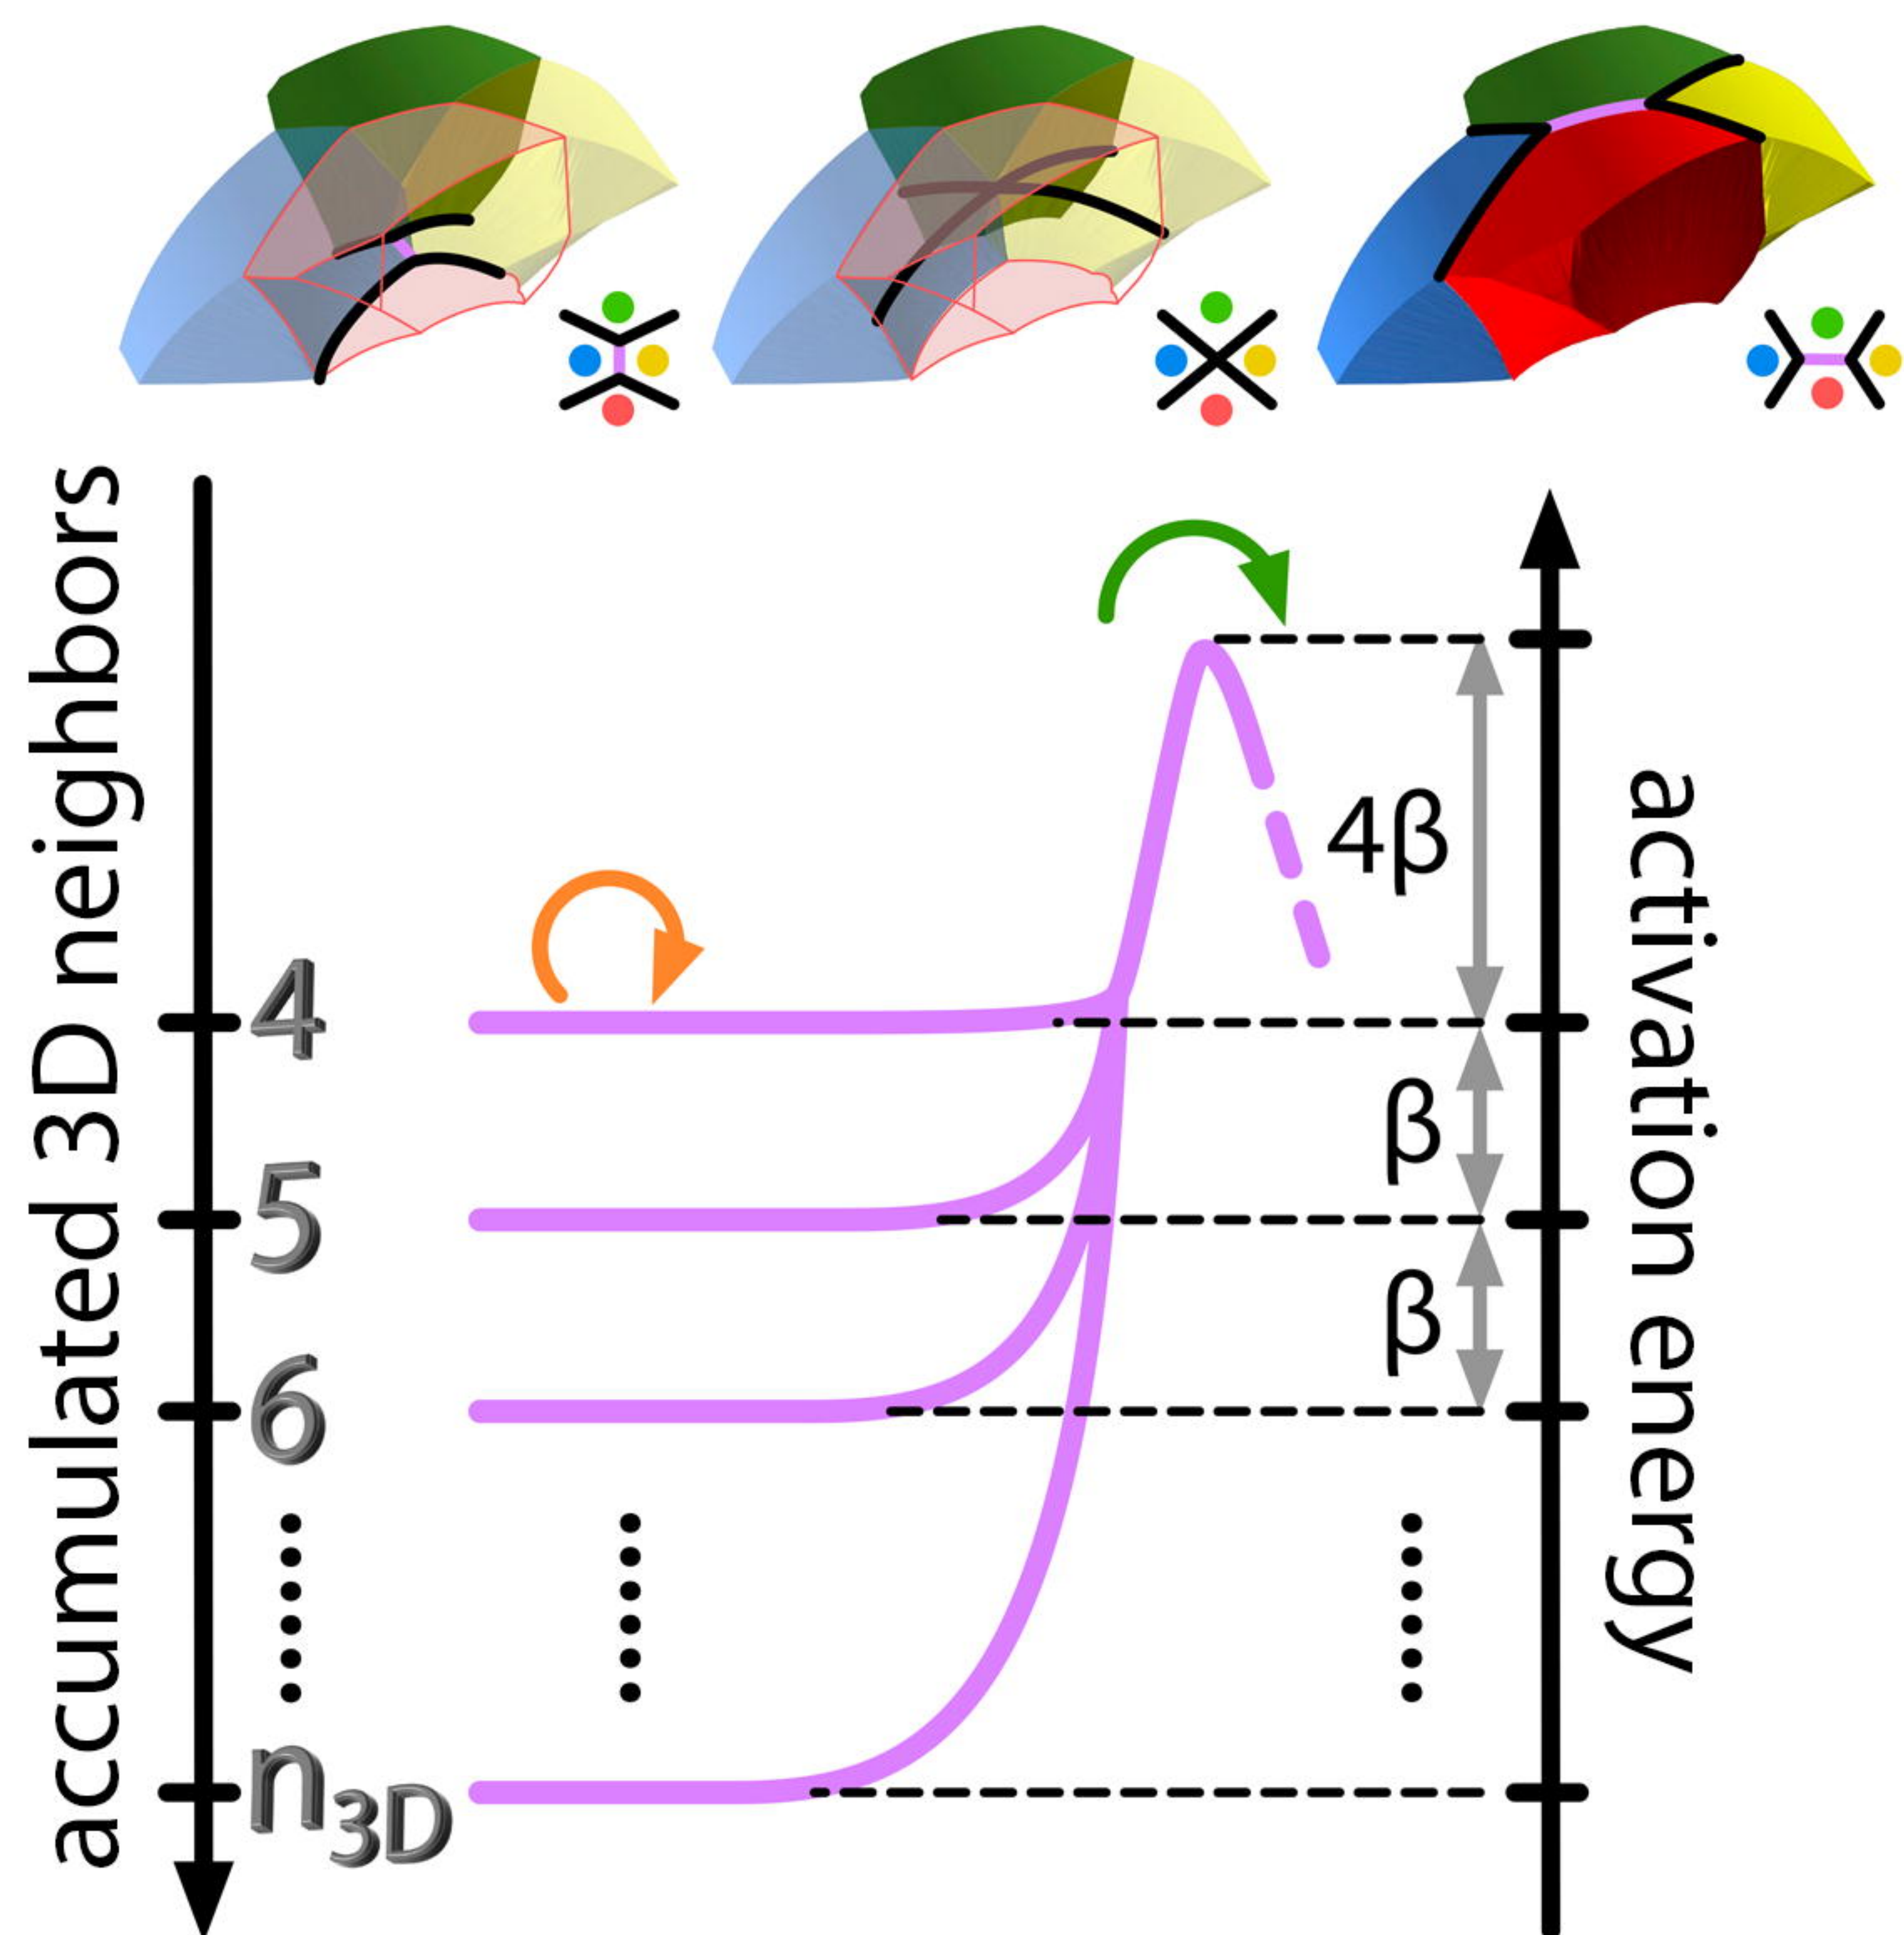

# B

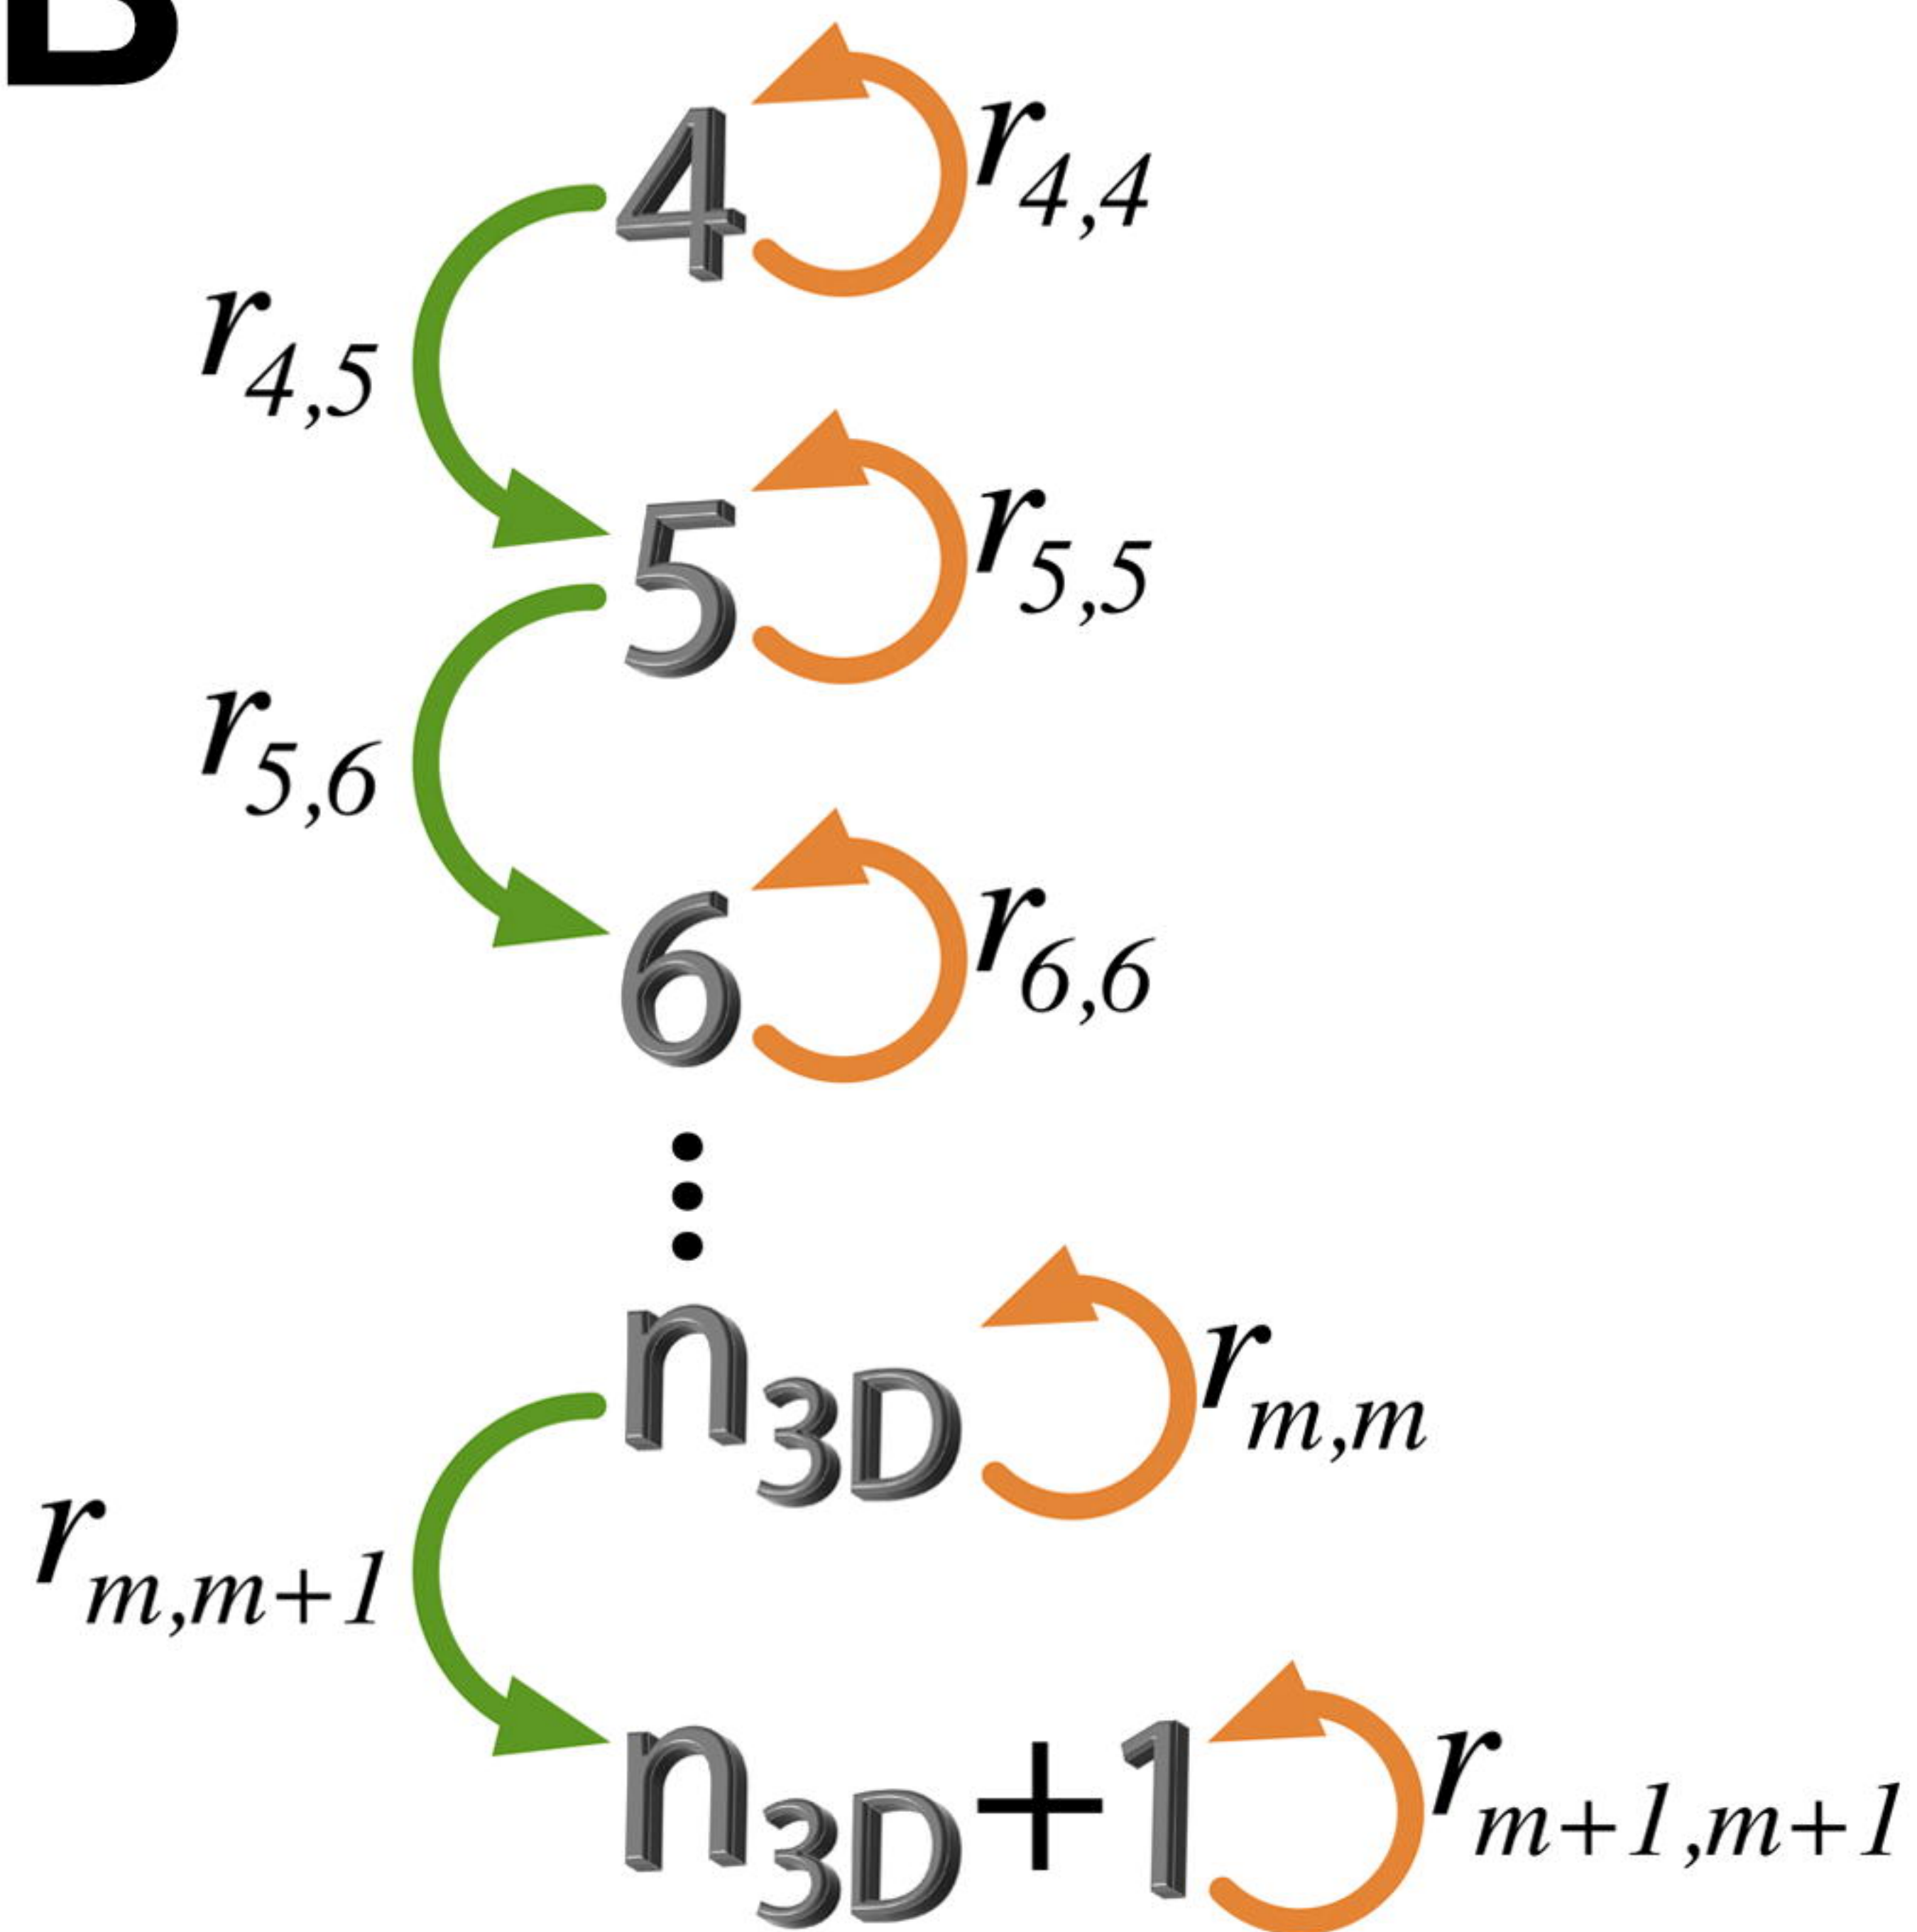

$$r_{m,m+1} = \alpha(N_{max}-m)e^{-\beta m}$$

# C

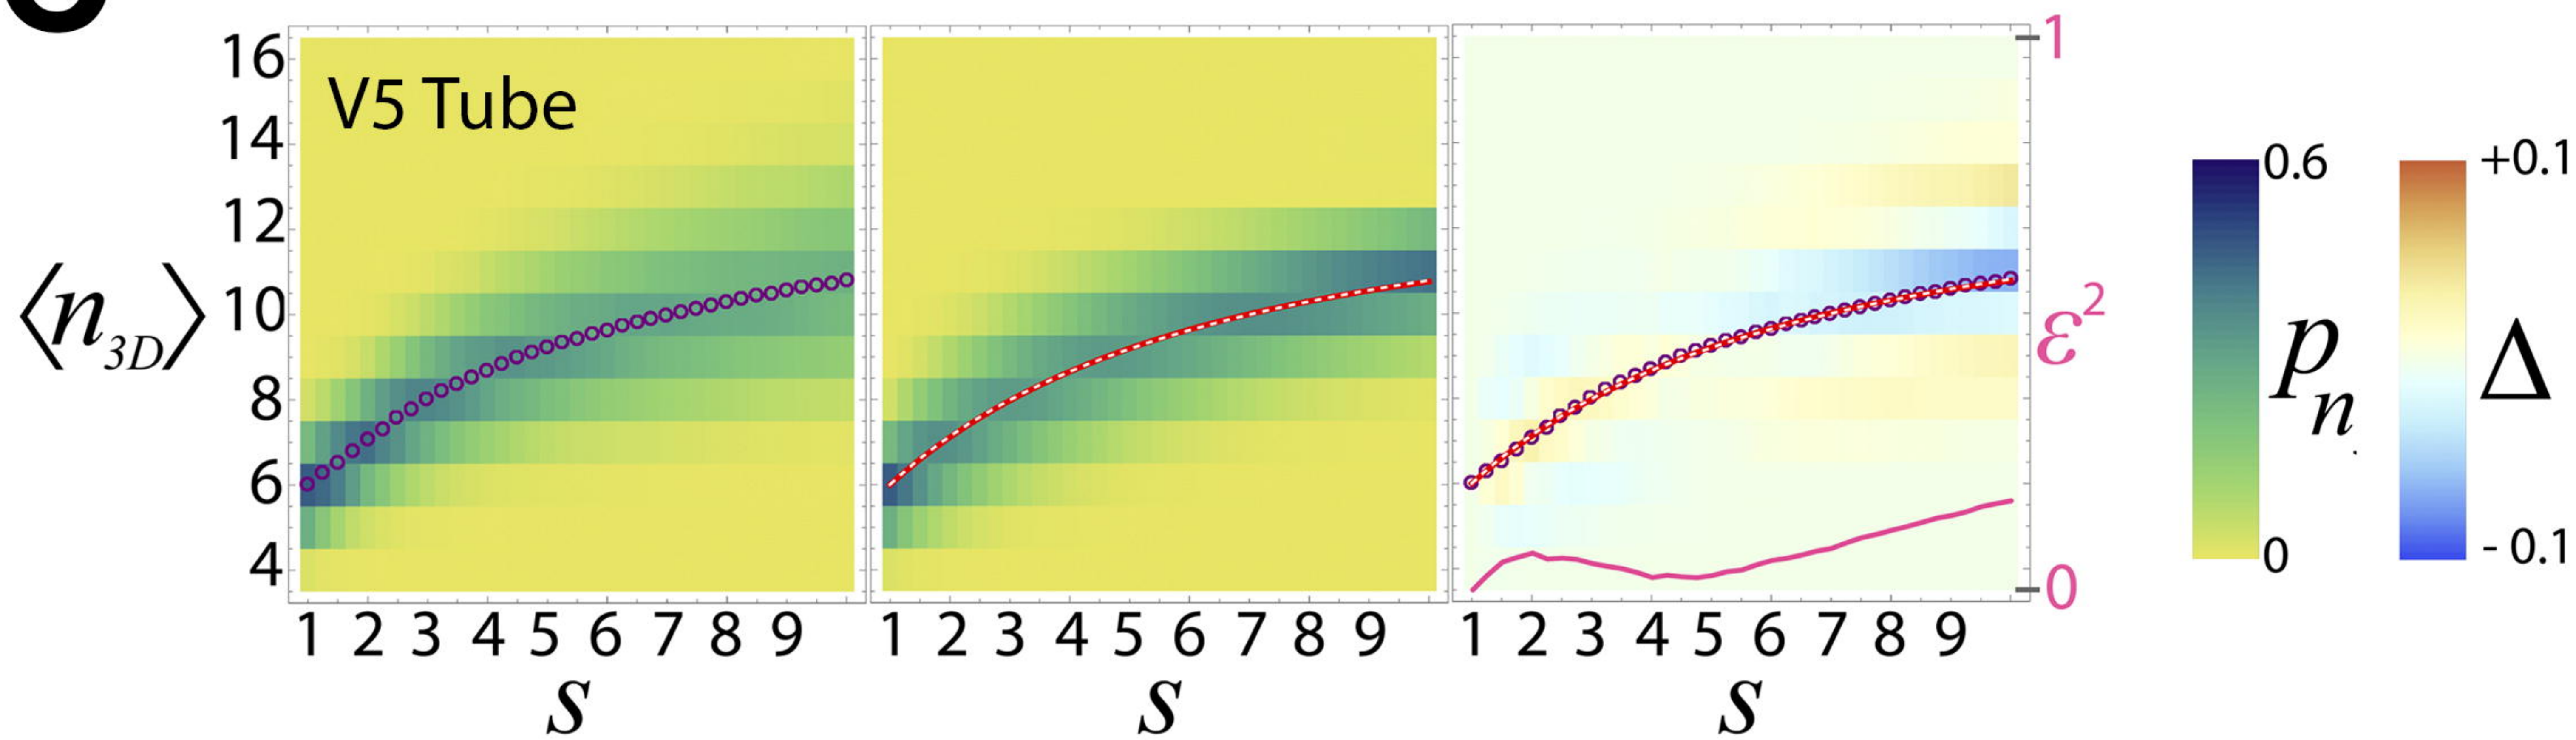



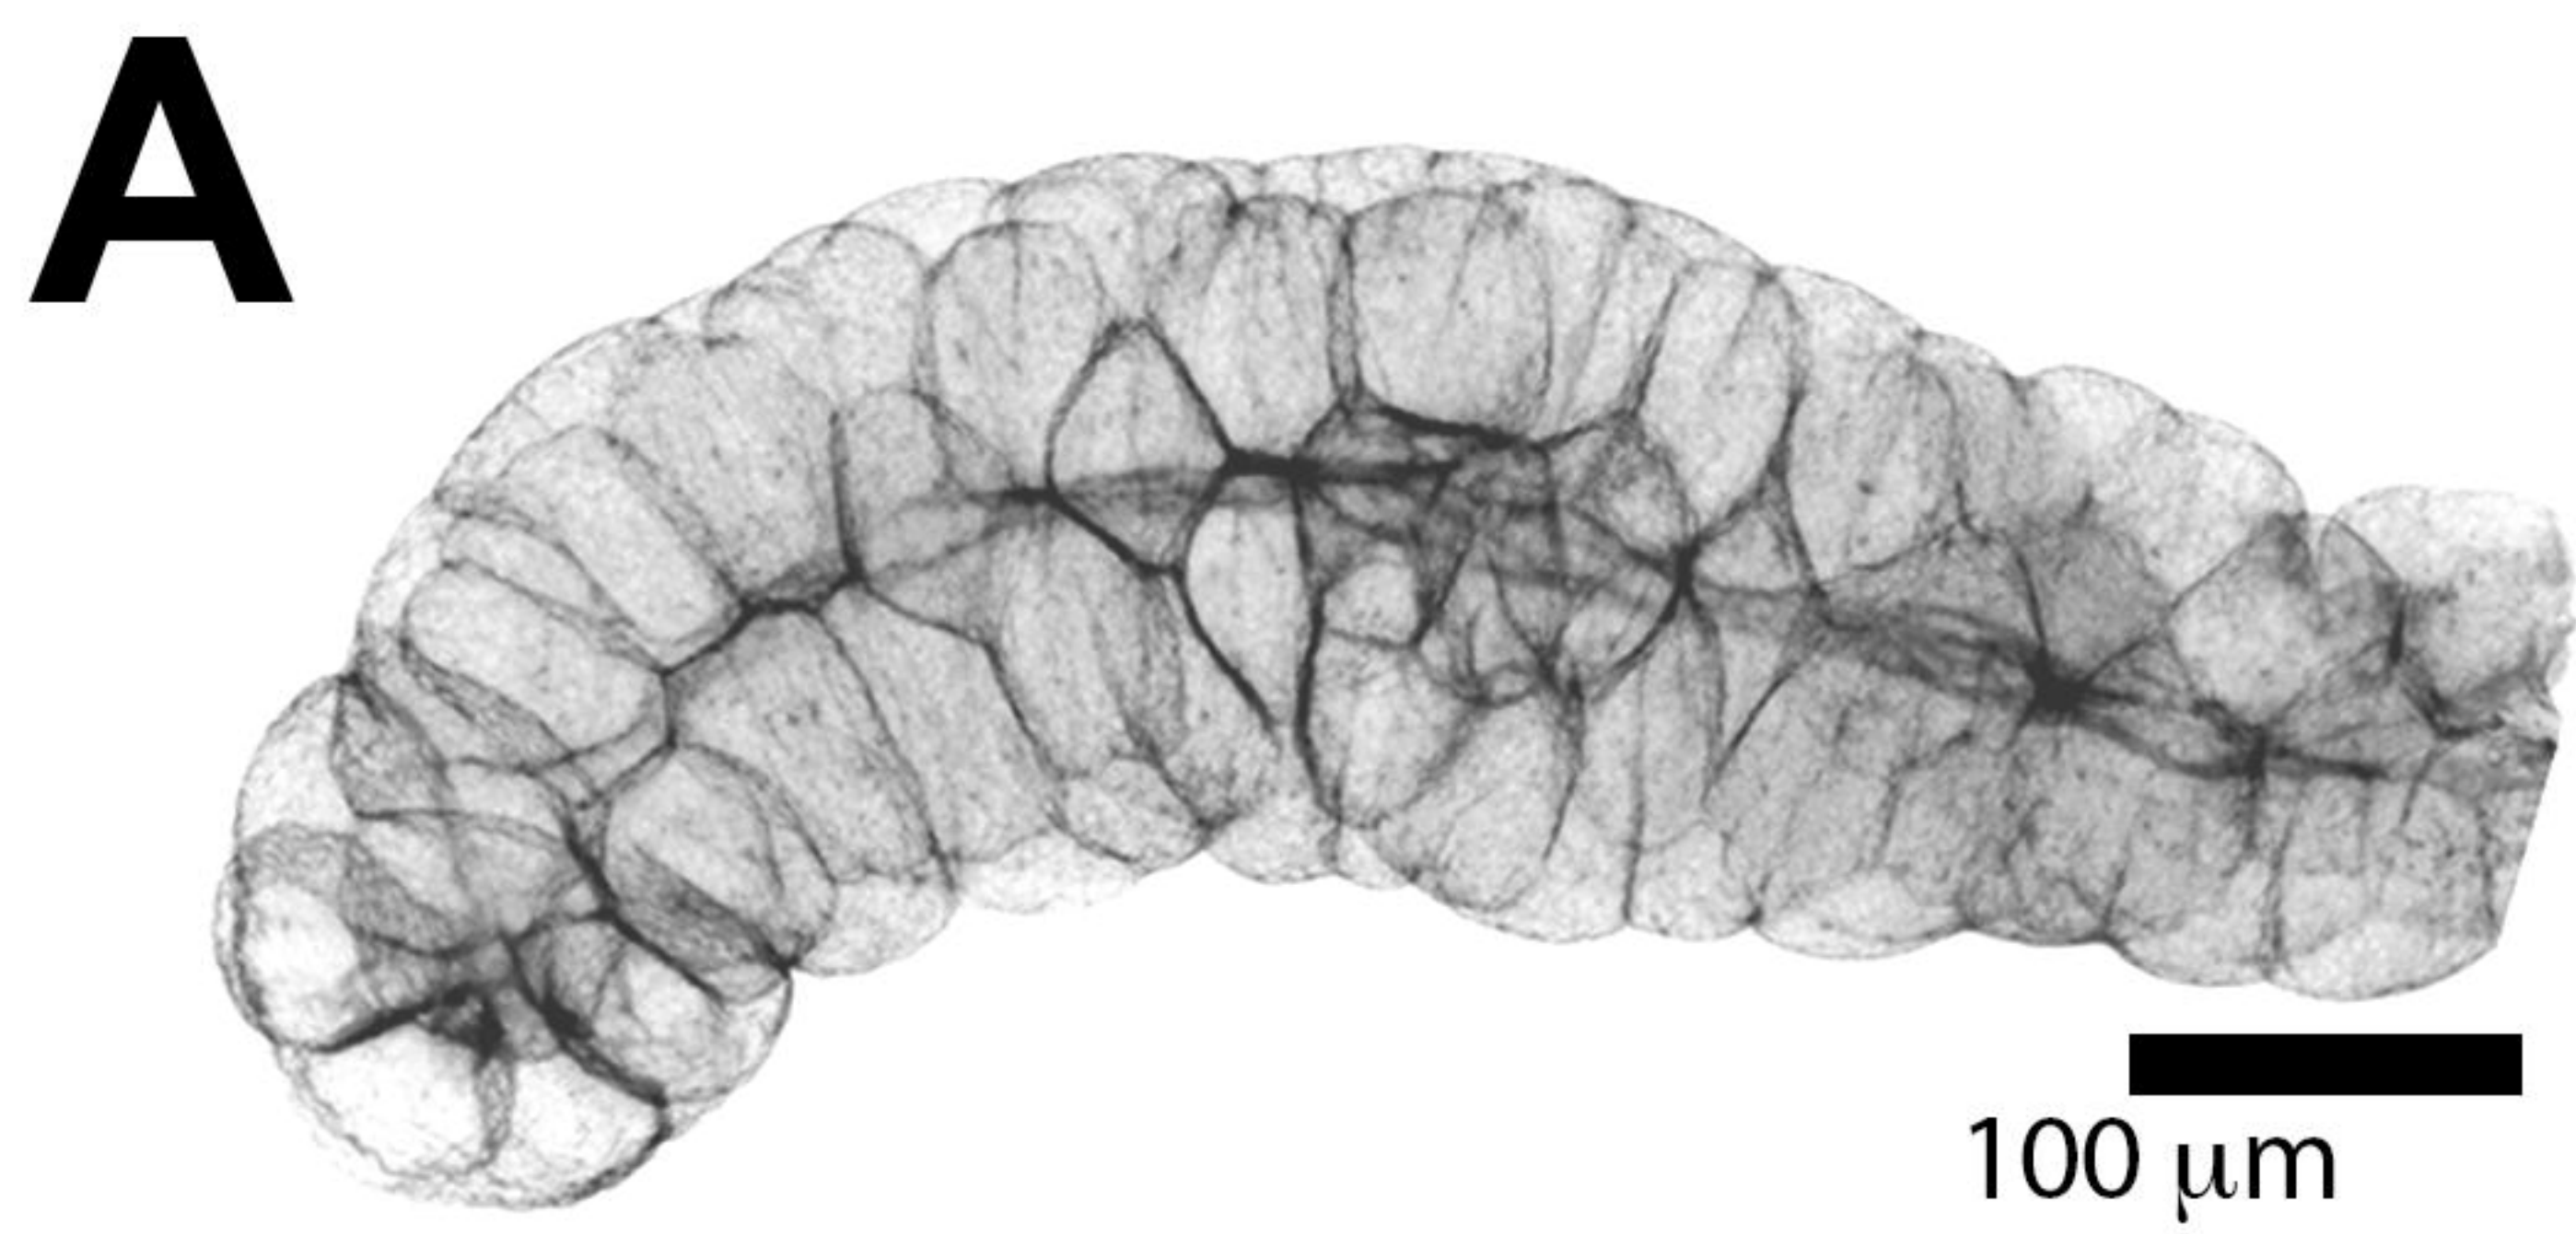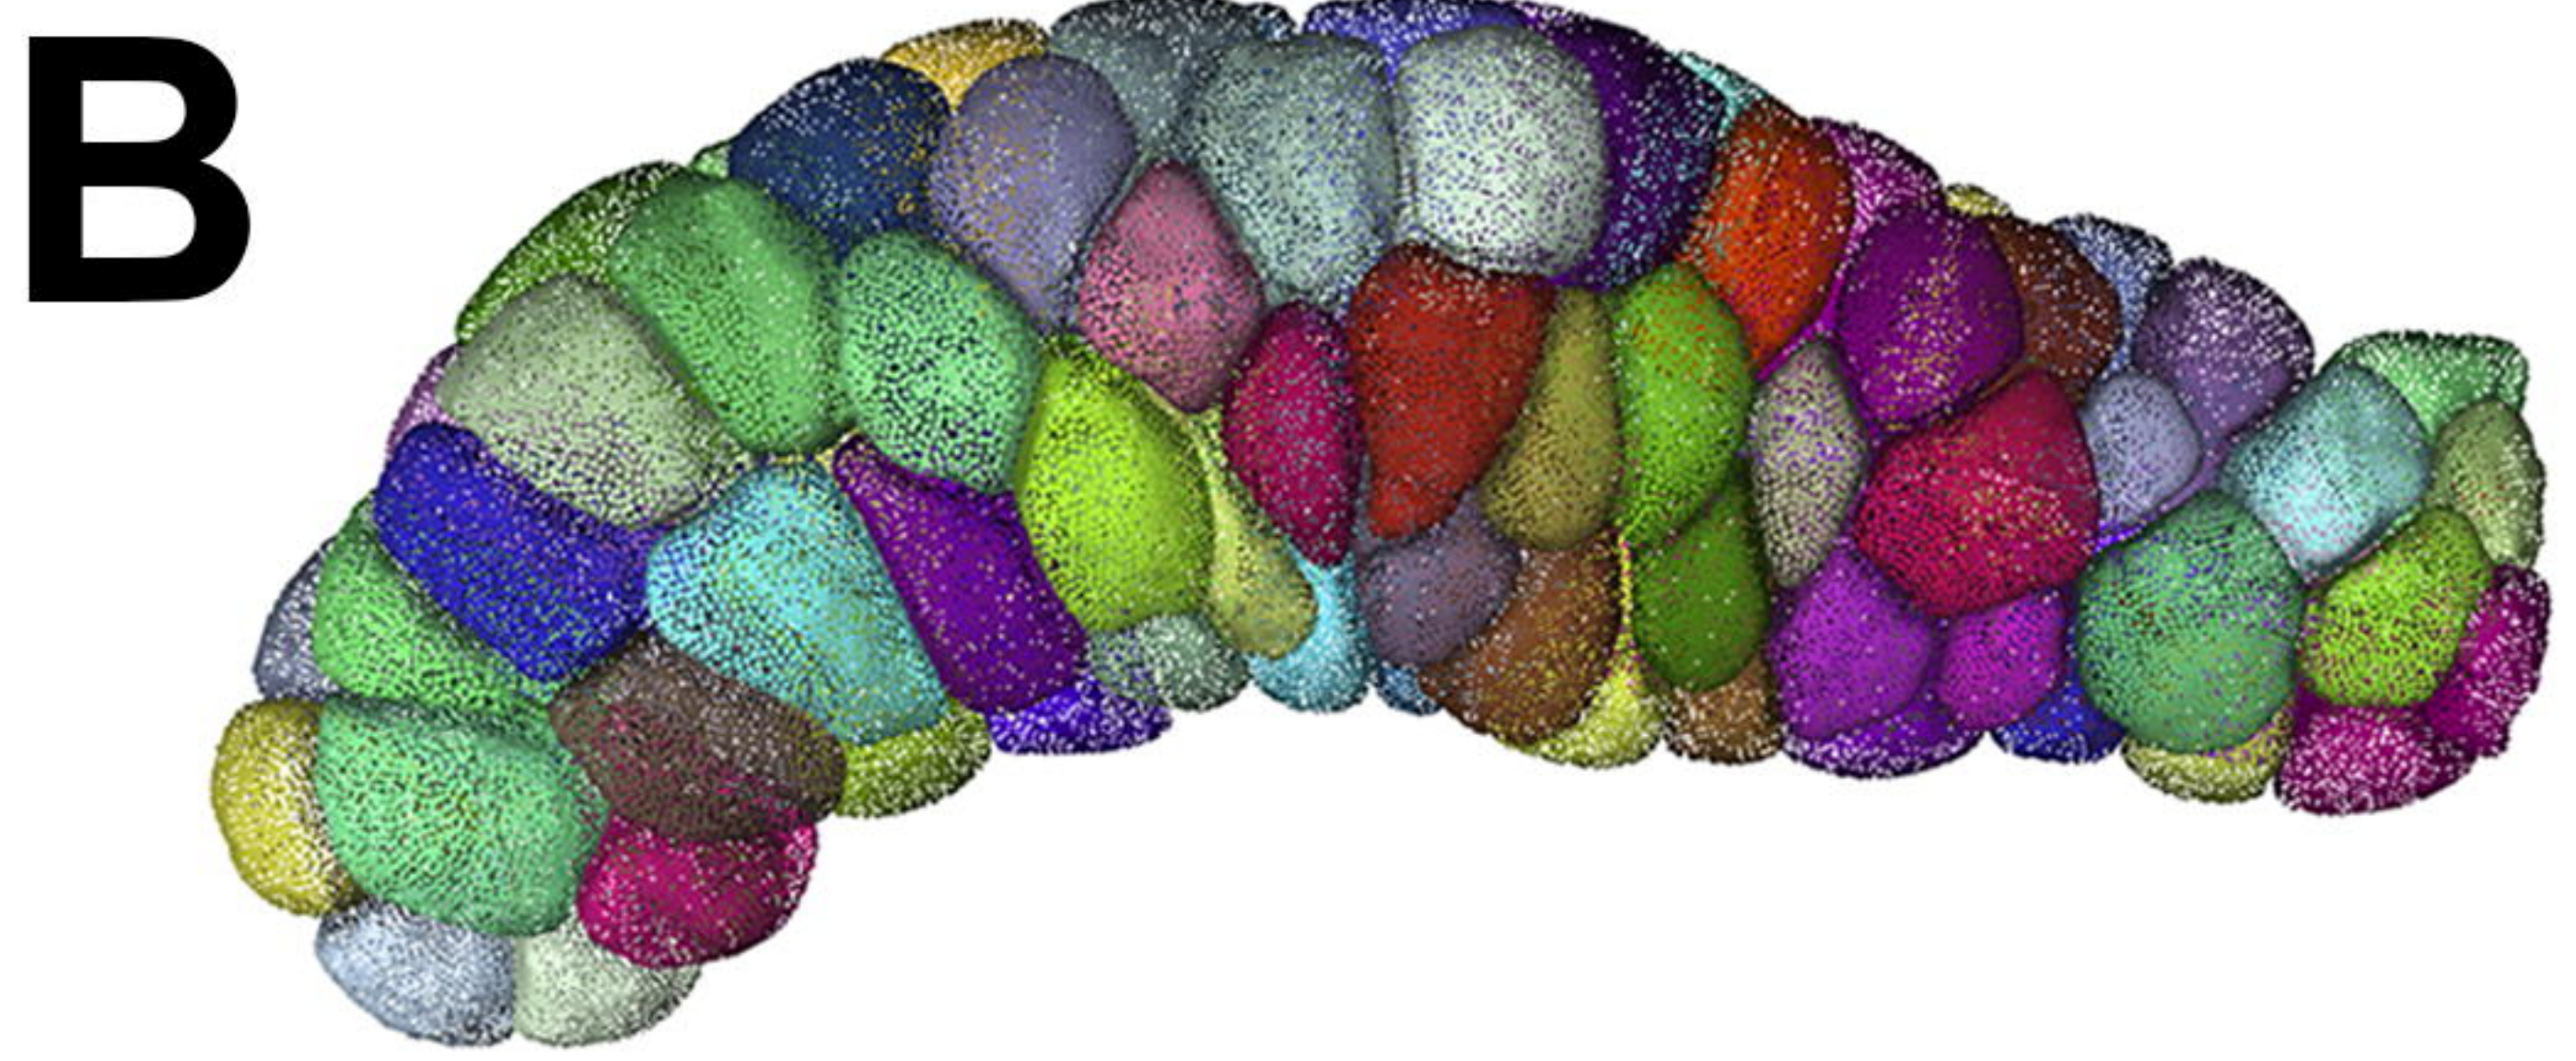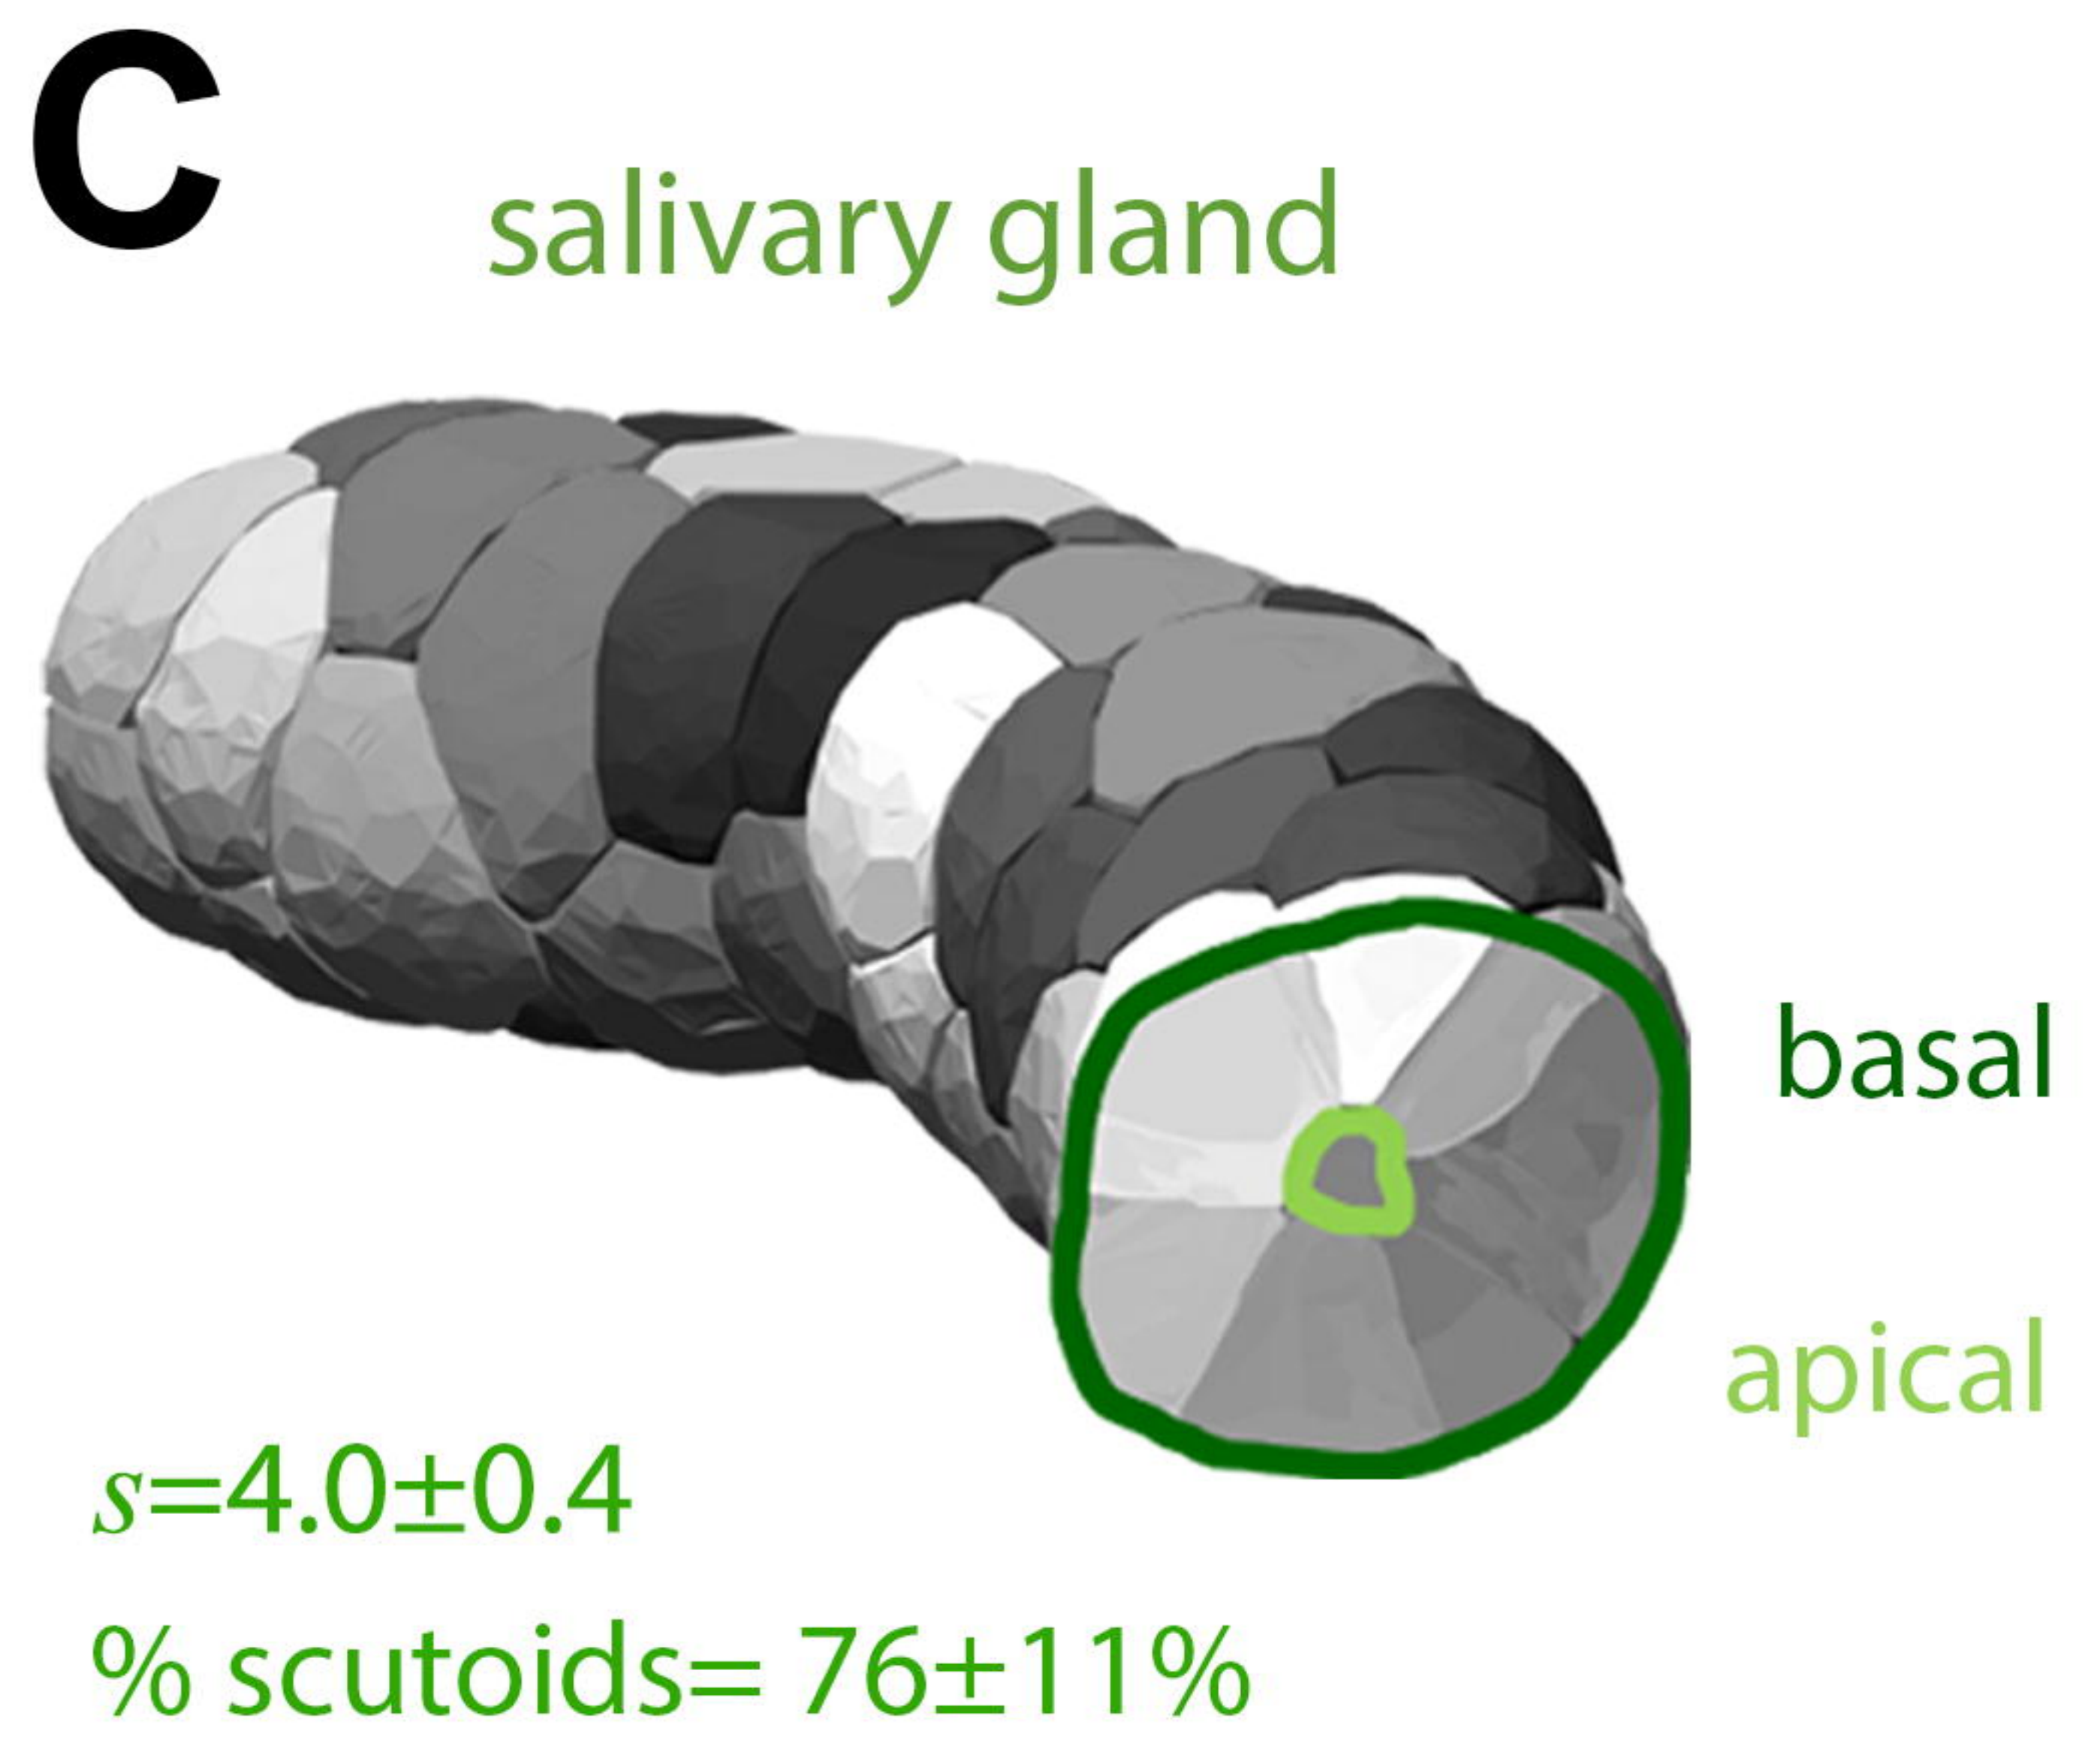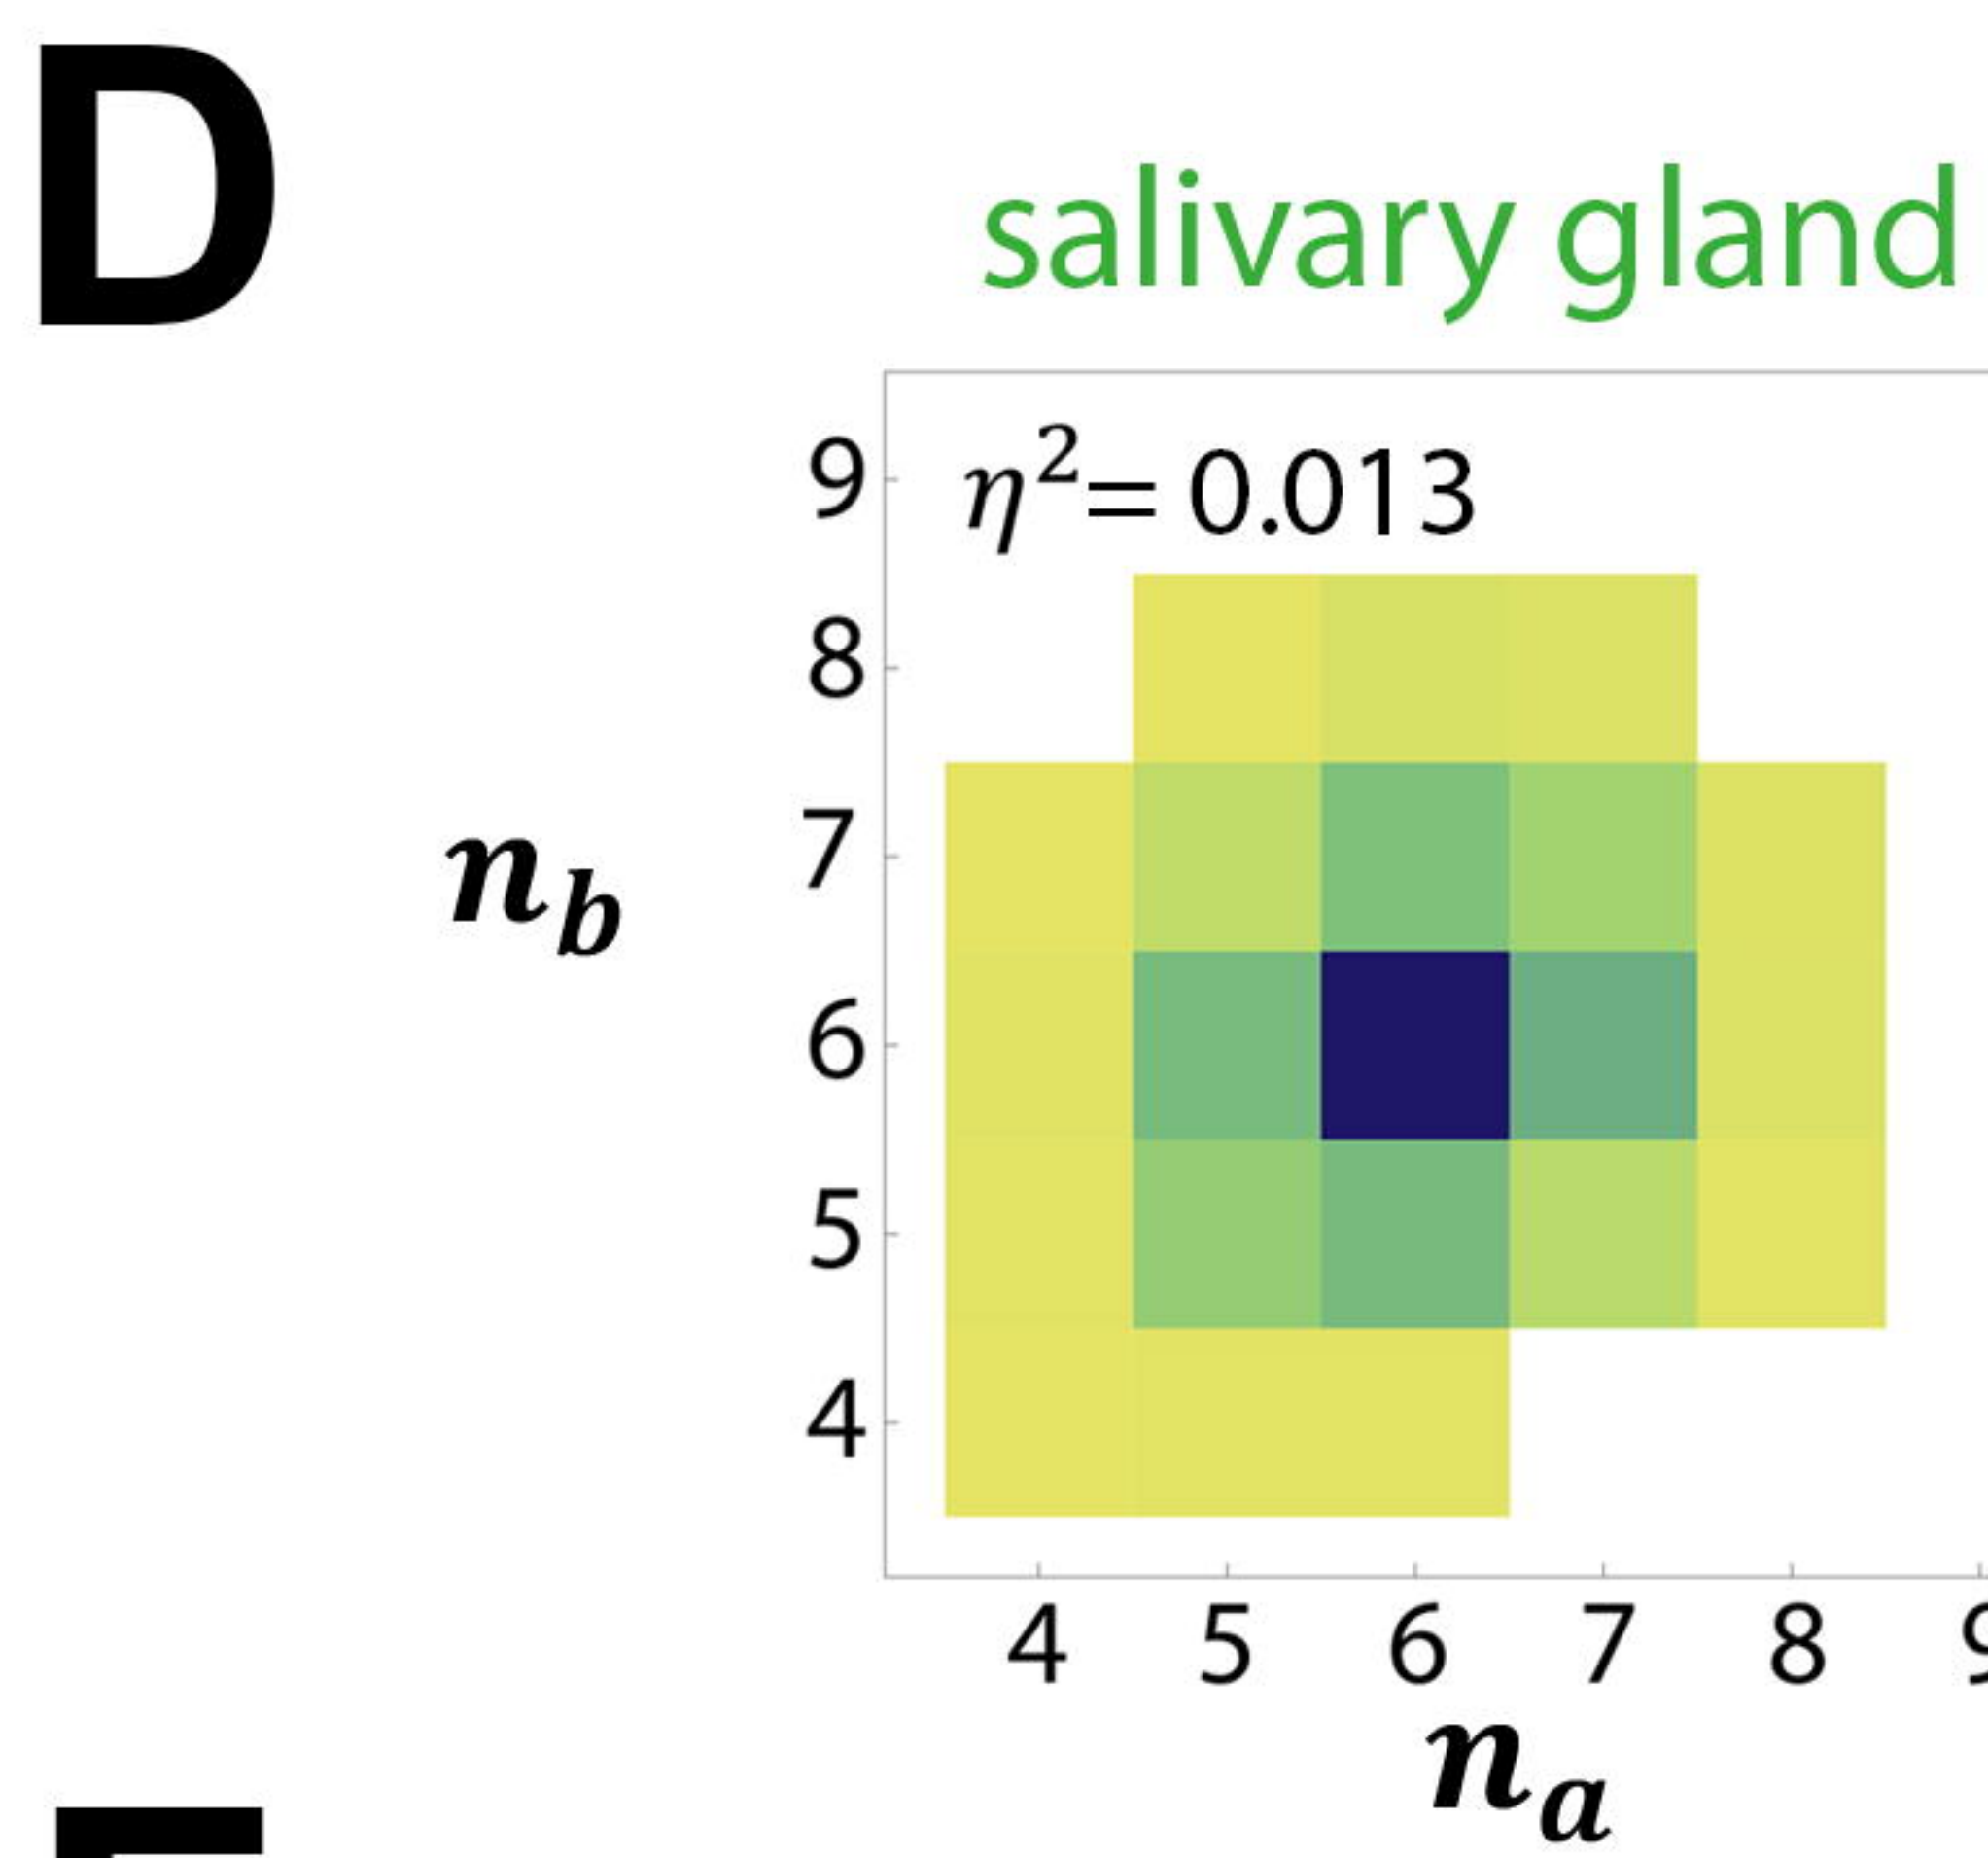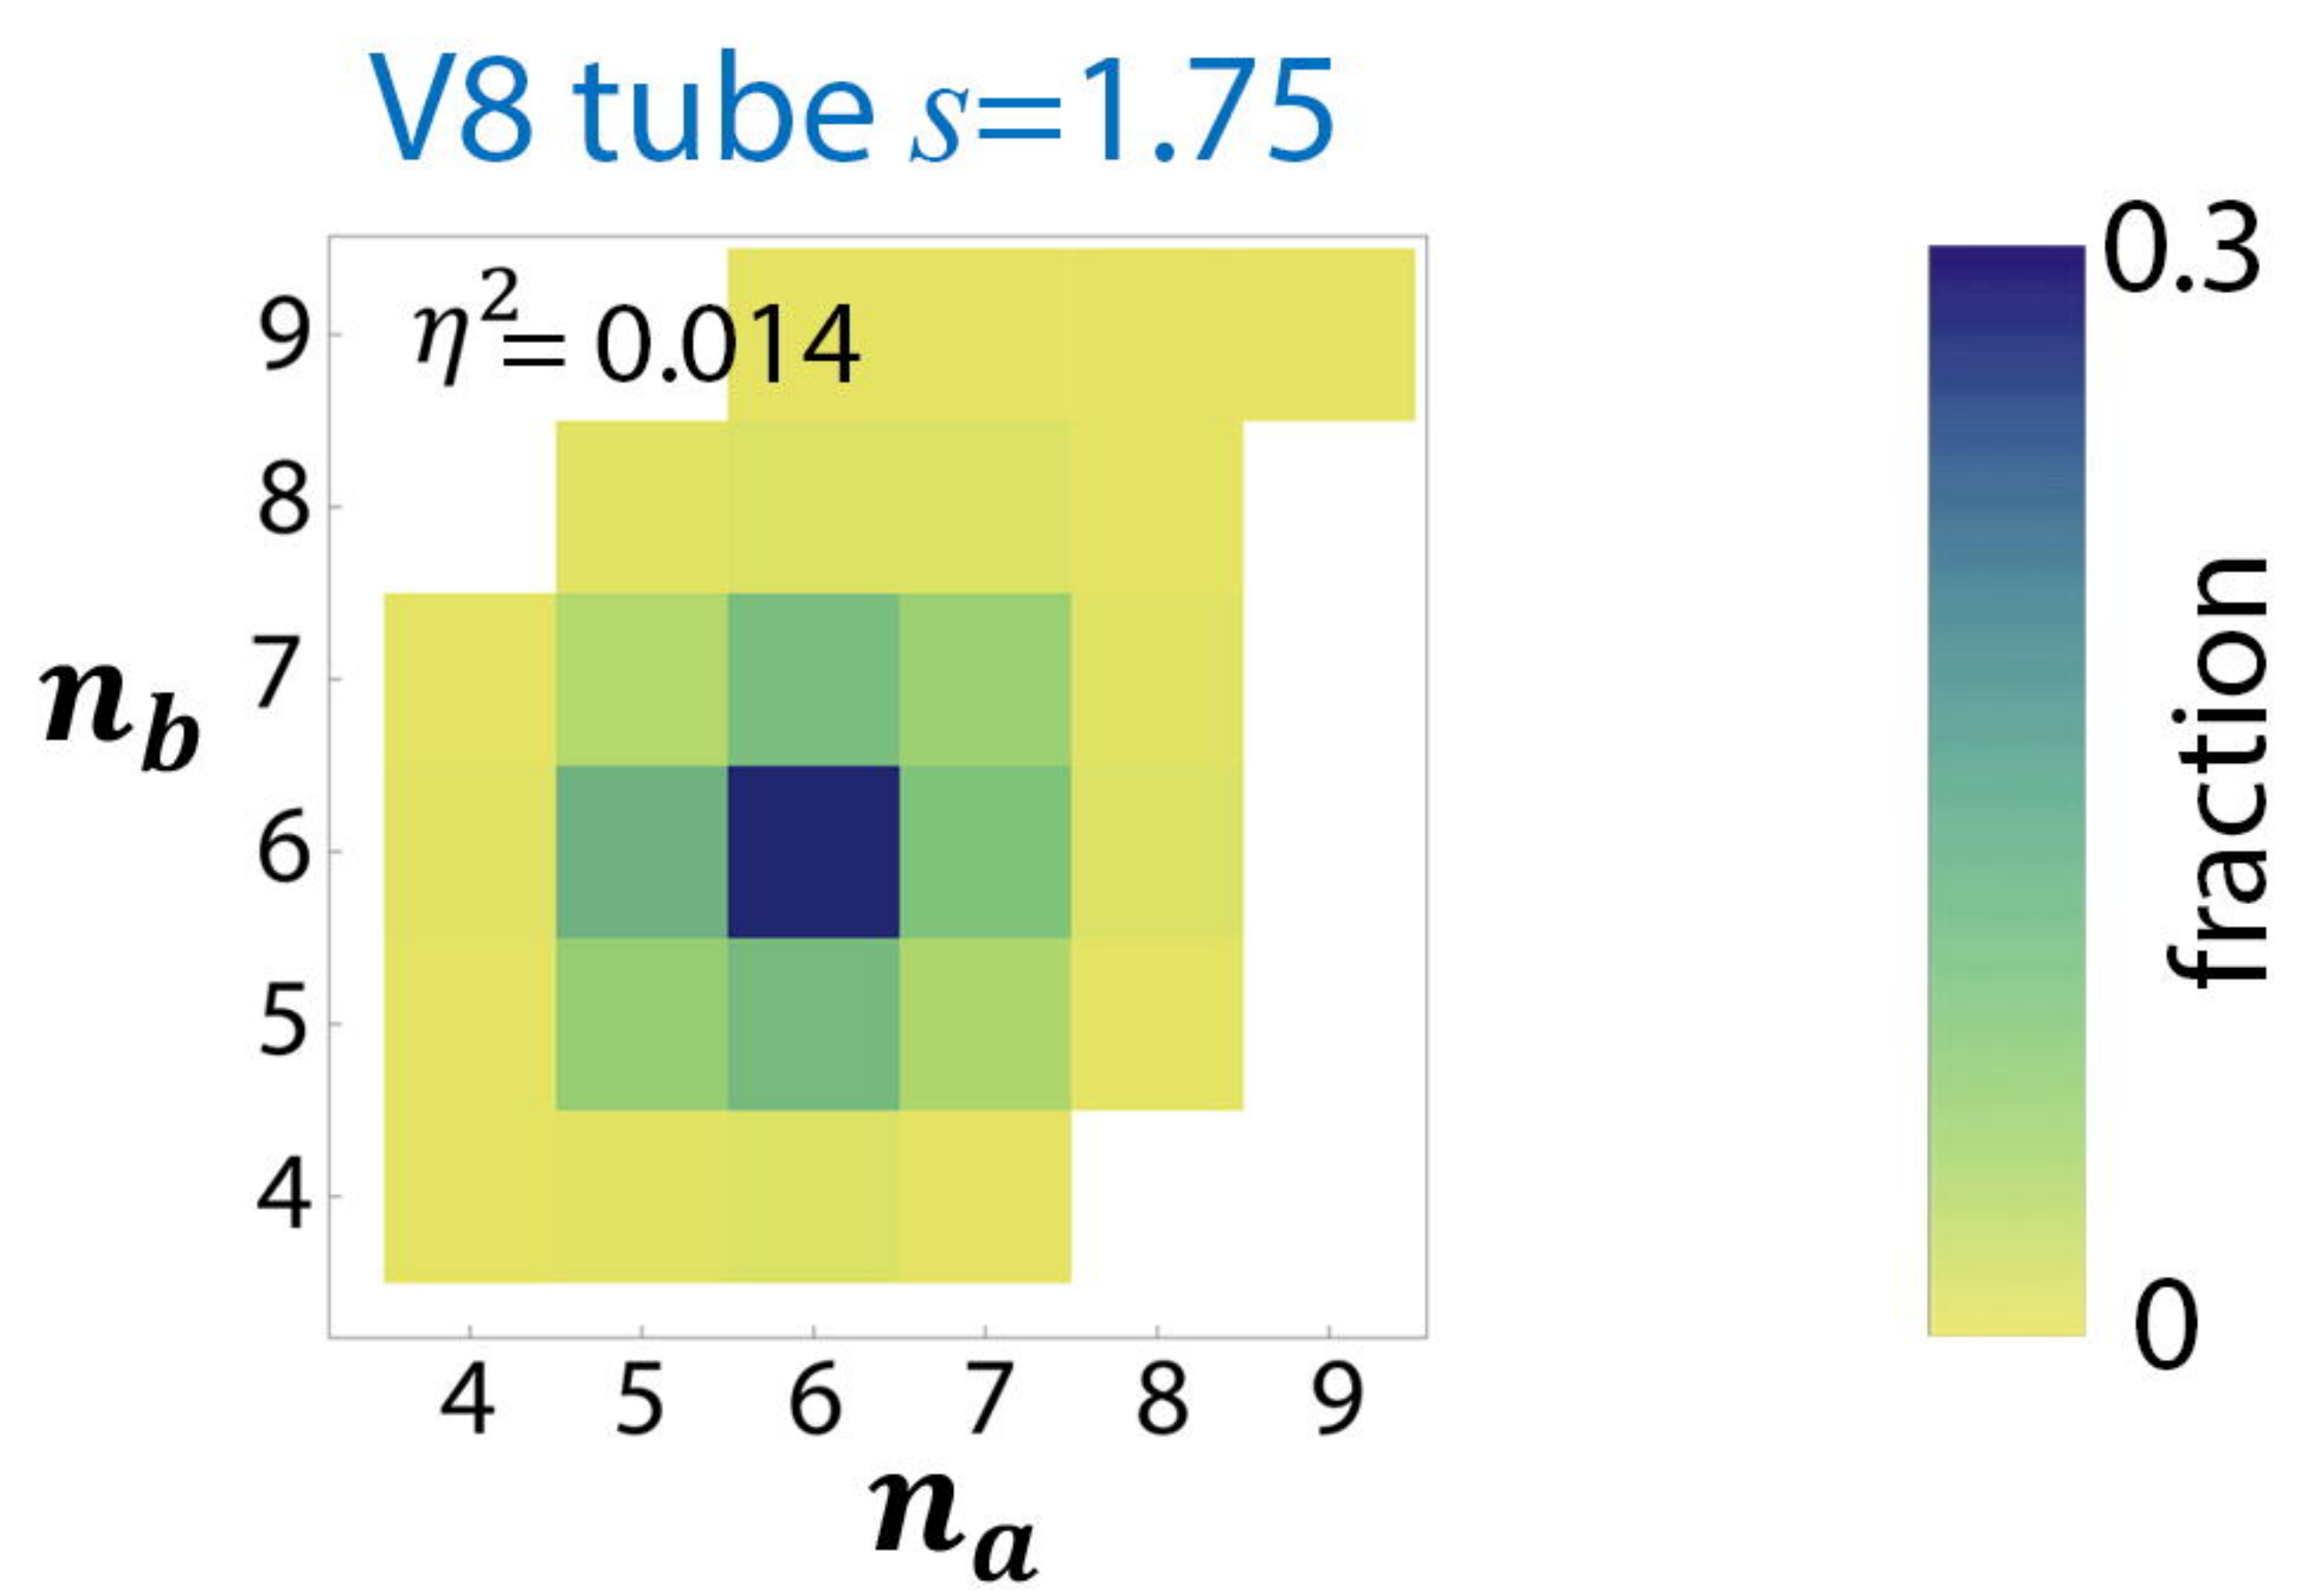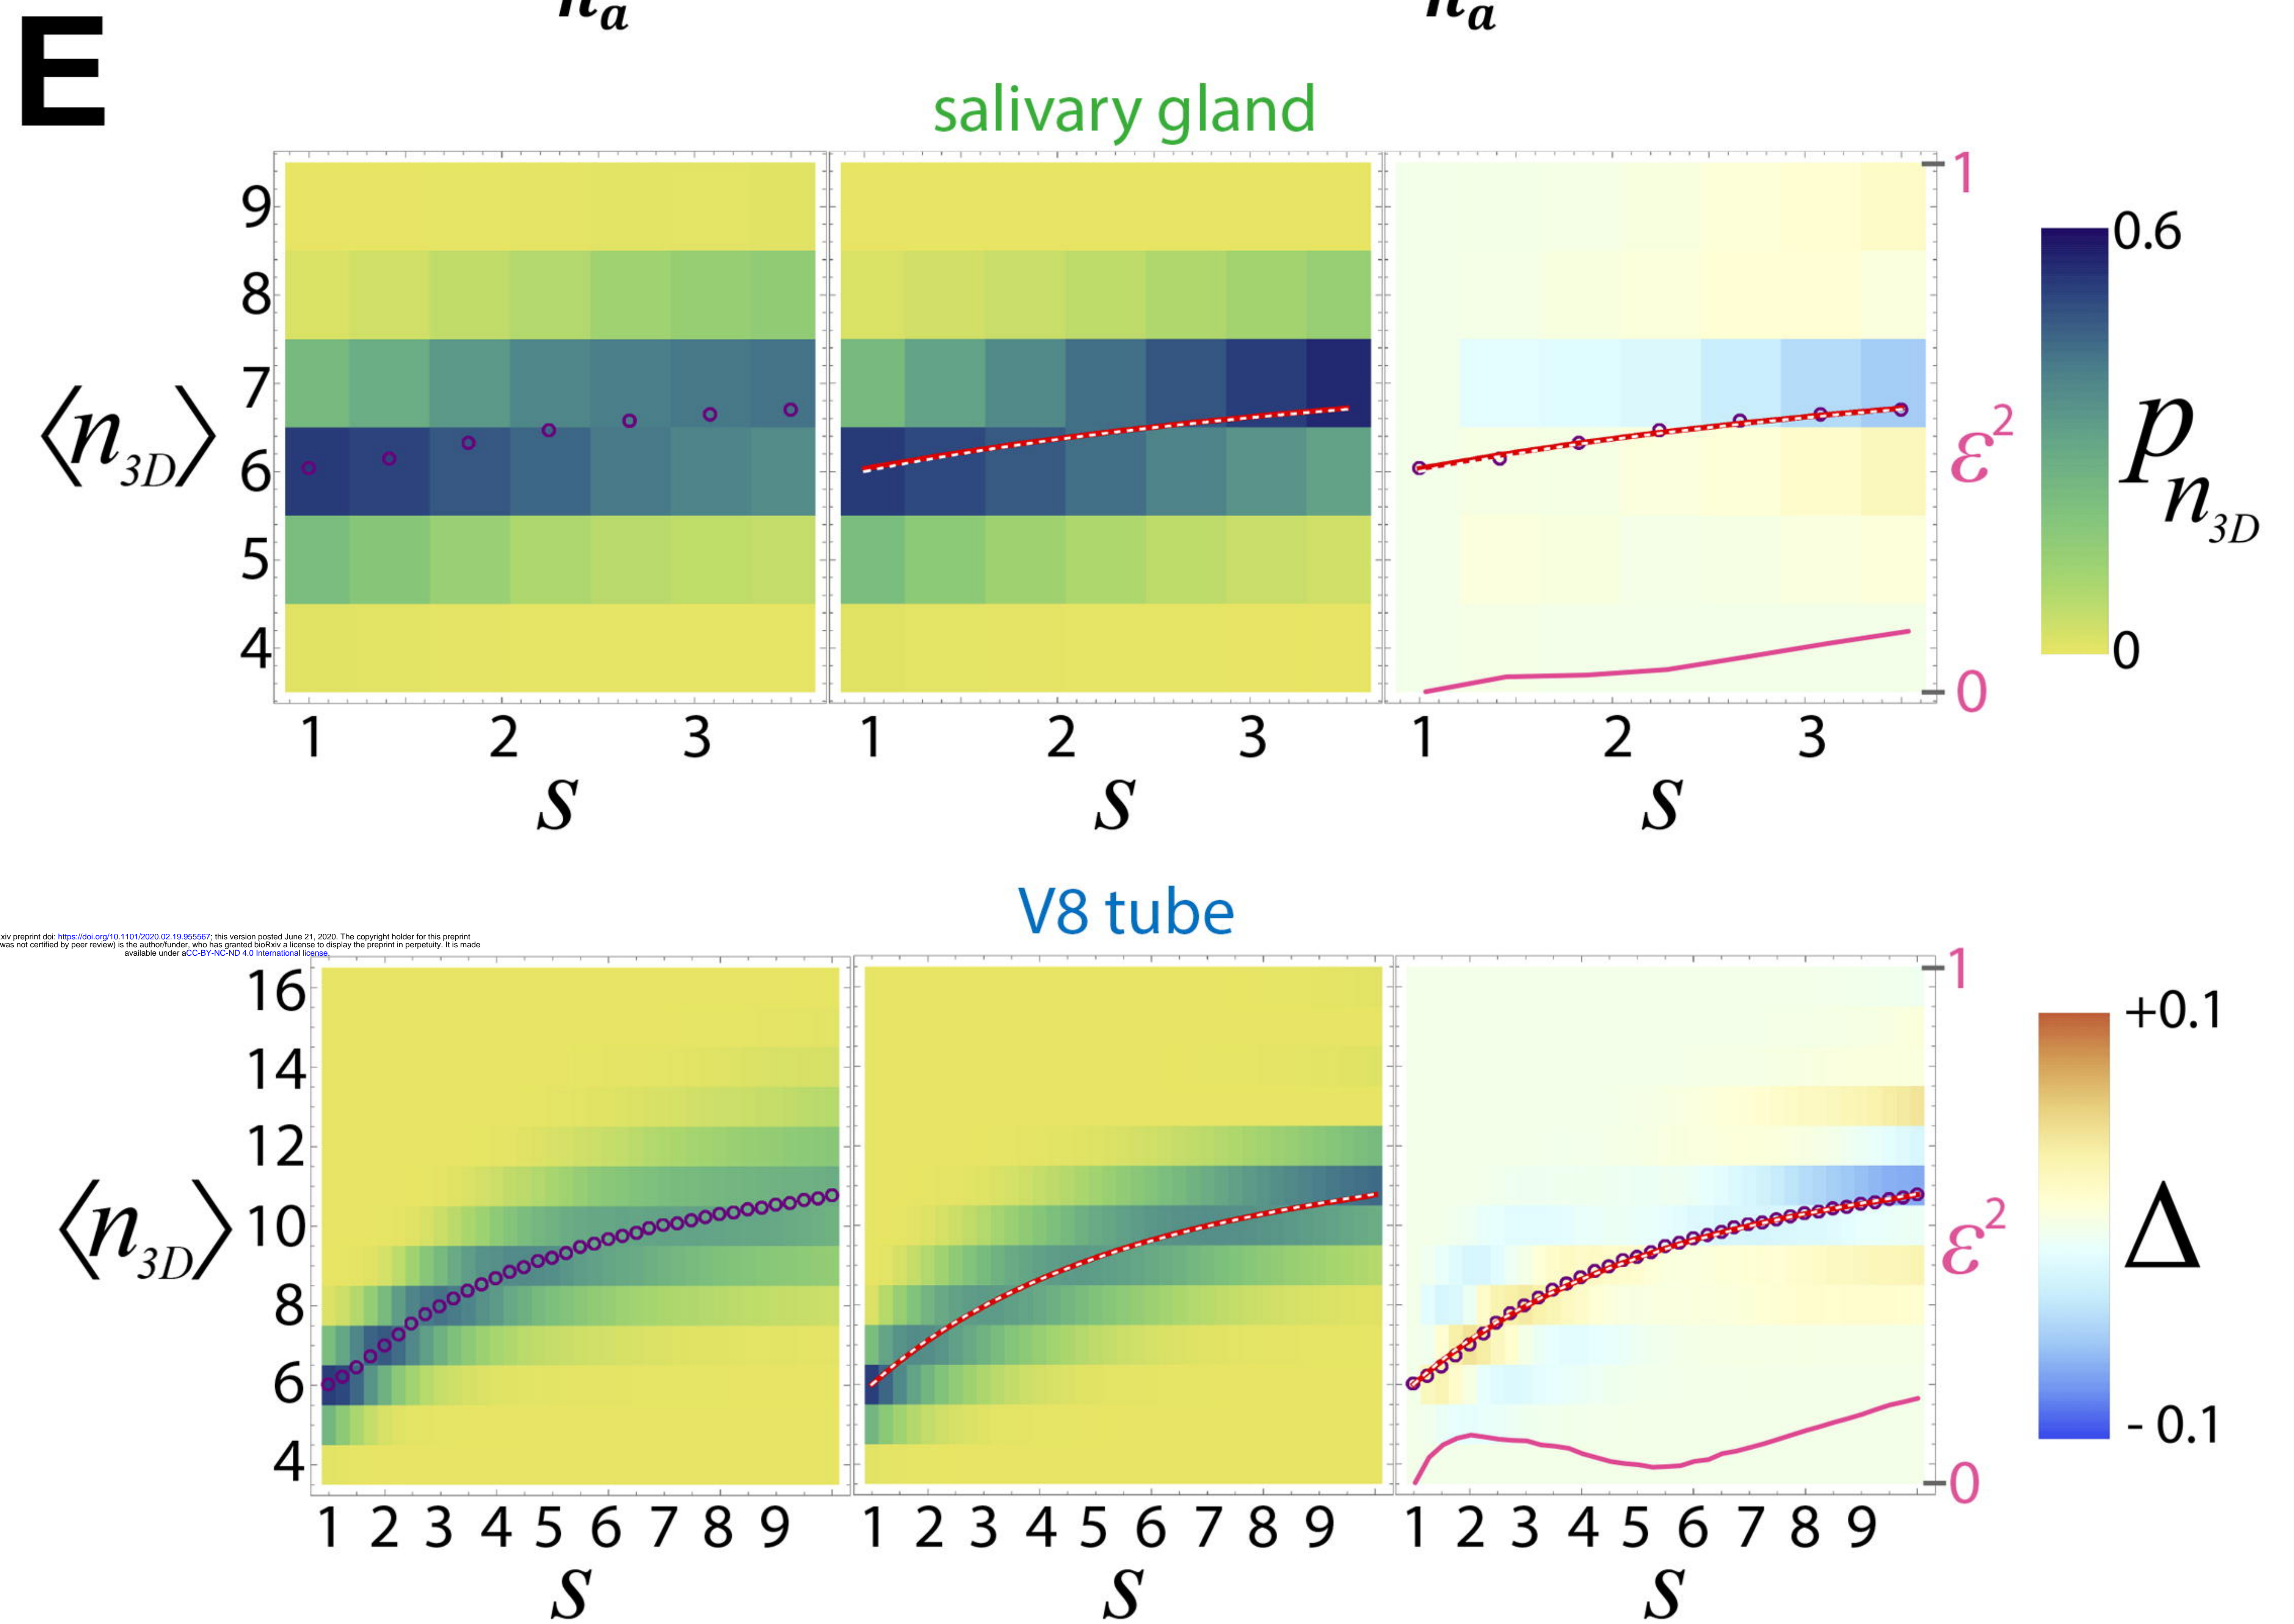

Source: https://www.biorxiv.org/content/10.1101/2020.02.19.955567v2.full.pdf
